# Supplementary material for: Comorbidity Genes of Alzheimer’s Disease and Type 2 Diabetes Associated with Memory and Cognitive Function
Source: Int J Mol Sci. 2024 Feb 12;25(4):2211. doi: 10.3390/ijms25042211 (PMC10889845; doi:10.3390/ijms25042211)
Supplement: Supplementary file 1 [file ijms-25-02211-s001.zip]

Archive with 7 entries (7 files):
- Supplementary Methods.pdf
- Table S1.xlsx
- Table S2.xlsx
- Table S3.xlsx
- Table S4.xlsx
- Table S5.xlsx
- Table S6.xlsx
