# Supplementary material for: Comorbidity Genes of Alzheimer’s Disease and Type 2 Diabetes Associated with Memory and Cognitive Function
Source: Int J Mol Sci. 2024 Feb 12;25(4):2211. doi: 10.3390/ijms25042211 (PMC10889845; doi:10.3390/ijms25042211)
Supplement: Supplementary file 1 [file ijms-25-02211-s001.zip › Table S2.xlsx]

## Sheet: Table S2
Gene Ontology	Odds ratio	P value
RESPONSE_TO_OXYGEN_CONTAINING_COMPOUND	16.057	1.97387e-301
POSITIVE_REGULATION_OF_MULTICELLULAR_ORGANISMAL_PROCESS	13.6141	1.23943e-240
RESPONSE_TO_ENDOGENOUS_STIMULUS	12.8097	2.39738e-234
CELLULAR_RESPONSE_TO_OXYGEN_CONTAINING_COMPOUND	15.0351	3.76024e-224
POSITIVE_REGULATION_OF_SIGNALING	11.6963	1.76091e-222
REGULATION_OF_TRANSPORT	11.534	3.81301e-222
REGULATION_OF_CELL_DEATH	11.975	5.53025e-222
APOPTOTIC_PROCESS	10.9111	1.27667e-219
HOMEOSTATIC_PROCESS	11.6261	1.16863e-216
REGULATION_OF_CELL_POPULATION_PROLIFERATION	11.1134	6.83538e-212
REGULATION_OF_INTRACELLULAR_SIGNAL_TRANSDUCTION	10.4735	9.56148e-197
RESPONSE_TO_NITROGEN_COMPOUND	13.8859	3.18661e-195
INFLAMMATORY_RESPONSE	16.9715	3.84873e-190
REGULATION_OF_RESPONSE_TO_EXTERNAL_STIMULUS	14.6896	2.97757e-189
DEFENSE_RESPONSE	9.95831	3.3369e-189
NEGATIVE_REGULATION_OF_MULTICELLULAR_ORGANISMAL_PROCESS	13.2116	1.95449e-188
REGULATION_OF_RESPONSE_TO_STRESS	11.4338	1.55967e-187
POSITIVE_REGULATION_OF_PROTEIN_METABOLIC_PROCESS	10.8882	1.1657e-184
POSITIVE_REGULATION_OF_MOLECULAR_FUNCTION	10.4907	5.37479e-183
LOCOMOTION	11.1196	2.0277e-182
CELLULAR_RESPONSE_TO_ENDOGENOUS_STIMULUS	11.3918	2.20863e-182
PHOSPHORYLATION	9.47818	1.89952e-181
RESPONSE_TO_LIPID	15.1674	2.72024e-180
REGULATION_OF_PHOSPHORUS_METABOLIC_PROCESS	11.0586	2.85004e-179
POSITIVE_REGULATION_OF_GENE_EXPRESSION	12.5598	7.44207e-179
CELL_MOTILITY	9.41355	2.7952e-175
RESPONSE_TO_ABIOTIC_STIMULUS	12.4461	1.76853e-173
NEGATIVE_REGULATION_OF_RESPONSE_TO_STIMULUS	9.58366	8.59528e-173
POSITIVE_REGULATION_OF_DEVELOPMENTAL_PROCESS	10.8751	2.06677e-172
REGULATION_OF_IMMUNE_SYSTEM_PROCESS	10.2688	2.31864e-172
REGULATION_OF_PROTEIN_MODIFICATION_PROCESS	9.88365	1.08418e-169
REGULATION_OF_CELL_DIFFERENTIATION	9.63374	9.06597e-169
CIRCULATORY_SYSTEM_DEVELOPMENT	11.6686	2.15485e-168
REGULATION_OF_MULTICELLULAR_ORGANISMAL_DEVELOPMENT	10.257	7.25893e-168
POSITIVE_REGULATION_OF_TRANSPORT	14.2865	5.50302e-167
RESPONSE_TO_HORMONE	14.2964	7.58007e-161
POSITIVE_REGULATION_OF_INTRACELLULAR_SIGNAL_TRANSDUCTION	12.5638	5.23151e-159
REGULATION_OF_LOCOMOTION	11.5561	9.55616e-158
RESPONSE_TO_ORGANIC_CYCLIC_COMPOUND	13.1293	1.00462e-155
CELL_CELL_SIGNALING	8.89417	1.06857e-155
BIOLOGICAL_PROCESS_INVOLVED_IN_INTERSPECIES_INTERACTION_BETWEEN_ORGANISMS	8.74414	3.29873e-155
REGULATION_OF_PROTEIN_PHOSPHORYLATION	11.405	1.84473e-154
CHEMICAL_HOMEOSTASIS	11.5891	2.2529e-150
CELLULAR_RESPONSE_TO_STRESS	7.84739	2.62087e-149
POSITIVE_REGULATION_OF_CATALYTIC_ACTIVITY	10.5539	4.60915e-148
POSITIVE_REGULATION_OF_PHOSPHORUS_METABOLIC_PROCESS	12.6646	1.55422e-147
POSITIVE_REGULATION_OF_CELL_POPULATION_PROLIFERATION	11.8144	8.24815e-145
TUBE_DEVELOPMENT	10.4741	8.76791e-143
POSITIVE_REGULATION_OF_PROTEIN_MODIFICATION_PROCESS	11.3695	2.83181e-142
NEGATIVE_REGULATION_OF_CELL_DEATH	11.2082	4.19111e-141
NEGATIVE_REGULATION_OF_SIGNALING	9.04455	9.04974e-141
VASCULATURE_DEVELOPMENT	13.1239	3.27546e-140
TISSUE_DEVELOPMENT	7.3615	3.43082e-138
POSITIVE_REGULATION_OF_PHOSPHORYLATION	12.7927	9.59787e-138
SECRETION	11.5651	1.51053e-137
RESPONSE_TO_CYTOKINE	11.7158	6.90911e-137
CELLULAR_RESPONSE_TO_NITROGEN_COMPOUND	14.2467	8.49097e-137
IMMUNE_RESPONSE	7.38492	7.13348e-136
CELL_ACTIVATION	10.0652	2.32448e-135
CYTOKINE_PRODUCTION	12.2921	1.64235e-132
ANATOMICAL_STRUCTURE_FORMATION_INVOLVED_IN_MORPHOGENESIS	9.35325	1.25633e-131
RESPONSE_TO_PEPTIDE	17.9134	6.50581e-131
RESPONSE_TO_WOUNDING	16.065	3.999e-130
TUBE_MORPHOGENESIS	10.9688	4.27683e-128
MAPK_CASCADE	12.3342	1.57477e-127
SMALL_MOLECULE_METABOLIC_PROCESS	7.21495	1.03838e-126
REGULATION_OF_SECRETION	14.5027	1.39899e-124
BLOOD_VESSEL_MORPHOGENESIS	13.1761	1.38809e-123
NEGATIVE_REGULATION_OF_DEVELOPMENTAL_PROCESS	10.2439	1.53931e-123
POSITIVE_REGULATION_OF_LOCOMOTION	14.6449	1.36315e-122
CELL_ADHESION	7.7197	3.49837e-121
EXPORT_FROM_CELL	10.8863	4.41495e-121
REGULATION_OF_TRANSFERASE_ACTIVITY	10.6586	1.17951e-120
REGULATION_OF_DEFENSE_RESPONSE	13.1738	1.57283e-120
LIPID_METABOLIC_PROCESS	7.99993	7.57629e-119
POSITIVE_REGULATION_OF_CELL_DEATH	14.034	3.78045e-118
POSITIVE_REGULATION_OF_CELL_DIFFERENTIATION	10.437	1.39281e-117
PEPTIDYL_AMINO_ACID_MODIFICATION	8.32675	1.60895e-116
REGULATION_OF_CELL_ADHESION	11.2021	7.77476e-115
POSITIVE_REGULATION_OF_MACROMOLECULE_BIOSYNTHETIC_PROCESS	6.53539	2.57146e-113
REGULATION_OF_SYSTEM_PROCESS	13.854	5.57175e-113
NEUROGENESIS	6.98645	2.10309e-112
POSITIVE_REGULATION_OF_IMMUNE_SYSTEM_PROCESS	9.69121	6.59011e-112
NEGATIVE_REGULATION_OF_CELL_POPULATION_PROLIFERATION	11.0182	5.20143e-111
POSITIVE_REGULATION_OF_CELLULAR_COMPONENT_ORGANIZATION	9.09464	7.93675e-111
CIRCULATORY_SYSTEM_PROCESS	13.2538	7.34411e-110
CELLULAR_HOMEOSTASIS	11.0609	1.32111e-109
APOPTOTIC_SIGNALING_PATHWAY	13.2598	1.18372e-108
ENZYME_LINKED_RECEPTOR_PROTEIN_SIGNALING_PATHWAY	9.11966	3.80523e-108
NEGATIVE_REGULATION_OF_PROTEIN_METABOLIC_PROCESS	8.38282	2.46493e-106
REGULATION_OF_INFLAMMATORY_RESPONSE	17.5675	2.63666e-106
RESPONSE_TO_INORGANIC_SUBSTANCE	13.6903	4.96658e-106
REGULATION_OF_ANATOMICAL_STRUCTURE_MORPHOGENESIS	9.13018	8.08487e-106
ION_TRANSPORT	6.85205	3.98936e-105
BEHAVIOR	12.3899	7.13254e-105
NEGATIVE_REGULATION_OF_MOLECULAR_FUNCTION	8.13854	1.24544e-104
CELLULAR_RESPONSE_TO_LIPID	12.6939	2.03524e-104
POSITIVE_REGULATION_OF_MAPK_CASCADE	14.6613	3.88243e-103
NEGATIVE_REGULATION_OF_GENE_EXPRESSION	6.83877	9.87145e-103
RESPONSE_TO_EXTRACELLULAR_STIMULUS	14.493	1.45379e-102
TAXIS	12.1616	1.75476e-101
POSITIVE_REGULATION_OF_CYTOKINE_PRODUCTION	14.7199	2.28842e-101
REGULATION_OF_CELLULAR_LOCALIZATION	9.01965	3.73647e-101
POSITIVE_REGULATION_OF_TRANSFERASE_ACTIVITY	12.6046	5.02092e-101
CELLULAR_RESPONSE_TO_HORMONE_STIMULUS	12.4007	3.69022e-100
RESPONSE_TO_MOLECULE_OF_BACTERIAL_ORIGIN	18.8603	6.1276e-100
RESPONSE_TO_PEPTIDE_HORMONE	16.165	5.11411e-99
POSITIVE_REGULATION_OF_RNA_METABOLIC_PROCESS	6.05111	2.52435e-98
RESPONSE_TO_BACTERIUM	10.0251	1.0066e-97
REGULATION_OF_CATABOLIC_PROCESS	8.48289	3.86796e-97
REGULATION_OF_PROTEIN_KINASE_ACTIVITY	10.9075	1.5202e-95
RESPONSE_TO_OXYGEN_LEVELS	19.1761	2.17062e-95
CELLULAR_RESPONSE_TO_PEPTIDE	17.191	2.338e-95
REGULATION_OF_HYDROLASE_ACTIVITY	8.2425	2.91707e-95
TRANSMEMBRANE_RECEPTOR_PROTEIN_TYROSINE_KINASE_SIGNALING_PATHWAY	11.1594	1.49147e-94
RESPONSE_TO_GROWTH_FACTOR	10.0628	2.76793e-94
POSITIVE_REGULATION_OF_RESPONSE_TO_EXTERNAL_STIMULUS	14.2785	4.66656e-94
VESICLE_MEDIATED_TRANSPORT	6.16565	1.15366e-91
REGULATION_OF_IMMUNE_RESPONSE	8.54521	4.07629e-91
REGULATION_OF_ION_TRANSPORT	10.0128	7.29379e-91
POSITIVE_REGULATION_OF_KINASE_ACTIVITY	13.0563	1.42772e-90
MULTICELLULAR_ORGANISMAL_HOMEOSTASIS	12.326	2.68688e-90
WOUND_HEALING	14.2134	5.81724e-90
REGULATION_OF_CELL_ACTIVATION	9.92505	7.29212e-90
CATION_TRANSPORT	7.09973	1.41279e-89
RESPONSE_TO_OXIDATIVE_STRESS	14.2542	8.67971e-89
CELLULAR_RESPONSE_TO_CHEMICAL_STRESS	17.2666	2.15375e-88
TRANSMEMBRANE_TRANSPORT	6.08753	6.10823e-88
PROTEOLYSIS	5.67443	1.42675e-87
NEURON_DEATH	16.2808	1.55077e-87
LEUKOCYTE_MIGRATION	15.1898	1.72314e-87
SIGNAL_RELEASE	13.1789	2.86003e-87
IMMUNE_SYSTEM_DEVELOPMENT	7.70261	5.54675e-87
NEGATIVE_REGULATION_OF_RESPONSE_TO_EXTERNAL_STIMULUS	13.8039	1.75005e-85
REGULATION_OF_VASCULATURE_DEVELOPMENT	16.2395	2.38621e-85
GROWTH	8.08956	4.25734e-85
CELLULAR_RESPONSE_TO_ORGANIC_CYCLIC_COMPOUND	10.9306	5.4723e-84
REGULATION_OF_HORMONE_LEVELS	11.7834	1.87167e-83
RESPONSE_TO_XENOBIOTIC_STIMULUS	13.4481	1.73634e-82
GENERATION_OF_NEURONS	6.0845	2.23325e-82
DEFENSE_RESPONSE_TO_OTHER_ORGANISM	6.83223	2.41789e-82
REGULATION_OF_CELLULAR_CATABOLIC_PROCESS	8.59189	4.91679e-82
CELL_CHEMOTAXIS	17.3032	5.12766e-82
NEGATIVE_REGULATION_OF_CATALYTIC_ACTIVITY	8.65553	5.8575e-82
REGULATION_OF_ESTABLISHMENT_OF_PROTEIN_LOCALIZATION	11.4995	8.45068e-82
REGULATION_OF_APOPTOTIC_SIGNALING_PATHWAY	14.9579	1.62946e-81
IMMUNE_EFFECTOR_PROCESS	9.41299	1.97554e-81
MUSCLE_CELL_PROLIFERATION	21.7268	3.09284e-81
CELL_CELL_ADHESION	7.5914	1.60857e-80
REGULATION_OF_LIPID_METABOLIC_PROCESS	15.6717	7.17475e-80
NEGATIVE_REGULATION_OF_CELL_DIFFERENTIATION	9.04109	2.16697e-79
POSITIVE_REGULATION_OF_PROTEIN_KINASE_ACTIVITY	13.2371	2.51936e-79
ESTABLISHMENT_OF_PROTEIN_LOCALIZATION	5.51262	4.41951e-79
REGULATION_OF_SMALL_MOLECULE_METABOLIC_PROCESS	15.705	1.41818e-78
REGULATION_OF_CELL_CELL_ADHESION	11.6555	2.50442e-78
POSITIVE_REGULATION_OF_TRANSCRIPTION_BY_RNA_POLYMERASE_II	6.39838	8.25e-78
ORGANIC_ACID_METABOLIC_PROCESS	7.38544	1.13582e-77
REGULATION_OF_PROTEOLYSIS	8.59784	2.51839e-77
METAL_ION_TRANSPORT	7.62222	2.6695e-77
REGULATION_OF_CELLULAR_RESPONSE_TO_STRESS	8.75408	2.81503e-77
SMALL_MOLECULE_BIOSYNTHETIC_PROCESS	10.2424	3.9772e-77
CYTOKINE_MEDIATED_SIGNALING_PATHWAY	11.3983	8.50882e-77
NEGATIVE_REGULATION_OF_TRANSPORT	11.5809	2.62732e-76
EPITHELIAL_CELL_PROLIFERATION	11.362	4.37219e-76
CELLULAR_RESPONSE_TO_OXIDATIVE_STRESS	17.4624	7.74301e-76
CENTRAL_NERVOUS_SYSTEM_DEVELOPMENT	6.81824	3.69418e-75
LIPID_LOCALIZATION	11.4153	3.96869e-75
NEGATIVE_REGULATION_OF_BIOSYNTHETIC_PROCESS	5.27387	5.0167e-75
POSITIVE_REGULATION_OF_CELL_ADHESION	11.3834	5.18369e-75
SMOOTH_MUSCLE_CELL_PROLIFERATION	27.758	1.10725e-74
POSITIVE_REGULATION_OF_SECRETION	16.4155	1.54387e-74
REGULATION_OF_TRANSMEMBRANE_TRANSPORT	9.47863	3.99179e-74
REGULATION_OF_PROTEIN_SECRETION	18.983	5.02135e-74
ERK1_AND_ERK2_CASCADE	14.601	5.78266e-74
EPITHELIUM_DEVELOPMENT	6.242	1.00761e-73
LYMPHOCYTE_ACTIVATION	7.73308	1.04054e-73
CELLULAR_RESPONSE_TO_BIOTIC_STIMULUS	18.6367	1.80721e-73
CELLULAR_LIPID_METABOLIC_PROCESS	6.88914	2.28119e-73
NEGATIVE_REGULATION_OF_INTRACELLULAR_SIGNAL_TRANSDUCTION	10.101	9.43089e-73
AMEBOIDAL_TYPE_CELL_MIGRATION	10.8863	1.32972e-72
PEPTIDYL_TYROSINE_MODIFICATION	13.162	3.36762e-72
REGULATION_OF_VESICLE_MEDIATED_TRANSPORT	10.0386	5.94225e-72
LEUKOCYTE_PROLIFERATION	14.1281	1.67881e-71
MUSCLE_STRUCTURE_DEVELOPMENT	8.55865	2.21198e-71
REGULATION_OF_GROWTH	9.114	2.45524e-71
PROTEIN_KINASE_B_SIGNALING	21.3799	2.95412e-71
REGULATION_OF_BODY_FLUID_LEVELS	12.7392	5.17381e-71
SYNAPTIC_SIGNALING	7.99013	6.88845e-71
NEGATIVE_REGULATION_OF_IMMUNE_SYSTEM_PROCESS	11.4149	1.69665e-70
CALCIUM_ION_TRANSPORT	11.5873	1.71322e-70
RESPONSE_TO_METAL_ION	13.4567	8.05402e-70
TISSUE_MIGRATION	12.964	8.89251e-70
LIPID_BIOSYNTHETIC_PROCESS	8.08125	1.30457e-69
LEUKOCYTE_CELL_CELL_ADHESION	12.0104	1.86775e-69
ION_HOMEOSTASIS	8.90958	2.48039e-69
ORGANIC_HYDROXY_COMPOUND_TRANSPORT	15.8518	3.17062e-69
CELLULAR_RESPONSE_TO_PEPTIDE_HORMONE_STIMULUS	15.1229	4.15566e-69
ORGANONITROGEN_COMPOUND_CATABOLIC_PROCESS	5.57213	6.72732e-69
HORMONE_TRANSPORT	15.2486	1.0811e-68
PROTEIN_LOCALIZATION_TO_EXTRACELLULAR_REGION	12.9934	1.31613e-68
ORGANIC_HYDROXY_COMPOUND_METABOLIC_PROCESS	9.59586	1.80082e-68
REGULATION_OF_METAL_ION_TRANSPORT	11.6545	2.29644e-68
LEUKOCYTE_DIFFERENTIATION	9.11792	2.37109e-68
REGULATION_OF_CELL_DEVELOPMENT	10.0644	2.58695e-68
REGULATION_OF_EPITHELIAL_CELL_MIGRATION	15.516	7.18515e-68
REGULATION_OF_LIPID_LOCALIZATION	23.8586	1.38012e-67
NEURON_DEVELOPMENT	6.13559	6.25963e-67
METAL_ION_HOMEOSTASIS	9.84521	6.61317e-67
ANIMAL_ORGAN_MORPHOGENESIS	6.28661	2.01941e-66
REPRODUCTION	5.20893	2.46349e-66
CELLULAR_ION_HOMEOSTASIS	9.81006	3.25366e-66
T_CELL_ACTIVATION	9.43212	3.26873e-66
POSITIVE_REGULATION_OF_ION_TRANSPORT	15.3216	4.09181e-66
REGULATION_OF_CELLULAR_COMPONENT_BIOGENESIS	6.52363	4.10727e-66
GLAND_DEVELOPMENT	10.9475	4.76917e-66
NEGATIVE_REGULATION_OF_CYTOKINE_PRODUCTION	12.4871	5.29446e-66
MUSCLE_SYSTEM_PROCESS	10.7283	7.35232e-66
MONOCARBOXYLIC_ACID_METABOLIC_PROCESS	8.6828	9.10909e-66
MAINTENANCE_OF_LOCATION	13.3137	1.20437e-65
POSITIVE_REGULATION_OF_PROTEIN_LOCALIZATION	10.6875	3.6961e-65
REGULATION_OF_HORMONE_SECRETION	17.9675	5.23596e-65
VASCULAR_PROCESS_IN_CIRCULATORY_SYSTEM	15.9216	1.70784e-64
ENDOCYTOSIS	8.21662	2.36149e-64
DEVELOPMENTAL_GROWTH	8.21662	2.36149e-64
GLIOGENESIS	14.1238	2.71148e-64
RESPONSE_TO_STEROID_HORMONE	13.0245	1.13148e-63
INNATE_IMMUNE_RESPONSE	6.59813	1.35448e-63
ENDOTHELIAL_CELL_MIGRATION	15.0243	1.72347e-63
REGULATION_OF_LEUKOCYTE_PROLIFERATION	15.7309	1.87677e-63
LEUKOCYTE_CHEMOTAXIS	17.3982	2.09737e-63
POSITIVE_REGULATION_OF_ERK1_AND_ERK2_CASCADE	18.2574	3.23928e-63
POSITIVE_REGULATION_OF_CELL_ACTIVATION	10.2769	3.63562e-63
REACTIVE_OXYGEN_SPECIES_METABOLIC_PROCESS	17.6344	4.88886e-63
POSITIVE_REGULATION_OF_CATABOLIC_PROCESS	9.25167	6.9572e-63
MYELOID_LEUKOCYTE_ACTIVATION	17.0675	3.62751e-62
TISSUE_REMODELING	22.4761	4.30107e-62
REGULATION_OF_DNA_BINDING_TRANSCRIPTION_FACTOR_ACTIVITY	10.1614	1.13889e-61
G_PROTEIN_COUPLED_RECEPTOR_SIGNALING_PATHWAY	5.40853	1.17648e-61
MYELOID_LEUKOCYTE_MIGRATION	16.634	1.732e-61
REGULATION_OF_PEPTIDYL_TYROSINE_PHOSPHORYLATION	15.3503	2.21036e-61
CELLULAR_METAL_ION_HOMEOSTASIS	10.6566	3.88595e-61
REGULATION_OF_LEUKOCYTE_MIGRATION	17.2982	4.479e-61
REGULATION_OF_ENDOTHELIAL_CELL_MIGRATION	17.2982	4.479e-61
NEURON_APOPTOTIC_PROCESS	15.9477	4.69992e-61
ORGANONITROGEN_COMPOUND_BIOSYNTHETIC_PROCESS	4.51599	5.11146e-61
NEGATIVE_REGULATION_OF_CELLULAR_COMPONENT_ORGANIZATION	7.4332	6.61397e-61
RESPONSE_TO_REACTIVE_OXYGEN_SPECIES	19.2199	9.30631e-61
RESPONSE_TO_INSULIN	14.9341	1.30406e-60
REGULATION_OF_IMMUNE_EFFECTOR_PROCESS	11.3657	1.82632e-60
ION_TRANSMEMBRANE_TRANSPORT	5.56777	5.83459e-60
CELL_PROJECTION_ORGANIZATION	4.75044	2.66718e-59
REGULATION_OF_PEPTIDASE_ACTIVITY	9.76088	3.72384e-59
RESPONSE_TO_RADIATION	9.85439	5.66692e-59
NERVOUS_SYSTEM_PROCESS	4.77535	8.99146e-59
REGULATION_OF_CALCIUM_ION_TRANSPORT	14.6441	1.01347e-58
POSITIVE_REGULATION_OF_LIPID_METABOLIC_PROCESS	24.724	2.29683e-58
MUSCLE_CELL_DIFFERENTIATION	10.4109	3.96498e-58
HEART_DEVELOPMENT	7.96563	5.57854e-58
REGULATION_OF_LYMPHOCYTE_ACTIVATION	8.34605	6.35953e-58
AMIDE_TRANSPORT	13.1863	9.82831e-58
POSITIVE_REGULATION_OF_IMMUNE_RESPONSE	8.00837	9.91498e-58
POSITIVE_REGULATION_OF_HYDROLASE_ACTIVITY	8.06962	1.45109e-57
REGULATION_OF_CHEMOTAXIS	16.3947	1.46455e-57
EXTRINSIC_APOPTOTIC_SIGNALING_PATHWAY	16.7241	2.40122e-57
TUMOR_NECROSIS_FACTOR_SUPERFAMILY_CYTOKINE_PRODUCTION	19.425	3.38577e-57
NEGATIVE_REGULATION_OF_DEFENSE_RESPONSE	14.1504	4.06013e-57
CATION_TRANSMEMBRANE_TRANSPORT	6.04258	4.3249e-57
REGULATION_OF_ORGANELLE_ORGANIZATION	5.30174	4.52221e-57
NEGATIVE_REGULATION_OF_APOPTOTIC_SIGNALING_PATHWAY	16.077	4.57118e-57
ENDOTHELIAL_CELL_PROLIFERATION	17.8694	9.17537e-57
POSITIVE_REGULATION_OF_PEPTIDYL_TYROSINE_PHOSPHORYLATION	18.9423	1.26572e-56
CARBOHYDRATE_HOMEOSTASIS	14.9653	1.3208e-56
REGULATION_OF_PROTEIN_SERINE_THREONINE_KINASE_ACTIVITY	10.4468	1.39768e-56
REGULATION_OF_LIPID_TRANSPORT	23.5148	1.61054e-56
REGULATION_OF_ANATOMICAL_STRUCTURE_SIZE	8.77957	2.08338e-56
NEGATIVE_REGULATION_OF_NUCLEOBASE_CONTAINING_COMPOUND_METABOLIC_PROCESS	4.64589	2.3627e-56
CELLULAR_AMIDE_METABOLIC_PROCESS	5.16995	4.42853e-56
POSITIVE_REGULATION_OF_SMALL_MOLECULE_METABOLIC_PROCESS	23.9498	4.67861e-56
REGULATION_OF_MUSCLE_SYSTEM_PROCESS	14.5388	7.52258e-56
PROTEIN_CONTAINING_COMPLEX_ORGANIZATION	4.26829	9.47578e-56
TEMPERATURE_HOMEOSTASIS	20.1105	1.17792e-55
MYELOID_CELL_DIFFERENTIATION	10.1419	1.27956e-55
NEGATIVE_REGULATION_OF_PROTEIN_MODIFICATION_PROCESS	8.54248	2.0066e-55
REGULATION_OF_TRANS_SYNAPTIC_SIGNALING	9.39732	3.1321e-55
REGULATION_OF_BINDING	10.7434	3.19174e-55
REGULATION_OF_REACTIVE_OXYGEN_SPECIES_METABOLIC_PROCESS	23.8412	3.89248e-55
CELL_MORPHOGENESIS	5.63944	1.52736e-54
NEGATIVE_REGULATION_OF_PHOSPHORUS_METABOLIC_PROCESS	9.35957	4.63143e-54
SECOND_MESSENGER_MEDIATED_SIGNALING	12.0127	7.73662e-54
STEROID_METABOLIC_PROCESS	11.6907	1.10606e-53
POSITIVE_REGULATION_OF_DNA_BINDING_TRANSCRIPTION_FACTOR_ACTIVITY	13.4992	2.93235e-53
POSITIVE_REGULATION_OF_EPITHELIAL_CELL_MIGRATION	19.3207	2.93925e-53
NEGATIVE_REGULATION_OF_CELL_ADHESION	12.0219	2.95968e-53
RESPONSE_TO_CARBOHYDRATE	14.9411	3.57791e-53
CARBOHYDRATE_METABOLIC_PROCESS	7.58175	6.29688e-53
POSITIVE_REGULATION_OF_TRANSMEMBRANE_TRANSPORT	14.7561	7.21953e-53
PEPTIDE_TRANSPORT	13.8828	1.11644e-52
REGULATION_OF_LIPID_BIOSYNTHETIC_PROCESS	18.6414	1.68607e-52
HEMOSTASIS	14.9178	1.86252e-52
INTRINSIC_APOPTOTIC_SIGNALING_PATHWAY	12.1528	2.42233e-52
NEGATIVE_REGULATION_OF_LOCOMOTION	9.45497	2.61038e-52
CELLULAR_RESPONSE_TO_EXTERNAL_STIMULUS	11.3539	2.93262e-52
POSITIVE_REGULATION_OF_CYTOSOLIC_CALCIUM_ION_CONCENTRATION	16.4716	5.43094e-52
REGULATION_OF_BLOOD_PRESSURE	17.5456	6.12443e-52
REGULATION_OF_T_CELL_ACTIVATION	10.153	7.82536e-52
RHYTHMIC_PROCESS	11.87	1.02085e-51
POSITIVE_REGULATION_OF_CELL_CELL_ADHESION	11.3544	1.12583e-51
PEPTIDYL_SERINE_MODIFICATION	11.0311	1.92218e-51
POSITIVE_REGULATION_OF_VASCULATURE_DEVELOPMENT	17.7074	2.1047e-51
PROCESS_UTILIZING_AUTOPHAGIC_MECHANISM	7.683	3.58584e-51
ACUTE_INFLAMMATORY_RESPONSE	29.331	4.8474e-51
POSITIVE_REGULATION_OF_CELLULAR_CATABOLIC_PROCESS	9.0604	5.82772e-51
NEGATIVE_REGULATION_OF_INFLAMMATORY_RESPONSE	17.8779	7.19837e-51
POSITIVE_REGULATION_OF_PROTEOLYSIS	9.99594	7.92565e-51
RESPONSE_TO_TUMOR_NECROSIS_FACTOR	13.5015	1.1016e-50
NEUROINFLAMMATORY_RESPONSE	53.3137	2.62567e-50
REGULATION_OF_BLOOD_CIRCULATION	12.9567	2.67385e-50
RESPONSE_TO_MONOSACCHARIDE	15.757	2.73778e-50
ANATOMICAL_STRUCTURE_HOMEOSTASIS	10.8052	2.74281e-50
HEAD_DEVELOPMENT	6.06004	2.85121e-50
REGULATION_OF_TUBE_SIZE	21.7709	3.83944e-50
POSITIVE_REGULATION_OF_ESTABLISHMENT_OF_PROTEIN_LOCALIZATION	11.3573	6.34786e-50
POSITIVE_REGULATION_OF_ORGANELLE_ORGANIZATION	8.00467	7.68137e-50
REGULATION_OF_NERVOUS_SYSTEM_DEVELOPMENT	8.59863	8.5043e-50
POSITIVE_REGULATION_OF_ENDOTHELIAL_CELL_MIGRATION	23.9432	2.16188e-49
NEGATIVE_REGULATION_OF_PHOSPHORYLATION	9.63966	3.22474e-49
POSITIVE_REGULATION_OF_CELL_DEVELOPMENT	11.2584	4.18961e-49
POSITIVE_REGULATION_OF_DEFENSE_RESPONSE	11.2584	4.18961e-49
REGULATION_OF_RESPONSE_TO_WOUNDING	18.2793	4.27028e-49
REGULATION_OF_CATION_TRANSMEMBRANE_TRANSPORT	9.40126	5.26035e-49
MACROMOLECULE_CATABOLIC_PROCESS	4.52057	6.33663e-49
REGULATION_OF_AUTOPHAGY	10.266	7.40102e-49
NEGATIVE_REGULATION_OF_RNA_METABOLIC_PROCESS	4.45799	9.24095e-49
DIVALENT_INORGANIC_CATION_HOMEOSTASIS	10.0105	1.06548e-48
POSITIVE_REGULATION_OF_INFLAMMATORY_RESPONSE	20.1471	1.07436e-48
EMBRYO_DEVELOPMENT	4.97356	1.13617e-48
OSSIFICATION	8.833	1.16995e-48
PEPTIDE_METABOLIC_PROCESS	5.39143	1.72308e-48
RECEPTOR_MEDIATED_ENDOCYTOSIS	12.5292	3.23402e-48
REGULATION_OF_PEPTIDE_TRANSPORT	16.871	3.28793e-48
RESPONSE_TO_ALCOHOL	12.8302	3.61992e-48
REGULATION_OF_ION_TRANSMEMBRANE_TRANSPORT	7.70969	3.94448e-48
POSITIVE_REGULATION_OF_CHEMOTAXIS	21.2585	4.15563e-48
REGULATION_OF_CELL_CYCLE	4.91193	4.23376e-48
REGULATION_OF_NEUROGENESIS	9.47116	1.18618e-47
CELLULAR_RESPONSE_TO_INSULIN_STIMULUS	14.8494	1.33506e-47
FATTY_ACID_METABOLIC_PROCESS	9.10744	1.49017e-47
REGULATION_OF_MAP_KINASE_ACTIVITY	16.3257	1.5631e-47
NEGATIVE_REGULATION_OF_HYDROLASE_ACTIVITY	9.55209	2.28021e-47
REGULATION_OF_DEVELOPMENTAL_GROWTH	10.3119	2.54455e-47
ORGANOPHOSPHATE_METABOLIC_PROCESS	5.12548	2.89577e-47
TISSUE_MORPHOGENESIS	6.71022	3.20686e-47
INSULIN_SECRETION	16.5949	3.73462e-47
INTERLEUKIN_1_PRODUCTION	23.0685	4.21615e-47
RECEPTOR_SIGNALING_PATHWAY_VIA_STAT	16.4574	5.5079e-47
CELL_CYCLE	3.87686	6.18021e-47
LEUKOCYTE_MEDIATED_IMMUNITY	8.21876	6.28361e-47
CELLULAR_RESPONSE_TO_REACTIVE_OXYGEN_SPECIES	19.8699	6.93193e-47
REGENERATION	15.8151	7.11365e-47
POSITIVE_REGULATION_OF_LEUKOCYTE_CELL_CELL_ADHESION	11.7711	1.0755e-46
CALCIUM_ION_HOMEOSTASIS	10.7246	1.13255e-46
POSITIVE_REGULATION_OF_PROTEIN_KINASE_B_SIGNALING	24.8507	1.18686e-46
PHOSPHATIDYLINOSITOL_3_KINASE_SIGNALING	20.4012	1.39676e-46
MULTICELLULAR_ORGANISM_REPRODUCTION	5.38685	1.78298e-46
POSITIVE_REGULATION_OF_LEUKOCYTE_PROLIFERATION	17.8625	2.05612e-46
MUSCLE_TISSUE_DEVELOPMENT	8.57692	2.75765e-46
COGNITION	10.5385	3.16252e-46
REGULATION_OF_HEMOPOIESIS	8.65734	4.55192e-46
INORGANIC_ION_TRANSMEMBRANE_TRANSPORT	5.32512	5.32231e-46
POSITIVE_REGULATION_OF_LEUKOCYTE_MIGRATION	19.7276	5.55154e-46
AGING	17.37	7.05996e-46
CELL_ACTIVATION_INVOLVED_IN_IMMUNE_RESPONSE	10.8558	7.59402e-46
CELL_GROWTH	7.64591	1.33355e-45
BLOOD_VESSEL_ENDOTHELIAL_CELL_MIGRATION	16.4564	1.47634e-45
POSITIVE_REGULATION_OF_LIPID_LOCALIZATION	25.8054	1.54926e-45
NEGATIVE_REGULATION_OF_NEURON_DEATH	13.8404	2.10341e-45
RESPONSE_TO_MECHANICAL_STIMULUS	14.0885	3.9868e-45
POSITIVE_REGULATION_OF_SMOOTH_MUSCLE_CELL_PROLIFERATION	30.0556	4.1484e-45
REGULATION_OF_CELL_PROJECTION_ORGANIZATION	6.22615	6.09774e-45
INOSITOL_LIPID_MEDIATED_SIGNALING	15.912	6.79905e-45
NEGATIVE_REGULATION_OF_SECRETION	16.4564	7.63732e-45
BIOLOGICAL_PROCESS_INVOLVED_IN_SYMBIOTIC_INTERACTION	10.4317	7.69093e-45
CHEMOKINE_PRODUCTION	29.4634	7.80886e-45
MONONUCLEAR_CELL_DIFFERENTIATION	7.75901	1.07738e-44
GLIAL_CELL_ACTIVATION	74.0133	1.20429e-44
REGULATION_OF_INSULIN_SECRETION	18.9499	1.68481e-44
RESPONSE_TO_TOXIC_SUBSTANCE	12.0937	2.69213e-44
MULTI_MULTICELLULAR_ORGANISM_PROCESS	13.5304	2.89543e-44
REGULATION_OF_CARBOHYDRATE_METABOLIC_PROCESS	15.4022	2.9963e-44
GLIAL_CELL_DIFFERENTIATION	13.0591	3.82581e-44
CELL_MORPHOGENESIS_INVOLVED_IN_DIFFERENTIATION	5.93978	5.42013e-44
CELLULAR_RESPONSE_TO_OXYGEN_LEVELS	16.3125	5.81159e-44
ALCOHOL_METABOLIC_PROCESS	9.07471	7.14396e-44
MONONUCLEAR_CELL_MIGRATION	14.1194	7.5773e-44
MACROPHAGE_ACTIVATION	25.5827	1.07753e-43
RESPONSE_TO_LIGHT_STIMULUS	9.91388	1.47582e-43
CELLULAR_RESPONSE_TO_EXTRACELLULAR_STIMULUS	11.5135	3.50035e-43
RESPONSE_TO_CORTICOSTEROID	16.7675	4.81677e-43
MYELOID_LEUKOCYTE_DIFFERENTIATION	13.1387	5.34999e-43
CELLULAR_RESPONSE_TO_ABIOTIC_STIMULUS	9.46925	6.46984e-43
RESPONSE_TO_TEMPERATURE_STIMULUS	14.8996	6.54607e-43
REGULATION_OF_BLOOD_VESSEL_ENDOTHELIAL_CELL_MIGRATION	18.0157	7.38539e-43
SPROUTING_ANGIOGENESIS	14.783	9.32431e-43
POSITIVE_REGULATION_OF_IMMUNE_EFFECTOR_PROCESS	11.2759	1.05491e-42
PROTEIN_CATABOLIC_PROCESS	4.86707	1.25035e-42
RESPONSE_TO_NUTRIENT	17.6474	1.6992e-42
REGULATION_OF_RESPONSE_TO_BIOTIC_STIMULUS	8.93177	1.974e-42
INTERLEUKIN_6_PRODUCTION	15.6133	1.98569e-42
EPITHELIAL_CELL_APOPTOTIC_PROCESS	19.131	2.23586e-42
STEROL_METABOLIC_PROCESS	17.4688	2.56328e-42
STRIATED_MUSCLE_CELL_DIFFERENTIATION	10.2516	3.47435e-42
ACTIVATION_OF_PROTEIN_KINASE_ACTIVITY	18.0517	3.78901e-42
CALCIUM_ION_TRANSMEMBRANE_TRANSPORT	9.14936	4.92338e-42
ORGANIC_ACID_BIOSYNTHETIC_PROCESS	9.46657	7.44748e-42
MEMBRANE_ORGANIZATION	5.18652	1.00738e-41
REGULATION_OF_INTRINSIC_APOPTOTIC_SIGNALING_PATHWAY	15.5999	1.02604e-41
REGULATION_OF_WOUND_HEALING	19.1981	1.13822e-41
GENERATION_OF_PRECURSOR_METABOLITES_AND_ENERGY	7.06715	1.93714e-41
LEUKOCYTE_ACTIVATION_INVOLVED_IN_INFLAMMATORY_RESPONSE	72.5528	4.37402e-41
I_KAPPAB_KINASE_NF_KAPPAB_SIGNALING	10.1826	6.47513e-41
MORPHOGENESIS_OF_AN_EPITHELIUM	6.8337	7.5938e-41
AXON_DEVELOPMENT	7.10962	9.22223e-41
REGULATION_OF_LEUKOCYTE_DIFFERENTIATION	9.4258	1.07604e-40
NEGATIVE_REGULATION_OF_TRANSCRIPTION_BY_RNA_POLYMERASE_II	4.86292	1.68621e-40
CELL_PART_MORPHOGENESIS	5.90329	1.72521e-40
REGULATION_OF_ENDOCYTOSIS	12.7435	1.81975e-40
T_CELL_PROLIFERATION	12.7435	1.81975e-40
POSITIVE_REGULATION_OF_CELLULAR_COMPONENT_BIOGENESIS	6.95239	4.17856e-40
VASCULAR_ASSOCIATED_SMOOTH_MUSCLE_CELL_PROLIFERATION	26.9452	4.38566e-40
POSITIVE_REGULATION_OF_EPITHELIAL_CELL_PROLIFERATION	12.0827	5.33246e-40
CELLULAR_COMPONENT_MORPHOGENESIS	5.41068	5.612e-40
HEART_PROCESS	10.7086	8.37886e-40
MUSCLE_CONTRACTION	8.7022	9.43789e-40
REGULATION_OF_PROTEIN_BINDING	13.0899	9.97616e-40
POSITIVE_REGULATION_OF_NF_KAPPAB_TRANSCRIPTION_FACTOR_ACTIVITY	16.3084	1.09989e-39
REGULATION_OF_EXTRINSIC_APOPTOTIC_SIGNALING_PATHWAY	16.3084	1.09989e-39
ORGANIC_HYDROXY_COMPOUND_BIOSYNTHETIC_PROCESS	11.2333	1.10159e-39
POSITIVE_REGULATION_OF_NEURON_DEATH	27.928	1.11553e-39
NEGATIVE_REGULATION_OF_CELL_CELL_ADHESION	12.998	1.36665e-39
POSITIVE_REGULATION_OF_TUMOR_NECROSIS_FACTOR_SUPERFAMILY_CYTOKINE_PRODUCTION	22.8205	1.5385e-39
CELLULAR_RESPONSE_TO_INORGANIC_SUBSTANCE	11.7839	1.69562e-39
SECONDARY_ALCOHOL_METABOLIC_PROCESS	16.8142	1.75163e-39
POSITIVE_REGULATION_OF_PROTEIN_SECRETION	19.1802	2.33336e-39
RESPONSE_TO_KETONE	12.8181	2.54926e-39
REGULATION_OF_PRODUCTION_OF_MOLECULAR_MEDIATOR_OF_IMMUNE_RESPONSE	13.5868	3.80217e-39
LIPID_HOMEOSTASIS	14.5249	4.82902e-39
NEGATIVE_REGULATION_OF_VASCULATURE_DEVELOPMENT	16.3092	5.66826e-39
REGULATION_OF_CELLULAR_AMIDE_METABOLIC_PROCESS	6.41344	6.178e-39
ADAPTIVE_THERMOGENESIS	15.5458	7.27914e-39
MAINTENANCE_OF_LOCATION_IN_CELL	11.7272	8.53009e-39
REGULATION_OF_PROTEIN_CATABOLIC_PROCESS	8.36439	9.18443e-39
CELL_SURFACE_RECEPTOR_SIGNALING_PATHWAY_INVOLVED_IN_CELL_CELL_SIGNALING	6.18232	1.33255e-38
REGULATION_OF_MEMBRANE_POTENTIAL	7.42232	1.83672e-38
REGULATION_OF_LEUKOCYTE_CHEMOTAXIS	19.0129	1.84708e-38
ACUTE_PHASE_RESPONSE	68.0264	2.17846e-38
VIRAL_PROCESS	7.52098	2.28739e-38
POSITIVE_REGULATION_OF_PHOSPHATIDYLINOSITOL_3_KINASE_SIGNALING	31.1085	2.83818e-38
REGULATION_OF_PROTEIN_CONTAINING_COMPLEX_ASSEMBLY	7.60196	3.37823e-38
MONOSACCHARIDE_METABOLIC_PROCESS	10.7516	3.55086e-38
GLUCOSE_METABOLIC_PROCESS	13.3384	3.72592e-38
POSITIVE_REGULATION_OF_NEUROGENESIS	11.3134	4.57473e-38
POSITIVE_REGULATION_OF_PROTEIN_SERINE_THREONINE_KINASE_ACTIVITY	11.3134	4.57473e-38
REGULATION_OF_PEPTIDYL_SERINE_PHOSPHORYLATION	16.8391	4.63595e-38
MITOCHONDRION_ORGANIZATION	6.3907	4.8402e-38
RESPONSE_TO_HYDROGEN_PEROXIDE	18.3164	6.80388e-38
NEGATIVE_REGULATION_OF_PROTEOLYSIS	8.39576	6.99282e-38
REGULATION_OF_PHOSPHATIDYLINOSITOL_3_KINASE_SIGNALING	21.2928	9.26091e-38
CELL_KILLING	13.0411	9.687e-38
CALCIUM_MEDIATED_SIGNALING	12.1734	1.07496e-37
DEVELOPMENTAL_PROCESS_INVOLVED_IN_REPRODUCTION	4.65092	1.21553e-37
CIRCADIAN_RHYTHM	12.0139	1.93323e-37
EPITHELIAL_CELL_DIFFERENTIATION	5.3788	2.00464e-37
RESPONSE_TO_VIRUS	7.47742	2.56456e-37
TISSUE_HOMEOSTASIS	9.78024	2.8246e-37
REGULATION_OF_TRANSPORTER_ACTIVITY	8.69792	3.05669e-37
NEGATIVE_REGULATION_OF_CELL_ACTIVATION	11.4671	3.7699e-37
INTRACELLULAR_TRANSPORT	3.65255	4.49356e-37
STRIATED_MUSCLE_TISSUE_DEVELOPMENT	10.1965	4.55324e-37
PHAGOCYTOSIS	9.00461	5.03063e-37
ORGAN_GROWTH	13.4561	5.1077e-37
REGULATION_OF_PLASMA_LIPOPROTEIN_PARTICLE_LEVELS	27.6475	6.5323e-37
RESPONSE_TO_STARVATION	11.7907	1.7357e-36
POSITIVE_REGULATION_OF_LIPID_BIOSYNTHETIC_PROCESS	26.4945	2.12557e-36
PROTEIN_LOCALIZATION_TO_ORGANELLE	4.66656	2.53923e-36
REGULATION_OF_CYSTEINE_TYPE_ENDOPEPTIDASE_ACTIVITY	10.6157	3.27494e-36
REGULATION_OF_MUSCLE_CELL_DIFFERENTIATION	14.3986	3.37973e-36
POSITIVE_REGULATION_OF_LIPID_TRANSPORT	25.9369	3.77868e-36
RESPONSE_TO_INTERLEUKIN_1	16.3178	3.97941e-36
RESPONSE_TO_AMYLOID_BETA	43.96	6.05435e-36
CELL_JUNCTION_ORGANIZATION	5.29706	6.27577e-36
STEROL_HOMEOSTASIS	22.1846	6.87127e-36
POSITIVE_REGULATION_OF_NERVOUS_SYSTEM_DEVELOPMENT	9.39763	6.95426e-36
REGULATION_OF_EPITHELIAL_CELL_APOPTOTIC_PROCESS	19.6143	7.79064e-36
REGULATION_OF_LEUKOCYTE_MEDIATED_IMMUNITY	10.384	9.13032e-36
STEROL_TRANSPORT	16.6925	9.35457e-36
CARBOHYDRATE_DERIVATIVE_METABOLIC_PROCESS	4.2049	9.48028e-36
POSITIVE_REGULATION_OF_GROWTH	9.82519	9.55643e-36
REGULATION_OF_RECEPTOR_SIGNALING_PATHWAY_VIA_STAT	19.3377	1.22361e-35
GRANULOCYTE_MIGRATION	14.4985	1.22725e-35
NEGATIVE_REGULATION_OF_CATABOLIC_PROCESS	8.27367	1.36116e-35
FAT_CELL_DIFFERENTIATION	10.2694	1.51206e-35
MONOCARBOXYLIC_ACID_BIOSYNTHETIC_PROCESS	11.2013	1.6295e-35
CELLULAR_KETONE_METABOLIC_PROCESS	11.1316	2.13969e-35
ADAPTIVE_IMMUNE_RESPONSE_BASED_ON_SOMATIC_RECOMBINATION_OF_IMMUNE_RECEPTORS_BUILT_FROM_IMMUNOGLOBULIN_SUPERFAMILY_DOMAINS	7.71252	2.30872e-35
INSULIN_RECEPTOR_SIGNALING_PATHWAY	17.7853	3.22638e-35
POSITIVE_REGULATION_OF_CHEMOKINE_PRODUCTION	32.8629	3.68288e-35
REGULATION_OF_CELLULAR_RESPONSE_TO_GROWTH_FACTOR_STIMULUS	8.08887	4.48944e-35
CARBOHYDRATE_TRANSMEMBRANE_TRANSPORT	16.7056	4.80412e-35
POSITIVE_REGULATION_OF_SYNAPTIC_TRANSMISSION	13.428	4.93246e-35
REGULATION_OF_CELLULAR_CARBOHYDRATE_METABOLIC_PROCESS	14.4665	6.30373e-35
POSITIVE_REGULATION_OF_MAP_KINASE_ACTIVITY	18.3053	7.06771e-35
CELL_DEATH_IN_RESPONSE_TO_OXIDATIVE_STRESS	21.6405	9.19656e-35
REGULATION_OF_GLUCOSE_TRANSMEMBRANE_TRANSPORT	28.7212	1.1312e-34
REGULATION_OF_NEURON_PROJECTION_DEVELOPMENT	6.73875	1.19145e-34
REGULATION_OF_ADAPTIVE_IMMUNE_RESPONSE	11.7665	1.23851e-34
REACTIVE_NITROGEN_SPECIES_METABOLIC_PROCESS	26.2454	1.47361e-34
REGULATION_OF_CELL_CYCLE_PROCESS	5.06883	1.56305e-34
RESPONSE_TO_AXON_INJURY	24.2581	1.65943e-34
LIPID_CATABOLIC_PROCESS	8.02549	2.0254e-34
REGULATION_OF_CELLULAR_MACROMOLECULE_BIOSYNTHETIC_PROCESS	5.78412	2.0639e-34
IMMUNE_RESPONSE_REGULATING_SIGNALING_PATHWAY	6.26376	2.40066e-34
POSITIVE_REGULATION_OF_BINDING	12.7817	3.31164e-34
SENSORY_PERCEPTION_OF_PAIN	20.5924	3.92087e-34
REGULATION_OF_CARBOHYDRATE_BIOSYNTHETIC_PROCESS	20.5924	3.92087e-34
POSITIVE_REGULATION_OF_LEUKOCYTE_CHEMOTAXIS	21.8381	4.54938e-34
MAMMARY_GLAND_DEVELOPMENT	15.6158	4.8125e-34
POSITIVE_REGULATION_OF_ION_TRANSMEMBRANE_TRANSPORT	12.167	5.45779e-34
INTERLEUKIN_8_PRODUCTION	20.2652	6.27624e-34
POSITIVE_REGULATION_OF_COLD_INDUCED_THERMOGENESIS	21.4613	7.45373e-34
REGULATION_OF_TISSUE_REMODELING	24.6037	7.94971e-34
REGULATION_OF_RESPONSE_TO_CYTOKINE_STIMULUS	12.4815	8.31454e-34
EMBRYONIC_MORPHOGENESIS	5.49063	1.25038e-33
ORGANIC_ACID_TRANSPORT	8.04958	1.54653e-33
CELL_MORPHOGENESIS_INVOLVED_IN_NEURON_DIFFERENTIATION	5.73965	1.7964e-33
POST_TRANSCRIPTIONAL_REGULATION_OF_GENE_EXPRESSION	4.12014	1.79694e-33
CALCIUM_ION_TRANSMEMBRANE_IMPORT_INTO_CYTOSOL	12.1977	2.04639e-33
POSITIVE_REGULATION_OF_REACTIVE_OXYGEN_SPECIES_METABOLIC_PROCESS	30.1538	2.25189e-33
REGULATION_OF_MITOCHONDRION_ORGANIZATION	14.2597	2.345e-33
STRESS_ACTIVATED_PROTEIN_KINASE_SIGNALING_CASCADE	9.59922	4.00343e-33
POSITIVE_REGULATION_OF_CALCIUM_ION_TRANSPORT	16.1445	4.08228e-33
GLYCEROLIPID_METABOLIC_PROCESS	6.97443	5.61371e-33
NEGATIVE_REGULATION_OF_PEPTIDASE_ACTIVITY	9.23497	6.70603e-33
REGULATION_OF_MYELOID_CELL_DIFFERENTIATION	10.652	7.48622e-33
PRODUCTION_OF_MOLECULAR_MEDIATOR_OF_IMMUNE_RESPONSE	7.77797	8.74781e-33
CELL_SUBSTRATE_ADHESION	7.27277	1.19118e-32
POSITIVE_REGULATION_OF_PEPTIDASE_ACTIVITY	11.2374	1.25779e-32
NEGATIVE_REGULATION_OF_SMOOTH_MUSCLE_CELL_PROLIFERATION	27.8147	1.45633e-32
CYTOSKELETON_ORGANIZATION	3.48055	1.50119e-32
CARBOHYDRATE_TRANSPORT	13.4729	1.74851e-32
HOMEOSTASIS_OF_NUMBER_OF_CELLS	8.34887	2.19183e-32
PLATELET_ACTIVATION	15.2471	2.65859e-32
NEGATIVE_REGULATION_OF_TRANSFERASE_ACTIVITY	8.70255	3.09097e-32
TYROSINE_PHOSPHORYLATION_OF_STAT_PROTEIN	22.9803	3.23775e-32
VIRAL_LIFE_CYCLE	7.88594	3.78225e-32
CELL_CYCLE_PROCESS	3.72774	4.08302e-32
CELLULAR_GLUCOSE_HOMEOSTASIS	13.1111	4.59819e-32
POSITIVE_REGULATION_OF_PROTEIN_CONTAINING_COMPLEX_ASSEMBLY	11.2464	4.7476e-32
POSITIVE_REGULATION_OF_BLOOD_VESSEL_ENDOTHELIAL_CELL_MIGRATION	26.4788	4.75927e-32
RESPONSE_TO_ESTRADIOL	16.5578	4.94052e-32
CELLULAR_COMPONENT_DISASSEMBLY	6.07229	5.33199e-32
REGULATION_OF_CELLULAR_KETONE_METABOLIC_PROCESS	14.9152	5.48212e-32
CARDIOCYTE_DIFFERENTIATION	12.9948	6.31337e-32
GRANULOCYTE_CHEMOTAXIS	15.5831	6.5264e-32
MUSCLE_CELL_MIGRATION	18.3026	7.29534e-32
MUSCLE_ADAPTATION	16.3509	7.30579e-32
AMYLOID_PRECURSOR_PROTEIN_METABOLIC_PROCESS	20.7159	7.86894e-32
CARBOHYDRATE_BIOSYNTHETIC_PROCESS	10.3843	7.94285e-32
REGULATION_OF_HEART_CONTRACTION	10.3198	1.02379e-31
UROGENITAL_SYSTEM_DEVELOPMENT	7.22103	1.31074e-31
REGULATION_OF_CALCIUM_ION_TRANSMEMBRANE_TRANSPORT	11.3379	1.35843e-31
CONNECTIVE_TISSUE_DEVELOPMENT	8.63105	1.42997e-31
FATTY_ACID_BIOSYNTHETIC_PROCESS	12.6578	1.60926e-31
CELLULAR_RESPONSE_TO_AMYLOID_BETA	47.1283	2.12061e-31
CELLULAR_CARBOHYDRATE_METABOLIC_PROCESS	8.13829	2.22859e-31
POSITIVE_REGULATION_OF_CELL_PROJECTION_ORGANIZATION	7.2829	2.34879e-31
MUSCLE_HYPERTROPHY	18.6558	2.40515e-31
REGULATION_OF_MUSCLE_CONTRACTION	11.9039	3.49827e-31
REGULATION_OF_RESPONSE_TO_OXIDATIVE_STRESS	18.3729	3.71031e-31
REGULATION_OF_GENERATION_OF_PRECURSOR_METABOLITES_AND_ENERGY	14.7267	4.0167e-31
LOCALIZATION_WITHIN_MEMBRANE	4.96973	4.25338e-31
REGULATION_OF_OXIDATIVE_STRESS_INDUCED_CELL_DEATH	24.1201	4.46643e-31
POSITIVE_REGULATION_OF_PRODUCTION_OF_MOLECULAR_MEDIATOR_OF_IMMUNE_RESPONSE	14.5662	5.71532e-31
HORMONE_METABOLIC_PROCESS	9.2784	6.83882e-31
REGULATION_OF_LIPID_STORAGE	38.6113	6.92182e-31
CYTOKINE_PRODUCTION_INVOLVED_IN_IMMUNE_RESPONSE	15.9505	8.09449e-31
NEGATIVE_REGULATION_OF_EPITHELIAL_CELL_PROLIFERATION	11.6277	8.29231e-31
RESPONSE_TO_ETHANOL	15.0347	1.00729e-30
MUSCLE_CELL_APOPTOTIC_PROCESS	20.156	1.01039e-30
PROTEIN_MATURATION	7.36226	1.06381e-30
CELLULAR_MACROMOLECULE_BIOSYNTHETIC_PROCESS	3.69406	1.11377e-30
NEGATIVE_REGULATION_OF_NEURON_APOPTOTIC_PROCESS	12.9999	1.1886e-30
ASTROCYTE_DIFFERENTIATION	23.0929	1.29019e-30
DNA_METABOLIC_PROCESS	3.96119	1.29437e-30
POSITIVE_REGULATION_OF_ENDOTHELIAL_CELL_PROLIFERATION	16.5872	1.29805e-30
POSITIVE_REGULATION_OF_PEPTIDYL_SERINE_PHOSPHORYLATION	17.5733	1.31813e-30
REGULATION_OF_OXIDOREDUCTASE_ACTIVITY	17.5733	1.31813e-30
AMYLOID_BETA_METABOLIC_PROCESS	30.0101	1.3221e-30
REGULATION_OF_NITRIC_OXIDE_METABOLIC_PROCESS	30.0101	1.3221e-30
NEGATIVE_REGULATION_OF_LIPID_LOCALIZATION	30.0101	1.3221e-30
NEUTROPHIL_MIGRATION	14.8637	1.44291e-30
REGULATION_OF_SIGNALING_RECEPTOR_ACTIVITY	12.3808	1.49797e-30
CHOLESTEROL_EFFLUX	26.9062	1.83801e-30
NEGATIVE_REGULATION_OF_MAPK_CASCADE	11.3636	1.92901e-30
FEEDING_BEHAVIOR	17.3166	1.99025e-30
SKELETAL_SYSTEM_DEVELOPMENT	5.53753	2.2084e-30
LEUKOCYTE_APOPTOTIC_PROCESS	16.1565	2.83058e-30
POSITIVE_REGULATION_OF_CARBOHYDRATE_METABOLIC_PROCESS	23.9463	3.67746e-30
CELLULAR_RESPONSE_TO_XENOBIOTIC_STIMULUS	11.1108	4.40702e-30
NEGATIVE_REGULATION_OF_KINASE_ACTIVITY	9.1029	5.06157e-30
NEGATIVE_REGULATION_OF_ION_TRANSPORT	11.8632	6.58277e-30
POSITIVE_REGULATION_OF_INTERLEUKIN_6_PRODUCTION	18.5293	9.57372e-30
IMPORT_INTO_CELL	8.71385	9.65775e-30
LIPID_STORAGE	21.2804	9.69289e-30
POSITIVE_REGULATION_OF_INTERLEUKIN_1_PRODUCTION	24.9256	1.0191e-29
POSITIVE_REGULATION_OF_INTERLEUKIN_8_PRODUCTION	29.959	1.10654e-29
REGULATION_OF_LIPID_CATABOLIC_PROCESS	29.959	1.10654e-29
APOPTOTIC_MITOCHONDRIAL_CHANGES	17.1048	1.52897e-29
REGULATION_OF_GLIOGENESIS	17.1048	1.52897e-29
NIK_NF_KAPPAB_SIGNALING	13.135	1.62549e-29
REGULATION_OF_COAGULATION	24.3317	1.76465e-29
POSITIVE_REGULATION_OF_HORMONE_SECRETION	14.9879	2.649e-29
SMOOTH_MUSCLE_CELL_MIGRATION	18.9322	3.13053e-29
EPITHELIAL_TUBE_MORPHOGENESIS	7.14813	3.3605e-29
TRANSMEMBRANE_RECEPTOR_PROTEIN_SERINE_THREONINE_KINASE_SIGNALING_PATHWAY	6.46606	3.56971e-29
AMIDE_BIOSYNTHETIC_PROCESS	4.08666	3.58373e-29
NEGATIVE_REGULATION_OF_GROWTH	8.68114	3.60957e-29
LYMPHOCYTE_MEDIATED_IMMUNITY	6.83616	3.93988e-29
PRODUCTION_OF_MOLECULAR_MEDIATOR_INVOLVED_IN_INFLAMMATORY_RESPONSE	17.4054	5.19223e-29
PROTEIN_PROCESSING	8.5491	6.80809e-29
POSITIVE_REGULATION_OF_ENDOCYTOSIS	18.311	7.48907e-29
SUPRAMOLECULAR_FIBER_ORGANIZATION	4.3162	9.47681e-29
REGULATION_OF_DNA_METABOLIC_PROCESS	5.33223	9.71642e-29
POSITIVE_REGULATION_OF_T_CELL_PROLIFERATION	16.8874	1.17014e-28
DEFENSE_RESPONSE_TO_BACTERIUM	6.54587	1.25556e-28
ADAPTIVE_IMMUNE_RESPONSE	4.55074	1.3225e-28
POSITIVE_REGULATION_OF_ADAPTIVE_IMMUNE_RESPONSE	14.9636	1.35773e-28
REPRODUCTIVE_SYSTEM_DEVELOPMENT	7.38504	1.59626e-28
AMINE_TRANSPORT	16.6424	1.74309e-28
NEGATIVE_REGULATION_OF_EXTRINSIC_APOPTOTIC_SIGNALING_PATHWAY	17.7293	1.74906e-28
REGULATION_OF_MITOTIC_CELL_CYCLE	5.42378	1.78913e-28
POSITIVE_REGULATION_OF_I_KAPPAB_KINASE_NF_KAPPAB_SIGNALING	10.334	2.31295e-28
REGULATION_OF_NIK_NF_KAPPAB_SIGNALING	15.5289	2.31955e-28
LYMPHOCYTE_ACTIVATION_INVOLVED_IN_IMMUNE_RESPONSE	9.6325	2.41691e-28
CELLULAR_RESPONSE_TO_STEROID_HORMONE_STIMULUS	9.57208	3.0614e-28
ESTABLISHMENT_OF_PROTEIN_LOCALIZATION_TO_ORGANELLE	5.88267	3.16444e-28
EMBRYO_DEVELOPMENT_ENDING_IN_BIRTH_OR_EGG_HATCHING	4.67922	3.30758e-28
REGULATION_OF_STEROL_TRANSPORT	21.2883	3.87981e-28
HUMORAL_IMMUNE_RESPONSE	7.24027	3.89025e-28
NEGATIVE_REGULATION_OF_LEUKOCYTE_CELL_CELL_ADHESION	12.4538	3.91576e-28
CELLULAR_RESPONSE_TO_TOXIC_SUBSTANCE	14.429	3.93152e-28
NEGATIVE_REGULATION_OF_INTRINSIC_APOPTOTIC_SIGNALING_PATHWAY	17.1778	3.99284e-28
CELLULAR_RESPONSE_TO_STARVATION	10.9634	4.05942e-28
REGULATION_OF_INNATE_IMMUNE_RESPONSE	8.65931	4.06742e-28
RESPONSE_TO_INTERFERON_GAMMA	13.0171	4.19335e-28
SEQUESTERING_OF_CALCIUM_ION	13.6685	4.21413e-28
REGULATION_OF_STRESS_ACTIVATED_PROTEIN_KINASE_SIGNALING_CASCADE	9.79998	4.44493e-28
HORMONE_MEDIATED_SIGNALING_PATHWAY	10.1186	4.92127e-28
INTRACELLULAR_PROTEIN_TRANSPORT	4.13643	5.12336e-28
ALPHA_BETA_T_CELL_ACTIVATION	10.8783	5.30945e-28
RESPONSE_TO_ACID_CHEMICAL	13.5196	5.86294e-28
POSITIVE_CHEMOTAXIS	27.2857	5.87868e-28
T_CELL_DIFFERENTIATION	7.51855	5.91128e-28
REGULATION_OF_STEROID_METABOLIC_PROCESS	16.9171	5.9836e-28
RESPONSE_TO_UV	12.2227	7.15847e-28
PROTEIN_LIPID_COMPLEX_SUBUNIT_ORGANIZATION	37.8212	8.47035e-28
REGULATION_OF_SYSTEMIC_ARTERIAL_BLOOD_PRESSURE	17.7895	8.91089e-28
REGULATION_OF_FATTY_ACID_METABOLIC_PROCESS	17.7895	8.91089e-28
POSITIVE_REGULATION_OF_HEMOPOIESIS	10.2514	1.12449e-27
POSITIVE_REGULATION_OF_RESPONSE_TO_WOUNDING	22.0043	1.16769e-27
REGULATION_OF_MUSCLE_ADAPTATION	17.5024	1.35185e-27
INTRACELLULAR_RECEPTOR_SIGNALING_PATHWAY	7.9449	1.41204e-27
RESPONSE_TO_ISCHEMIA	32.0047	1.7531e-27
MUSCLE_ORGAN_DEVELOPMENT	6.70695	1.76135e-27
NEUTROPHIL_CHEMOTAXIS	16.1816	1.95193e-27
REGULATION_OF_CELL_KILLING	16.1816	1.95193e-27
STEROID_BIOSYNTHETIC_PROCESS	10.4707	1.97348e-27
REGULATION_OF_NEUROINFLAMMATORY_RESPONSE	48.1163	2.14246e-27
EPITHELIAL_CELL_DEVELOPMENT	9.06053	2.41092e-27
NEGATIVE_REGULATION_OF_IMMUNE_RESPONSE	9.96868	3.04421e-27
REGULATION_OF_FAT_CELL_DIFFERENTIATION	12.1511	3.60045e-27
REGULATION_OF_NEUROTRANSMITTER_LEVELS	8.95418	3.75726e-27
REGULATION_OF_MYELOID_LEUKOCYTE_DIFFERENTIATION	14.0486	4.00427e-27
RECEPTOR_INTERNALIZATION	14.0486	4.00427e-27
CELLULAR_RESPONSE_TO_HYDROGEN_PEROXIDE	17.8546	4.53712e-27
OSTEOCLAST_DIFFERENTIATION	16.6883	4.56282e-27
ACTIVATION_OF_IMMUNE_RESPONSE	6.18155	5.05417e-27
RESPONSE_TO_HEAT	14.7223	5.09418e-27
POSITIVE_REGULATION_OF_TYROSINE_PHOSPHORYLATION_OF_STAT_PROTEIN	24.3962	5.73505e-27
AMYLOID_PRECURSOR_PROTEIN_CATABOLIC_PROCESS	24.3962	5.73505e-27
ENDOTHELIAL_CELL_APOPTOTIC_PROCESS	24.3962	5.73505e-27
B_CELL_ACTIVATION	6.66237	6.2243e-27
REGULATION_OF_MONOOXYGENASE_ACTIVITY	29.7939	6.48075e-27
MESENCHYMAL_CELL_DIFFERENTIATION	8.0571	7.19058e-27
GLUCOSE_IMPORT	21.7856	9.47476e-27
CELLULAR_RESPONSE_TO_INTERFERON_GAMMA	14.3535	1.0286e-26
MITOTIC_CELL_CYCLE	3.85115	1.28624e-26
FOREBRAIN_DEVELOPMENT	6.1758	1.29523e-26
RESPONSE_TO_PURINE_CONTAINING_COMPOUND	12.1949	1.34356e-26
PROTEIN_AUTOPHOSPHORYLATION	8.64961	1.37914e-26
MESENCHYME_DEVELOPMENT	6.95757	1.68227e-26
REGULATION_OF_SYNAPTIC_PLASTICITY	9.16774	1.7285e-26
POSITIVE_REGULATION_OF_CELL_CYCLE	6.37045	1.88046e-26
SENSORY_ORGAN_DEVELOPMENT	4.91676	2.00889e-26
VASOCONSTRICTION	19.4141	2.03466e-26
REGULATION_OF_LYMPHOCYTE_MEDIATED_IMMUNITY	10.1543	2.05643e-26
B_CELL_PROLIFERATION	15.7212	2.14563e-26
NUCLEOBASE_CONTAINING_SMALL_MOLECULE_METABOLIC_PROCESS	4.51545	2.17111e-26
MIRNA_METABOLIC_PROCESS	17.925	2.30877e-26
POSITIVE_REGULATION_OF_RECEPTOR_SIGNALING_PATHWAY_VIA_STAT	34.8255	3.07254e-26
REGULATION_OF_NUCLEOTIDE_METABOLIC_PROCESS	16.4535	3.46459e-26
RESPONSE_TO_ALKALOID	16.4535	3.46459e-26
REGULATION_OF_LIPASE_ACTIVITY	17.6158	3.51257e-26
POSITIVE_REGULATION_OF_CYSTEINE_TYPE_ENDOPEPTIDASE_ACTIVITY	11.728	4.34307e-26
REGULATION_OF_MUSCLE_HYPERTROPHY	22.0714	4.66114e-26
ANION_TRANSPORT	5.18129	4.79585e-26
REGULATION_OF_CELL_SUBSTRATE_ADHESION	8.61336	5.13976e-26
REGULATION_OF_MONONUCLEAR_CELL_MIGRATION	13.5076	5.57245e-26
SUPEROXIDE_METABOLIC_PROCESS	21.5578	7.67346e-26
REGULATION_OF_LEUKOCYTE_APOPTOTIC_PROCESS	17.0226	7.98281e-26
REGULATION_OF_B_CELL_PROLIFERATION	23.5658	8.07959e-26
OSTEOBLAST_DIFFERENTIATION	7.97365	9.76481e-26
REGULATION_OF_RECEPTOR_MEDIATED_ENDOCYTOSIS	13.9552	1.04359e-25
POSITIVE_REGULATION_OF_CELL_GROWTH	10.4552	1.05746e-25
REGULATION_OF_MIRNA_TRANSCRIPTION	25.4131	1.29251e-25
POSITIVE_REGULATION_OF_DEVELOPMENTAL_GROWTH	10.3724	1.36717e-25
NEUTRAL_LIPID_METABOLIC_PROCESS	12.4202	1.37882e-25
RESPONSE_TO_TRANSFORMING_GROWTH_FACTOR_BETA	7.27456	1.46798e-25
PROTEIN_CONTAINING_COMPLEX_REMODELING	61.3907	1.50672e-25
LOCOMOTORY_BEHAVIOR	9.16701	1.93871e-25
POSITIVE_REGULATION_OF_PROTEIN_CATABOLIC_PROCESS	8.855	1.96608e-25
MITOTIC_CELL_CYCLE_PROCESS	4.09284	2.06257e-25
LIPOPOLYSACCHARIDE_MEDIATED_SIGNALING_PATHWAY	24.6866	2.25612e-25
FIBROBLAST_PROLIFERATION	15.2612	2.31367e-25
MULTICELLULAR_ORGANISMAL_RESPONSE_TO_STRESS	18.7939	2.50849e-25
ENDOCRINE_SYSTEM_DEVELOPMENT	12.1659	2.51854e-25
LIPID_EXPORT_FROM_CELL	34.9837	2.56507e-25
CELL_CELL_SIGNALING_BY_WNT	5.39936	2.89286e-25
CELLULAR_RESPONSE_TO_CARBOHYDRATE_STIMULUS	11.0017	3.07095e-25
TRIGLYCERIDE_METABOLIC_PROCESS	15.0431	3.33323e-25
REGULATION_OF_PHAGOCYTOSIS	15.0431	3.33323e-25
RESPIRATORY_SYSTEM_DEVELOPMENT	8.69349	3.76368e-25
RESPONSE_TO_ACTIVITY	21.8405	3.78345e-25
REGULATION_OF_VASOCONSTRICTION	24.0005	3.88953e-25
DETOXIFICATION	10.905	4.02264e-25
PLASMA_LIPOPROTEIN_PARTICLE_CLEARANCE	29.6718	4.53441e-25
EXOCYTOSIS	6.03896	5.23711e-25
ORGANIC_ANION_TRANSPORT	6.03896	5.23711e-25
SMOOTH_MUSCLE_CONTRACTION	13.9058	5.32395e-25
NEGATIVE_REGULATION_OF_PROTEIN_SERINE_THREONINE_KINASE_ACTIVITY	13.1328	5.42201e-25
ACTIN_FILAMENT_BASED_PROCESS	3.99072	5.58781e-25
MONOAMINE_TRANSPORT	18.0843	5.9672e-25
REGULATION_OF_GLUCOSE_IMPORT	26.0189	6.06809e-25
AMYLOID_BETA_CLEARANCE	44.1584	7.92973e-25
DIGESTION	11.6774	8.12103e-25
RESPONSE_TO_VITAMIN	17.7492	9.10828e-25
BIOLOGICAL_PROCESS_INVOLVED_IN_INTERACTION_WITH_HOST	8.7647	9.12313e-25
REGULATION_OF_PROTEIN_STABILITY	6.47585	9.48327e-25
REGULATION_OF_GLUCOSE_METABOLIC_PROCESS	14.4247	9.69883e-25
POSITIVE_REGULATION_OF_NITRIC_OXIDE_METABOLIC_PROCESS	36.8922	1.03028e-24
REGULATION_OF_ALPHA_BETA_T_CELL_ACTIVATION	13.5575	1.03842e-24
NEGATIVE_REGULATION_OF_CELLULAR_CATABOLIC_PROCESS	7.6905	1.13566e-24
CELLULAR_SENESCENCE	14.2294	1.37259e-24
GLAND_MORPHOGENESIS	12.6842	1.39708e-24
CARDIAC_MUSCLE_CELL_DIFFERENTIATION	12.6842	1.39708e-24
BIOLOGICAL_PROCESS_INVOLVED_IN_INTERACTION_WITH_SYMBIONT	13.3898	1.44203e-24
CELL_JUNCTION_ASSEMBLY	5.48547	1.49347e-24
ENTRY_INTO_HOST	10.4454	1.50058e-24
LEUKOCYTE_MEDIATED_CYTOTOXICITY	11.9533	1.69899e-24
NEGATIVE_REGULATION_OF_ESTABLISHMENT_OF_PROTEIN_LOCALIZATION	11.9533	1.69899e-24
FATTY_ACID_TRANSPORT	15.0197	1.70612e-24
POSITIVE_REGULATION_OF_NIK_NF_KAPPAB_SIGNALING	22.1534	1.85931e-24
ALCOHOL_BIOSYNTHETIC_PROCESS	11.3409	1.89952e-24
ICOSANOID_METABOLIC_PROCESS	12.5416	1.90269e-24
REGULATION_OF_FIBROBLAST_PROLIFERATION	17.1094	2.08058e-24
CELLULAR_RESPONSE_TO_RADIATION	9.16739	2.17148e-24
INTRINSIC_APOPTOTIC_SIGNALING_PATHWAY_IN_RESPONSE_TO_DNA_DAMAGE	14.8026	2.44564e-24
SYNAPTIC_TRANSMISSION_GLUTAMATERGIC	14.8026	2.44564e-24
ADULT_BEHAVIOR	11.2329	2.5085e-24
CELLULAR_RESPONSE_TO_INTERLEUKIN_1	13.8543	2.71485e-24
T_CELL_ACTIVATION_INVOLVED_IN_IMMUNE_RESPONSE	13.0666	2.75046e-24
RELEASE_OF_CYTOCHROME_C_FROM_MITOCHONDRIA	26.713	2.82365e-24
REGULATION_OF_OSTEOCLAST_DIFFERENTIATION	21.5992	3.0652e-24
REGULATION_OF_MACROPHAGE_ACTIVATION	23.7876	3.19787e-24
REGULATION_OF_NERVOUS_SYSTEM_PROCESS	11.1269	3.30441e-24
ORGANOPHOSPHATE_BIOSYNTHETIC_PROCESS	4.53438	3.41646e-24
EMBRYONIC_ORGAN_DEVELOPMENT	5.29866	3.49534e-24
REGULATION_OF_MIRNA_METABOLIC_PROCESS	19.4654	4.08516e-24
CELLULAR_RESPONSE_TO_LIPOPROTEIN_PARTICLE_STIMULUS	45.0388	6.45114e-24
REGULATION_OF_TRANSMEMBRANE_RECEPTOR_PROTEIN_SERINE_THREONINE_KINASE_SIGNALING_PATHWAY	6.77458	6.85704e-24
REGULATION_OF_RELEASE_OF_CYTOCHROME_C_FROM_MITOCHONDRIA	32.1116	8.60488e-24
CELL_FATE_COMMITMENT	6.89946	8.95797e-24
NEGATIVE_REGULATION_OF_IMMUNE_EFFECTOR_PROCESS	12.4657	9.59563e-24
PROTEIN_LOCALIZATION_TO_NUCLEUS	6.55298	9.82957e-24
NEGATIVE_REGULATION_OF_ENDOTHELIAL_CELL_PROLIFERATION	18.654	9.96501e-24
RESPONSE_TO_ENDOPLASMIC_RETICULUM_STRESS	7.24862	1.02229e-23
CELL_MATRIX_ADHESION	7.67556	1.03813e-23
NEGATIVE_REGULATION_OF_CELL_DEVELOPMENT	9.0095	1.27402e-23
VASCULAR_ENDOTHELIAL_CELL_PROLIFERATION	27.5153	1.30044e-23
REGULATION_OF_SYNAPTIC_TRANSMISSION_GLUTAMATERGIC	18.2731	1.53826e-23
NEGATIVE_REGULATION_OF_WOUND_HEALING	18.2731	1.53826e-23
REGULATION_OF_MACROAUTOPHAGY	10.0906	1.55899e-23
PURINE_CONTAINING_COMPOUND_METABOLIC_PROCESS	4.90152	1.59201e-23
SENSORY_SYSTEM_DEVELOPMENT	5.57074	1.92005e-23
CELLULAR_RESPONSE_TO_DNA_DAMAGE_STIMULUS	3.73398	2.02567e-23
ENDOCRINE_PROCESS	15.4537	2.14501e-23
RESPONSE_TO_CADMIUM_ION	23.5636	2.62611e-23
POSITIVE_REGULATION_OF_DNA_METABOLIC_PROCESS	6.52833	2.93921e-23
NEGATIVE_REGULATION_OF_RESPONSE_TO_WOUNDING	15.2083	3.10355e-23
VASODILATION	29.5373	3.17268e-23
REGULATION_OF_ATP_METABOLIC_PROCESS	19.1983	3.23182e-23
FOAM_CELL_DIFFERENTIATION	39.7598	3.30649e-23
CARBOXYLIC_ACID_TRANSPORT	6.66726	3.36041e-23
REGULATION_OF_PROTEIN_LOCALIZATION_TO_NUCLEUS	11.2714	3.53483e-23
POSITIVE_REGULATION_OF_AUTOPHAGY	10.7282	3.65326e-23
PHOSPHOLIPID_METABOLIC_PROCESS	5.59042	3.74542e-23
REGULATION_OF_AMYLOID_PRECURSOR_PROTEIN_CATABOLIC_PROCESS	25.6611	4.1754e-23
REGULATION_OF_INTRACELLULAR_PROTEIN_TRANSPORT	7.83186	4.41985e-23
NEGATIVE_REGULATION_OF_TRANSMEMBRANE_TRANSPORT	10.165	4.56698e-23
CELLULAR_RESPONSE_TO_VASCULAR_ENDOTHELIAL_GROWTH_FACTOR_STIMULUS	18.7808	5.04173e-23
REGULATION_OF_BEHAVIOR	18.7808	5.04173e-23
RAS_PROTEIN_SIGNAL_TRANSDUCTION	5.88623	5.26298e-23
MEMORY	12.2438	6.54108e-23
REGULATION_OF_CIRCADIAN_RHYTHM	12.2438	6.54108e-23
INTRINSIC_APOPTOTIC_SIGNALING_PATHWAY_IN_RESPONSE_TO_OXIDATIVE_STRESS	32.1495	7.20445e-23
STEM_CELL_DIFFERENTIATION	7.25322	7.78952e-23
REGULATION_OF_ORGANIC_ACID_TRANSPORT	18.381	7.80195e-23
ENERGY_DERIVATION_BY_OXIDATION_OF_ORGANIC_COMPOUNDS	6.07718	8.14281e-23
NEGATIVE_REGULATION_OF_EPITHELIAL_CELL_MIGRATION	12.7639	9.67281e-23
CARDIAC_MUSCLE_CONTRACTION	10.8344	1.05261e-22
REGULATION_OF_SPROUTING_ANGIOGENESIS	21.6522	1.22414e-22
PEPTIDE_BIOSYNTHETIC_PROCESS	3.8213	1.24602e-22
REGULATION_OF_STRIATED_MUSCLE_CELL_DIFFERENTIATION	14.2999	1.29333e-22
REGULATION_OF_CYTOSKELETON_ORGANIZATION	4.61419	1.5443e-22
SEX_DIFFERENTIATION	6.55923	1.62979e-22
CHOLESTEROL_STORAGE	129.854	1.8465e-22
NUCLEOSIDE_TRIPHOSPHATE_METABOLIC_PROCESS	6.86751	2.0564e-22
BIOMINERALIZATION	8.87481	2.21849e-22
MONOCYTE_CHEMOTAXIS	18.9201	2.54839e-22
CELLULAR_OXIDANT_DETOXIFICATION	13.8848	2.56608e-22
SYNAPSE_ORGANIZATION	5.15933	2.6342e-22
POSITIVE_REGULATION_OF_NUCLEOTIDE_METABOLIC_PROCESS	29.4644	2.65425e-22
POSITIVE_REGULATION_OF_MIRNA_TRANSCRIPTION	29.4644	2.65425e-22
MUSCLE_CELL_DEVELOPMENT	8.49484	2.68114e-22
RENAL_SYSTEM_PROCESS	11.5652	2.82821e-22
INTERLEUKIN_10_PRODUCTION	20.5414	3.23171e-22
REGULATION_OF_ANION_TRANSPORT	14.7079	3.27154e-22
GLIAL_CELL_DEVELOPMENT	12.1589	3.2861e-22
TUMOR_NECROSIS_FACTOR_MEDIATED_SIGNALING_PATHWAY	12.8507	3.57432e-22
SEXUAL_REPRODUCTION	3.59189	3.59516e-22
MORPHOGENESIS_OF_A_BRANCHING_STRUCTURE	8.11184	3.7406e-22
ENDOTHELIUM_DEVELOPMENT	10.3335	3.89402e-22
NEGATIVE_REGULATION_OF_PROTEIN_SECRETION	18.4994	3.95416e-22
POSITIVE_REGULATION_OF_APOPTOTIC_SIGNALING_PATHWAY	10.842	3.95684e-22
IN_UTERO_EMBRYONIC_DEVELOPMENT	5.39317	3.99254e-22
POSITIVE_REGULATION_OF_PEPTIDE_SECRETION	14.4777	4.65959e-22
ADENYLATE_CYCLASE_MODULATING_G_PROTEIN_COUPLED_RECEPTOR_SIGNALING_PATHWAY	7.09395	4.74446e-22
MYELOID_LEUKOCYTE_MEDIATED_IMMUNITY	12.6857	4.88799e-22
MACROAUTOPHAGY	6.06278	5.30369e-22
PEPTIDYL_THREONINE_MODIFICATION	11.8688	5.93556e-22
INTERFERON_GAMMA_PRODUCTION	11.8688	5.93556e-22
MACROPHAGE_MIGRATION	21.9937	6.02638e-22
NECROTIC_CELL_DEATH	18.0971	6.08538e-22
POSITIVE_REGULATION_OF_MONONUCLEAR_CELL_MIGRATION	18.0971	6.08538e-22
NEGATIVE_REGULATION_OF_BINDING	9.28295	6.43459e-22
RESPONSE_TO_ORGANOPHOSPHORUS	11.1963	6.56738e-22
REGULATION_OF_ORGAN_GROWTH	13.3053	6.93855e-22
ATP_METABOLIC_PROCESS	7.6885	7.15352e-22
REGULATION_OF_CATION_CHANNEL_ACTIVITY	8.22014	7.5338e-22
NEGATIVE_REGULATION_OF_REACTIVE_OXYGEN_SPECIES_METABOLIC_PROCESS	27.217	9.03425e-22
POSITIVE_REGULATION_OF_NEURON_APOPTOTIC_PROCESS	23.8224	1.03949e-21
REGULATION_OF_T_CELL_MEDIATED_IMMUNITY	14.9177	1.16904e-21
POSITIVE_REGULATION_OF_GLUCOSE_TRANSMEMBRANE_TRANSPORT	30.7297	1.17037e-21
T_CELL_MEDIATED_IMMUNITY	12.2185	1.22311e-21
CELLULAR_RESPONSE_TO_KETONE	12.9451	1.31894e-21
PANCREAS_DEVELOPMENT	15.9928	1.35081e-21
DEVELOPMENTAL_MATURATION	6.19279	1.41995e-21
REGULATED_EXOCYTOSIS	7.07536	1.42816e-21
NEGATIVE_REGULATION_OF_HORMONE_SECRETION	20.8045	1.60935e-21
POSITIVE_REGULATION_OF_WOUND_HEALING	20.8045	1.60935e-21
POSITIVE_REGULATION_OF_VASCULAR_ASSOCIATED_SMOOTH_MUSCLE_CELL_PROLIFERATION	26.1945	1.6226e-21
POSITIVE_REGULATION_OF_MIRNA_METABOLIC_PROCESS	23.0776	1.76425e-21
DIGESTIVE_SYSTEM_PROCESS	12.7723	1.80764e-21
POSITIVE_REGULATION_OF_LEUKOCYTE_MEDIATED_IMMUNITY	10.2258	1.88945e-21
STRIATED_MUSCLE_CONTRACTION	8.58519	1.96162e-21
MYELOID_CELL_HOMEOSTASIS	8.93041	1.98848e-21
POSITIVE_REGULATION_OF_GLIOGENESIS	18.6299	2.00244e-21
REGULATION_OF_STEROID_BIOSYNTHETIC_PROCESS	16.9831	2.11772e-21
POSITIVE_REGULATION_OF_B_CELL_PROLIFERATION	29.3871	2.22094e-21
COLLAGEN_METABOLIC_PROCESS	12.6039	2.46789e-21
POSITIVE_REGULATION_OF_FATTY_ACID_METABOLIC_PROCESS	33.9293	2.54197e-21
REGULATION_OF_SUPRAMOLECULAR_FIBER_ORGANIZATION	5.35965	2.55892e-21
VASCULAR_ENDOTHELIAL_GROWTH_FACTOR_PRODUCTION	20.2568	2.5876e-21
INTERLEUKIN_12_PRODUCTION	20.2568	2.5876e-21
NEUROTRANSMITTER_TRANSPORT	7.63639	2.60801e-21
NEGATIVE_REGULATION_OF_PROTEIN_LOCALIZATION	7.86414	3.02611e-21
CYTOKINE_PRODUCTION_INVOLVED_IN_INFLAMMATORY_RESPONSE	16.6433	3.1627e-21
PYRUVATE_METABOLIC_PROCESS	12.4414	3.35663e-21
RESPONSE_TO_IONIZING_RADIATION	9.94589	3.99924e-21
SMALL_MOLECULE_CATABOLIC_PROCESS	5.2944	4.23926e-21
NEGATIVE_REGULATION_OF_CELLULAR_AMIDE_METABOLIC_PROCESS	6.31412	4.32775e-21
REGULATION_OF_INTRACELLULAR_TRANSPORT	5.73879	4.45405e-21
CANONICAL_WNT_SIGNALING_PATHWAY	6.00125	4.61407e-21
NEGATIVE_REGULATION_OF_MUSCLE_CELL_DIFFERENTIATION	17.8016	4.72726e-21
REVERSE_CHOLESTEROL_TRANSPORT	122.368	4.72842e-21
EXTERNAL_ENCAPSULATING_STRUCTURE_ORGANIZATION	5.83126	5.66091e-21
ANIMAL_ORGAN_REGENERATION	19.2436	6.49002e-21
PROTEIN_LOCALIZATION_TO_CELL_PERIPHERY	5.67834	6.71434e-21
REGULATION_OF_MACROPHAGE_DERIVED_FOAM_CELL_DIFFERENTIATION	44.7838	8.12879e-21
NEGATIVE_REGULATION_OF_CELLULAR_RESPONSE_TO_GROWTH_FACTOR_STIMULUS	11.2411	9.24075e-21
ASTROCYTE_DEVELOPMENT	30.7077	9.80506e-21
REGULATION_OF_INSULIN_RECEPTOR_SIGNALING_PATHWAY	17.0382	1.08086e-20
CARTILAGE_DEVELOPMENT	7.81192	1.10799e-20
REGULATION_OF_OSSIFICATION	11.1147	1.21827e-20
REGULATION_OF_CELL_DIVISION	8.06893	1.25263e-20
POSITIVE_REGULATION_OF_OXIDOREDUCTASE_ACTIVITY	20.5126	1.29214e-20
NEGATIVE_REGULATION_OF_BLOOD_PRESSURE	26.0008	1.34803e-20
DEFENSE_RESPONSE_TO_SYMBIONT	5.94624	1.56841e-20
RESPONSE_TO_CHEMOKINE	13.1609	1.78748e-20
PATTERN_RECOGNITION_RECEPTOR_SIGNALING_PATHWAY	7.96254	1.86224e-20
UNSATURATED_FATTY_ACID_METABOLIC_PROCESS	11.5378	1.97209e-20
NEGATIVE_REGULATION_OF_HEMOPOIESIS	11.5378	1.97209e-20
GENE_SILENCING_BY_RNA	3.8905	2.02146e-20
EPITHELIAL_TO_MESENCHYMAL_TRANSITION	8.55912	2.18878e-20
RESPONSE_TO_NICOTINE	25.0375	2.37282e-20
POSITIVE_REGULATION_OF_CELL_CYCLE_PROCESS	6.51397	2.40072e-20
NEGATIVE_REGULATION_OF_OXIDATIVE_STRESS_INDUCED_CELL_DEATH	22.1002	2.4055e-20
MONOSACCHARIDE_BIOSYNTHETIC_PROCESS	13.9284	2.42229e-20
MYELOID_CELL_ACTIVATION_INVOLVED_IN_IMMUNE_RESPONSE	12.9698	2.46192e-20
CD4_POSITIVE_ALPHA_BETA_T_CELL_ACTIVATION	11.4006	2.61812e-20
REGULATION_OF_PROTEIN_LOCALIZATION_TO_MEMBRANE	8.49557	2.7041e-20
REGULATION_OF_OXIDATIVE_STRESS_INDUCED_INTRINSIC_APOPTOTIC_SIGNALING_PATHWAY	50.0865	2.72651e-20
RESPONSE_TO_TOPOLOGICALLY_INCORRECT_PROTEIN	8.85141	2.76773e-20
REGULATION_OF_CELL_JUNCTION_ASSEMBLY	7.57326	2.86325e-20
DEVELOPMENT_OF_PRIMARY_SEXUAL_CHARACTERISTICS	6.85587	3.02878e-20
NEURON_PROJECTION_REGENERATION	19.4327	3.26927e-20
REACTIVE_OXYGEN_SPECIES_BIOSYNTHETIC_PROCESS	19.4327	3.26927e-20
JNK_CASCADE	8.43297	3.33546e-20
REGULATION_OF_WNT_SIGNALING_PATHWAY	5.56517	3.34125e-20
POSITIVE_REGULATION_OF_MITOCHONDRION_ORGANIZATION	16.0163	3.53599e-20
REGULATION_OF_PROTEIN_MODIFICATION_BY_SMALL_PROTEIN_CONJUGATION_OR_REMOVAL	6.61168	3.7773e-20
HEPATICOBILIARY_SYSTEM_DEVELOPMENT	9.56476	3.95482e-20
RESPONSE_TO_FLUID_SHEAR_STRESS	38.828	4.0868e-20
POSITIVE_REGULATION_OF_STEROL_TRANSPORT	32.301	4.2361e-20
MYELOID_CELL_APOPTOTIC_PROCESS	32.301	4.2361e-20
LEUKOCYTE_HOMEOSTASIS	12.6039	4.61176e-20
SMALL_GTPASE_MEDIATED_SIGNAL_TRANSDUCTION	4.45171	4.65093e-20
REGULATION_OF_CELLULAR_COMPONENT_SIZE	5.28926	4.68461e-20
RESPONSE_TO_FATTY_ACID	18.9343	5.1219e-20
DNA_BIOSYNTHETIC_PROCESS	7.65957	5.92879e-20
EXTRINSIC_APOPTOTIC_SIGNALING_PATHWAY_VIA_DEATH_DOMAIN_RECEPTORS	14.348	6.21183e-20
GLIAL_CELL_MIGRATION	20.7998	6.43739e-20
NEGATIVE_REGULATION_OF_LYMPHOCYTE_ACTIVATION	8.57845	6.57223e-20
NEGATIVE_REGULATION_OF_BLOOD_VESSEL_ENDOTHELIAL_CELL_MIGRATION	15.4004	7.53158e-20
REGULATION_OF_CELL_MIGRATION_INVOLVED_IN_SPROUTING_ANGIOGENESIS	15.4004	7.53158e-20
ORGANELLE_LOCALIZATION	4.16081	8.09704e-20
BRANCHING_MORPHOGENESIS_OF_AN_EPITHELIAL_TUBE	8.88192	8.28176e-20
HEART_GROWTH	12.2613	8.50057e-20
REGULATION_OF_LYMPHOCYTE_DIFFERENTIATION	7.30216	8.60321e-20
POSITIVE_REGULATION_OF_PROTEIN_BINDING	14.1045	8.7809e-20
CELL_MIGRATION_INVOLVED_IN_SPROUTING_ANGIOGENESIS	13.0831	9.06453e-20
CELLULAR_LIPID_CATABOLIC_PROCESS	7.03385	9.82484e-20
NEGATIVE_REGULATION_OF_TUMOR_NECROSIS_FACTOR_SUPERFAMILY_CYTOKINE_PRODUCTION	15.1098	1.08873e-19
POSITIVE_REGULATION_OF_SIGNALING_RECEPTOR_ACTIVITY	25.7934	1.11954e-19
NEGATIVE_REGULATION_OF_MITOCHONDRION_ORGANIZATION	22.5329	1.1785e-19
NEGATIVE_REGULATION_OF_INTERLEUKIN_1_PRODUCTION	22.5329	1.1785e-19
REGULATION_OF_LEUKOCYTE_MEDIATED_CYTOTOXICITY	13.8691	1.23475e-19
POSITIVE_REGULATION_OF_PROTEIN_LOCALIZATION_TO_NUCLEUS	13.8691	1.23475e-19
REGULATION_OF_DNA_BINDING	10.6379	1.34386e-19
LIPID_MODIFICATION	7.17532	1.46877e-19
RESPONSE_TO_IRON_ION	42.4563	1.52969e-19
LONG_TERM_SYNAPTIC_POTENTIATION	11.9274	1.54291e-19
OLEFINIC_COMPOUND_METABOLIC_PROCESS	8.66829	1.59204e-19
HOMOTYPIC_CELL_CELL_ADHESION	12.6977	1.70642e-19
POSITIVE_REGULATION_OF_ATP_METABOLIC_PROCESS	34.2617	1.78144e-19
POSITIVE_REGULATION_OF_ALPHA_BETA_T_CELL_ACTIVATION	16.0309	1.80927e-19
REGULATION_OF_CELLULAR_RESPONSE_TO_INSULIN_STIMULUS	16.0309	1.80927e-19
PROTEIN_LOCALIZATION_TO_PLASMA_MEMBRANE	5.96646	1.94238e-19
REGULATION_OF_CHOLESTEROL_EFFLUX	21.8058	1.95424e-19
POSITIVE_REGULATION_OF_FIBROBLAST_PROLIFERATION	21.8058	1.95424e-19
PROGRAMMED_NECROTIC_CELL_DEATH	21.8058	1.95424e-19
NEGATIVE_REGULATION_OF_NERVOUS_SYSTEM_DEVELOPMENT	8.99121	1.98268e-19
PHOSPHOLIPASE_C_ACTIVATING_G_PROTEIN_COUPLED_RECEPTOR_SIGNALING_PATHWAY	11.7711	2.06717e-19
REGULATION_OF_NEUROTRANSMITTER_TRANSPORT	11.7711	2.06717e-19
REGULATION_OF_EXOCYTOSIS	7.09317	2.08672e-19
POSITIVE_REGULATION_OF_CHOLESTEROL_EFFLUX	52.0578	2.1703e-19
CELLULAR_RESPONSE_TO_LIGHT_STIMULUS	10.4081	2.26507e-19
NEGATIVE_REGULATION_OF_PROTEIN_BINDING	12.5142	2.32635e-19
POSITIVE_REGULATION_OF_PHAGOCYTOSIS	15.7039	2.64992e-19
LONG_CHAIN_FATTY_ACID_TRANSPORT	17.1669	2.81449e-19
REGULATION_OF_NITRIC_OXIDE_SYNTHASE_ACTIVITY	27.8743	2.88204e-19
DEVELOPMENTAL_CELL_GROWTH	6.77142	3.21583e-19
REGULATION_OF_ACUTE_INFLAMMATORY_RESPONSE	23.8821	3.38488e-19
GRANULOCYTE_ACTIVATION	23.8821	3.38488e-19
VASCULAR_ASSOCIATED_SMOOTH_MUSCLE_CELL_MIGRATION	23.8821	3.38488e-19
POSITIVE_REGULATION_OF_MONOOXYGENASE_ACTIVITY	39.3883	3.39192e-19
RESPONSE_TO_ANGIOTENSIN	39.3883	3.39192e-19
NUCLEAR_TRANSPORT	5.45422	3.63259e-19
GASTRULATION	7.4546	3.77092e-19
REGULATION_OF_NEURON_DIFFERENTIATION	7.4546	3.77092e-19
COLUMNAR_CUBOIDAL_EPITHELIAL_CELL_DIFFERENTIATION	10.7715	3.87253e-19
SIGNAL_TRANSDUCTION_IN_ABSENCE_OF_LIGAND	16.7764	4.21854e-19
POSITIVE_REGULATION_OF_LIPASE_ACTIVITY	16.7764	4.21854e-19
POSITIVE_REGULATION_OF_TRANSPORTER_ACTIVITY	10.077	4.85725e-19
ALPHA_BETA_T_CELL_DIFFERENTIATION	10.6425	5.05026e-19
POSITIVE_REGULATION_OF_INTRACELLULAR_PROTEIN_TRANSPORT	8.62194	5.9181e-19
TELENCEPHALON_DEVELOPMENT	6.24438	6.29886e-19
NEGATIVE_REGULATION_OF_CELL_GROWTH	7.59373	6.50687e-19
REGULATION_OF_MYELOID_CELL_APOPTOTIC_PROCESS	36.738	7.23919e-19
POSITIVE_REGULATION_OF_CELLULAR_CARBOHYDRATE_METABOLIC_PROCESS	19.8813	8.26006e-19
MONOCARBOXYLIC_ACID_TRANSPORT	10.4049	8.51484e-19
NEGATIVE_REGULATION_OF_VASCULAR_ASSOCIATED_SMOOTH_MUSCLE_CELL_PROLIFERATION	25.5706	9.29452e-19
REGULATION_OF_CANONICAL_WNT_SIGNALING_PATHWAY	6.15762	9.9007e-19
NEGATIVE_REGULATION_OF_ORGANELLE_ORGANIZATION	5.08272	1.01139e-18
ANATOMICAL_STRUCTURE_MATURATION	6.3325	1.01279e-18
REGULATION_OF_ACTIN_FILAMENT_BASED_PROCESS	4.79165	1.04539e-18
GLYCEROPHOSPHOLIPID_METABOLIC_PROCESS	5.54238	1.05858e-18
REGULATION_OF_CARDIAC_MUSCLE_CONTRACTION	14.5188	1.14196e-18
NEGATIVE_REGULATION_OF_RESPONSE_TO_CYTOKINE_STIMULUS	12.42	1.17242e-18
RESPONSE_TO_PAIN	43.437	1.25662e-18
CALCIUM_ION_TRANSPORT_INTO_CYTOSOL	43.437	1.25662e-18
LEUKOCYTE_ADHESION_TO_VASCULAR_ENDOTHELIAL_CELL	19.3131	1.30475e-18
IMPORT_ACROSS_PLASMA_MEMBRANE	7.13788	1.32895e-18
REGULATION_OF_G_PROTEIN_COUPLED_RECEPTOR_SIGNALING_PATHWAY	9.15581	1.40754e-18
LYMPHOCYTE_MIGRATION	10.1751	1.4196e-18
NEGATIVE_REGULATION_OF_EPITHELIAL_CELL_APOPTOTIC_PROCESS	17.2422	1.436e-18
MYOTUBE_DIFFERENTIATION	9.57387	1.64643e-18
PLACENTA_DEVELOPMENT	8.64642	1.77476e-18
POSITIVE_REGULATION_OF_MYELOID_CELL_DIFFERENTIATION	11.3583	1.82338e-18
MEMBRANE_PROTEIN_PROTEOLYSIS	18.7766	2.03886e-18
CATECHOLAMINE_SECRETION	18.7766	2.03886e-18
NEGATIVE_REGULATION_OF_PROTEIN_KINASE_B_SIGNALING	18.7766	2.03886e-18
REGULATION_OF_MORPHOGENESIS_OF_AN_EPITHELIUM	16.8314	2.15546e-18
POSITIVE_REGULATION_OF_CYTOKINE_PRODUCTION_INVOLVED_IN_IMMUNE_RESPONSE	13.9902	2.28562e-18
CD4_POSITIVE_ALPHA_BETA_T_CELL_DIFFERENTIATION	12.9145	2.32685e-18
REGULATION_OF_CELL_SIZE	7.53332	2.36419e-18
POSITIVE_REGULATION_OF_STEROID_METABOLIC_PROCESS	40.0371	2.81343e-18
OVULATION_CYCLE	15.0653	2.85137e-18
POSITIVE_REGULATION_OF_PROTEIN_TYROSINE_KINASE_ACTIVITY	18.269	3.15337e-18
ACTIVATION_OF_CYSTEINE_TYPE_ENDOPEPTIDASE_ACTIVITY_INVOLVED_IN_APOPTOTIC_PROCESS	13.74	3.20625e-18
POSITIVE_REGULATION_OF_INTRACELLULAR_TRANSPORT	7.11815	3.99545e-18
GLIAL_CELL_PROLIFERATION	20.1497	4.14132e-18
BLOOD_VESSEL_REMODELING	22.7286	4.70263e-18
NEGATIVE_REGULATION_OF_LIPID_STORAGE	65.404	4.80719e-18
MITOCHONDRIAL_TRANSPORT	7.33147	4.92934e-18
ORGANIC_CYCLIC_COMPOUND_CATABOLIC_PROCESS	4.11652	5.01935e-18
BODY_FLUID_SECRETION	12.3205	5.90291e-18
VESICLE_MEDIATED_TRANSPORT_IN_SYNAPSE	6.76804	6.19186e-18
POSITIVE_REGULATION_OF_NEURON_PROJECTION_DEVELOPMENT	8.22731	6.24007e-18
POSITIVE_REGULATION_OF_RECEPTOR_MEDIATED_ENDOCYTOSIS	19.539	6.57316e-18
MULTICELLULAR_ORGANISM_GROWTH	8.59742	6.59436e-18
POSITIVE_REGULATION_OF_INSULIN_SECRETION	15.7101	6.94545e-18
ACYLGLYCEROL_HOMEOSTASIS	25.3303	7.71377e-18
INTERLEUKIN_17_PRODUCTION	21.9167	7.81988e-18
REGULATION_OF_GLIAL_CELL_DIFFERENTIATION	14.196	8.27454e-18
POSITIVE_REGULATION_OF_LYMPHOCYTE_MEDIATED_IMMUNITY	9.94045	8.79703e-18
NEGATIVE_REGULATION_OF_LIPID_METABOLIC_PROCESS	10.5258	9.27703e-18
POSITIVE_REGULATION_OF_CELL_DIVISION	11.9461	1.07422e-17
POSITIVE_REGULATION_OF_MUSCLE_HYPERTROPHY	29.0198	1.09255e-17
POSITIVE_REGULATION_OF_GLUCOSE_IMPORT	29.0198	1.09255e-17
CELLULAR_MACROMOLECULE_CATABOLIC_PROCESS	3.03008	1.12506e-17
POSITIVE_REGULATION_OF_INTERFERON_GAMMA_PRODUCTION	13.9278	1.16592e-17
POSITIVE_REGULATION_OF_LYMPHOCYTE_DIFFERENTIATION	9.25827	1.24608e-17
POSITIVE_REGULATION_OF_MUSCLE_CONTRACTION	21.1608	1.28166e-17
POSITIVE_REGULATION_OF_EPITHELIAL_CELL_APOPTOTIC_PROCESS	24.2745	1.34067e-17
ASTROCYTE_ACTIVATION	57.2948	1.34109e-17
HINDBRAIN_DEVELOPMENT	8.30794	1.52826e-17
GLYCEROLIPID_BIOSYNTHETIC_PROCESS	5.9735	1.5506e-17
REGULATION_OF_CARBOHYDRATE_CATABOLIC_PROCESS	18.4223	1.60063e-17
PEPTIDYL_LYSINE_MODIFICATION	4.54266	1.6271e-17
NEGATIVE_REGULATION_OF_CELL_CYCLE	4.60667	1.90535e-17
REGULATION_OF_DEPHOSPHORYLATION	9.07638	1.96691e-17
REGULATION_OF_JNK_CASCADE	8.6233	1.97744e-17
CARBOHYDRATE_DERIVATIVE_BIOSYNTHETIC_PROCESS	3.59861	2.23837e-17
TRANSFORMING_GROWTH_FACTOR_BETA_RECEPTOR_SIGNALING_PATHWAY	6.46933	2.26715e-17
T_CELL_DIFFERENTIATION_INVOLVED_IN_IMMUNE_RESPONSE	13.4207	2.27538e-17
REGULATION_OF_CD4_POSITIVE_ALPHA_BETA_T_CELL_ACTIVATION	13.4207	2.27538e-17
REGULATION_OF_MACROPHAGE_MIGRATION	23.3033	2.28895e-17
POSITIVE_REGULATION_OF_LIPID_CATABOLIC_PROCESS	40.7985	2.33183e-17
REGULATION_OF_B_CELL_ACTIVATION	6.92139	2.39642e-17
TRANSITION_METAL_ION_HOMEOSTASIS	8.54617	2.44835e-17
RESPONSE_TO_GAMMA_RADIATION	17.9105	2.45822e-17
POSITIVE_REGULATION_OF_DNA_BINDING	17.9105	2.45822e-17
NEGATIVE_REGULATION_OF_AMYLOID_PRECURSOR_PROTEIN_CATABOLIC_PROCESS	32.5341	2.50315e-17
REGULATION_OF_EPITHELIAL_CELL_DIFFERENTIATION	7.78703	2.50682e-17
REGULATION_OF_PROTEIN_TYROSINE_KINASE_ACTIVITY	11.4356	2.55754e-17
NEGATIVE_REGULATION_OF_LEUKOCYTE_PROLIFERATION	11.4356	2.55754e-17
REGULATION_OF_PROTEIN_UBIQUITINATION	6.66193	2.5752e-17
CELL_CYCLE_PHASE_TRANSITION	3.85445	2.61668e-17
FEMALE_SEX_DIFFERENTIATION	9.4148	2.93183e-17
PLATELET_AGGREGATION	14.4278	2.9843e-17
POSITIVE_REGULATION_OF_SUPRAMOLECULAR_FIBER_ORGANIZATION	7.40239	3.10384e-17
HEART_MORPHOGENESIS	5.83448	3.16973e-17
SENSORY_ORGAN_MORPHOGENESIS	5.6681	3.30018e-17
REGULATION_OF_STRIATED_MUSCLE_CONTRACTION	11.2746	3.38863e-17
CARBOHYDRATE_CATABOLIC_PROCESS	8.03736	3.44298e-17
INFLAMMATORY_CELL_APOPTOTIC_PROCESS	50.913	3.47023e-17
REGULATION_OF_CELL_MATRIX_ADHESION	9.31654	3.70204e-17
REGULATION_OF_DNA_BIOSYNTHETIC_PROCESS	9.31654	3.70204e-17
NEURON_MIGRATION	7.35057	3.72541e-17
BONE_REMODELING	12.0166	4.00419e-17
REGULATION_OF_ALPHA_BETA_T_CELL_DIFFERENTIATION	14.1389	4.22591e-17
TOLL_LIKE_RECEPTOR_SIGNALING_PATHWAY	9.22031	4.66341e-17
LOW_DENSITY_LIPOPROTEIN_PARTICLE_CLEARANCE	30.6202	4.85707e-17
NEGATIVE_REGULATION_OF_DNA_BINDING_TRANSCRIPTION_FACTOR_ACTIVITY	6.98497	5.10376e-17
NEGATIVE_REGULATION_OF_CARBOHYDRATE_METABOLIC_PROCESS	19.1767	5.21217e-17
EMBRYO_IMPLANTATION	16.9621	5.62902e-17
NEGATIVE_REGULATION_OF_SMALL_MOLECULE_METABOLIC_PROCESS	10.2685	5.84829e-17
ERBB_SIGNALING_PATHWAY	9.12604	5.86065e-17
SMOOTH_MUSCLE_CELL_DIFFERENTIATION	13.8613	5.94713e-17
POSITIVE_REGULATION_OF_MUSCLE_CELL_DIFFERENTIATION	12.7257	5.95783e-17
REGULATION_OF_LONG_TERM_SYNAPTIC_POTENTIATION	21.5768	6.35143e-17
REGULATION_OF_LEUKOCYTE_ADHESION_TO_VASCULAR_ENDOTHELIAL_CELL	25.0701	6.39966e-17
REGULATION_OF_NUCLEOCYTOPLASMIC_TRANSPORT	10.142	7.53914e-17
CELLULAR_RESPONSE_TO_ALCOHOL	10.8194	7.71022e-17
POSITIVE_REGULATION_OF_CELLULAR_AMIDE_METABOLIC_PROCESS	7.44216	7.77685e-17
REGULATION_OF_GLUCONEOGENESIS	18.5955	8.12008e-17
CELL_CYCLE_G1_S_PHASE_TRANSITION	5.50003	8.44839e-17
IMMUNE_RESPONSE_REGULATING_CELL_SURFACE_RECEPTOR_SIGNALING_PATHWAY	4.98381	8.82222e-17
ADP_METABOLIC_PROCESS	11.4803	9.57537e-17
DEFENSE_RESPONSE_TO_GRAM_NEGATIVE_BACTERIUM	11.4803	9.57537e-17
POSITIVE_REGULATION_OF_PROTEIN_LOCALIZATION_TO_MEMBRANE	10.6705	1.00697e-16
MEMBRANE_PROTEIN_ECTODOMAIN_PROTEOLYSIS	20.8061	1.03422e-16
ENDOCRINE_PANCREAS_DEVELOPMENT	20.8061	1.03422e-16
NEGATIVE_REGULATION_OF_LIPID_TRANSPORT	20.8061	1.03422e-16
CONNECTIVE_TISSUE_REPLACEMENT	61.0336	1.03582e-16
LEARNING	8.04272	1.03662e-16
POSITIVE_REGULATION_OF_LEUKOCYTE_APOPTOTIC_PROCESS	34.9882	1.04937e-16
NEGATIVE_REGULATION_OF_SMOOTH_MUSCLE_CELL_MIGRATION	23.9799	1.10673e-16
REGULATION_OF_OSTEOBLAST_DIFFERENTIATION	8.41517	1.12104e-16
BONE_DEVELOPMENT	6.09904	1.22474e-16
PHENOL_CONTAINING_COMPOUND_METABOLIC_PROCESS	9.90175	1.24177e-16
ICOSANOID_BIOSYNTHETIC_PROCESS	16.1146	1.24254e-16
NEGATIVE_REGULATION_OF_COAGULATION	18.0485	1.25099e-16
POSITIVE_REGULATION_OF_CALCIUM_ION_TRANSMEMBRANE_TRANSPORT	11.3117	1.27008e-16
NUCLEOTIDE_PHOSPHORYLATION	10.5315	1.31067e-16
MAMMARY_GLAND_EPITHELIUM_DEVELOPMENT	14.3779	1.52592e-16
B_CELL_DIFFERENTIATION	7.90961	1.54092e-16
SIGNAL_TRANSDUCTION_BY_P53_CLASS_MEDIATOR	7.23085	1.60788e-16
POSITIVE_REGULATION_OF_STRESS_ACTIVATED_PROTEIN_KINASE_SIGNALING_CASCADE	8.68227	1.77609e-16
NEPHRON_DEVELOPMENT	7.8447	1.87397e-16
POSITIVE_REGULATION_OF_INTERLEUKIN_12_PRODUCTION	22.9805	1.87892e-16
RESPONSE_TO_DEXAMETHASONE	22.9805	1.87892e-16
RESPONSE_TO_MUSCLE_STRETCH	41.7046	1.93083e-16
ACTIVATION_OF_PROTEIN_KINASE_B_ACTIVITY	32.6288	2.10423e-16
REGULATION_OF_SYSTEMIC_ARTERIAL_BLOOD_PRESSURE_MEDIATED_BY_A_CHEMICAL_SIGNAL	19.4189	2.63111e-16
POSITIVE_REGULATION_OF_DEPHOSPHORYLATION	15.3475	2.65173e-16
REGULATION_OF_CD4_POSITIVE_ALPHA_BETA_T_CELL_DIFFERENTIATION	17.0401	2.87738e-16
ENDOCRINE_HORMONE_SECRETION	17.0401	2.87738e-16
ICOSANOID_TRANSPORT	17.0401	2.87738e-16
CELLULAR_RESPONSE_TO_CADMIUM_ION	26.027	3.0232e-16
CIRCADIAN_REGULATION_OF_GENE_EXPRESSION	13.7903	3.03346e-16
REGULATION_OF_REGULATED_SECRETORY_PATHWAY	8.0488	3.12081e-16
REGULATION_OF_TRIGLYCERIDE_METABOLIC_PROCESS	22.0611	3.13522e-16
REGULATION_OF_AXONOGENESIS	7.6562	3.33783e-16
POSITIVE_REGULATION_OF_CELL_SUBSTRATE_ADHESION	8.89595	3.42947e-16
PROTEIN_STABILIZATION	6.25787	3.72734e-16
CELLULAR_RESPONSE_TO_CORTICOSTEROID_STIMULUS	14.9906	3.82828e-16
ADENYLATE_CYCLASE_ACTIVATING_G_PROTEIN_COUPLED_RECEPTOR_SIGNALING_PATHWAY	7.59537	4.03317e-16
SMOOTH_MUSCLE_CELL_APOPTOTIC_PROCESS	30.5984	4.08336e-16
CELLULAR_TRANSITION_METAL_ION_HOMEOSTASIS	9.34398	4.11622e-16
MACROPHAGE_DIFFERENTIATION	18.7924	4.11673e-16
ACTIVATION_OF_JANUS_KINASE_ACTIVITY	122.014	4.55083e-16
RESPONSE_TO_CALCIUM_ION	7.91105	4.64102e-16
REGULATION_OF_EPITHELIAL_TO_MESENCHYMAL_TRANSITION	9.88106	4.66568e-16
CELLULAR_RESPONSE_TO_UV	11.3528	4.75987e-16
NEGATIVE_REGULATION_OF_INTERLEUKIN_1_BETA_PRODUCTION	21.2125	5.14729e-16
REGULATION_OF_POLYSACCHARIDE_METABOLIC_PROCESS	21.2125	5.14729e-16
REGULATION_OF_CELL_CYCLE_PHASE_TRANSITION	4.14075	5.24101e-16
INSULIN_LIKE_GROWTH_FACTOR_RECEPTOR_SIGNALING_PATHWAY	24.7873	5.30754e-16
REGULATION_OF_SMOOTH_MUSCLE_CONTRACTION	14.6504	5.48564e-16
STRIATED_MUSCLE_CELL_PROLIFERATION	12.1905	5.55315e-16
GLANDULAR_EPITHELIAL_CELL_DIFFERENTIATION	13.249	5.88225e-16
ENDOMEMBRANE_SYSTEM_ORGANIZATION	3.625	6.01085e-16
REGULATION_OF_NEURAL_PRECURSOR_CELL_PROLIFERATION	11.1808	6.29521e-16
ACTIVATED_T_CELL_PROLIFERATION	18.2051	6.36471e-16
POSITIVE_REGULATION_OF_ANION_TRANSPORT	18.2051	6.36471e-16
AMINE_METABOLIC_PROCESS	9.13826	6.52603e-16
REGULATION_OF_RAS_PROTEIN_SIGNAL_TRANSDUCTION	6.56815	6.85003e-16
REGULATION_OF_RESPONSE_TO_ENDOPLASMIC_RETICULUM_STRESS	11.9763	7.48568e-16
DEVELOPMENT_OF_PRIMARY_FEMALE_SEXUAL_CHARACTERISTICS	9.64255	7.59031e-16
REGULATION_OF_CALCIUM_ION_IMPORT	28.7868	7.69093e-16
REGULATION_OF_FATTY_ACID_TRANSPORT	28.7868	7.69093e-16
NEGATIVE_REGULATION_OF_OXIDATIVE_STRESS_INDUCED_INTRINSIC_APOPTOTIC_SIGNALING_PATHWAY	66.0296	7.86505e-16
MITOCHONDRIAL_MEMBRANE_ORGANIZATION	9.03877	8.18639e-16
CELLULAR_RESPONSE_TO_UNFOLDED_PROTEIN	10.2547	8.26711e-16
REGULATION_OF_CELL_MORPHOGENESIS	4.98015	8.57945e-16
NITRIC_OXIDE_MEDIATED_SIGNAL_TRANSDUCTION	35.307	8.81076e-16
DEVELOPMENTAL_GROWTH_INVOLVED_IN_MORPHOGENESIS	5.84189	9.93654e-16
REGULATION_OF_PHOSPHOLIPASE_ACTIVITY	14.0127	1.10256e-15
CELLULAR_EXTRAVASATION	12.7484	1.11442e-15
ORGANIC_ACID_CATABOLIC_PROCESS	5.62967	1.18881e-15
POSITIVE_REGULATION_OF_T_CELL_MEDIATED_IMMUNITY	15.337	1.35934e-15
MATERNAL_PROCESS_INVOLVED_IN_FEMALE_PREGNANCY	15.337	1.35934e-15
REGULATION_OF_PROTEIN_DEPHOSPHORYLATION	10.6917	1.42246e-15
RESPONSE_TO_COLD	17.1285	1.47123e-15
NEGATIVE_REGULATION_OF_MUSCLE_CELL_APOPTOTIC_PROCESS	17.1285	1.47123e-15
REGULATION_OF_GRANULOCYTE_CHEMOTAXIS	17.1285	1.47123e-15
REGULATION_OF_HEART_GROWTH	12.5132	1.52131e-15
GLYCEROLIPID_CATABOLIC_PROCESS	13.7142	1.54732e-15
BONE_MINERALIZATION	8.75289	1.59271e-15
REGULATION_OF_CELL_CYCLE_G1_S_PHASE_TRANSITION	6.11404	1.73391e-15
POSITIVE_REGULATION_OF_RESPONSE_TO_BIOTIC_STIMULUS	6.57652	1.73827e-15
NEURON_PROJECTION_GUIDANCE	5.72494	1.74056e-15
HIGH_DENSITY_LIPOPROTEIN_PARTICLE_REMODELING	91.7915	1.76707e-15
RESPONSE_TO_OXYGEN_RADICAL	32.7516	1.77101e-15
SENSORY_PERCEPTION	2.86805	2.0584e-15
REGULATION_OF_IMMUNOGLOBULIN_PRODUCTION	12.2876	2.06582e-15
PHOSPHATIDYLCHOLINE_METABOLIC_PROCESS	12.2876	2.06582e-15
REGULATION_OF_GLYCOLYTIC_PROCESS	19.0179	2.08558e-15
RHYTHMIC_BEHAVIOR	19.0179	2.08558e-15
NEGATIVE_REGULATION_OF_CHEMOTAXIS	13.4282	2.15751e-15
POSITIVE_REGULATION_OF_IMMUNOGLOBULIN_PRODUCTION	16.6392	2.20198e-15
REGULATION_OF_BIOMINERALIZATION	9.73486	2.23842e-15
REGULATION_OF_HISTONE_MODIFICATION	6.76677	2.28476e-15
RIBONUCLEOSIDE_DIPHOSPHATE_METABOLIC_PROCESS	9.09376	2.44034e-15
REGULATION_OF_POSTSYNAPTIC_MEMBRANE_POTENTIAL	7.70811	2.50294e-15
POSITIVE_REGULATION_OF_MUSCLE_CELL_APOPTOTIC_PROCESS	25.767	2.51939e-15
POSITIVE_REGULATION_OF_INTERLEUKIN_10_PRODUCTION	21.6884	2.55288e-15
ACTIN_FILAMENT_ORGANIZATION	4.02902	2.61262e-15
REGULATION_OF_TOLL_LIKE_RECEPTOR_SIGNALING_PATHWAY	12.0607	2.79092e-15
HETEROTYPIC_CELL_CELL_ADHESION	14.6071	2.80923e-15
NEGATIVE_REGULATION_OF_INTERLEUKIN_6_PRODUCTION	13.1539	2.98965e-15
KIDNEY_EPITHELIUM_DEVELOPMENT	7.64216	3.02891e-15
NEGATIVE_REGULATION_OF_DEVELOPMENTAL_GROWTH	8.99142	3.05811e-15
BLOOD_VESSEL_ENDOTHELIAL_CELL_PROLIFERATION_INVOLVED_IN_SPROUTING_ANGIOGENESIS	16.1776	3.26349e-15
CATECHOL_CONTAINING_COMPOUND_METABOLIC_PROCESS	16.1776	3.26349e-15
POSITIVE_REGULATION_OF_MACROPHAGE_ACTIVATION	30.5766	3.43708e-15
POSITIVE_REGULATION_OF_COAGULATION	30.5766	3.43708e-15
STEROID_HORMONE_MEDIATED_SIGNALING_PATHWAY	7.98873	3.45379e-15
IMPORT_INTO_NUCLEUS	6.9315	3.48129e-15
NEGATIVE_REGULATION_OF_RESPONSE_TO_BIOTIC_STIMULUS	8.89137	3.82265e-15
LIPID_OXIDATION	8.89137	3.82265e-15
BONE_RESORPTION	14.267	3.99251e-15
LYMPHOCYTE_CHEMOTAXIS	14.267	3.99251e-15
POSITIVE_REGULATION_OF_GLUCOSE_METABOLIC_PROCESS	20.8208	4.16107e-15
POSITIVE_REGULATION_OF_MORPHOGENESIS_OF_AN_EPITHELIUM	24.4784	4.40016e-15
POSITIVE_REGULATION_OF_B_CELL_ACTIVATION	7.51016	4.41343e-15
PROTEIN_ACETYLATION	5.70952	4.41374e-15
CALCIUM_ION_IMPORT	17.7909	4.96424e-15
REGULATION_OF_REACTIVE_OXYGEN_SPECIES_BIOSYNTHETIC_PROCESS	17.7909	4.96424e-15
LYMPHOCYTE_APOPTOTIC_PROCESS	11.6465	5.0195e-15
POSITIVE_REGULATION_OF_CYTOSKELETON_ORGANIZATION	6.29133	5.2486e-15
NEGATIVE_REGULATION_OF_AUTOPHAGY	10.7046	5.34779e-15
EXTRACELLULAR_MATRIX_DISASSEMBLY	13.9424	5.63328e-15
T_CELL_MIGRATION	12.6375	5.63905e-15
RESPONSE_TO_RETINOIC_ACID	9.26495	5.77572e-15
REGULATION_OF_PATTERN_RECOGNITION_RECEPTOR_SIGNALING_PATHWAY	9.26495	5.77572e-15
INFLAMMATORY_RESPONSE_TO_WOUNDING	73.2059	5.83227e-15
REGULATION_OF_REPRODUCTIVE_PROCESS	6.03771	5.92736e-15
PROTEIN_ACYLATION	5.16108	6.25088e-15
DEPHOSPHORYLATION	4.4639	6.65346e-15
SUPEROXIDE_ANION_GENERATION	20.02	6.67677e-15
POSITIVE_REGULATION_OF_AMINE_TRANSPORT	20.02	6.67677e-15
INTRINSIC_APOPTOTIC_SIGNALING_PATHWAY_BY_P53_CLASS_MEDIATOR	11.4495	6.6841e-15
CARDIAC_CELL_DEVELOPMENT	10.5466	6.96749e-15
PROTEOLYSIS_INVOLVED_IN_PROTEIN_CATABOLIC_PROCESS	3.10525	7.29717e-15
REGULATION_OF_HETEROTYPIC_CELL_CELL_ADHESION	35.6818	7.40581e-15
REGULATION_OF_POSITIVE_CHEMOTAXIS	35.6818	7.40581e-15
NEUTROPHIL_MEDIATED_IMMUNITY	23.3126	7.52232e-15
COLUMNAR_CUBOIDAL_EPITHELIAL_CELL_DEVELOPMENT	17.2294	7.52505e-15
REGULATION_OF_FATTY_ACID_BIOSYNTHETIC_PROCESS	17.2294	7.52505e-15
TISSUE_REGENERATION	12.3965	7.6788e-15
NEGATIVE_REGULATION_OF_SYNAPTIC_TRANSMISSION	12.3965	7.6788e-15
CELLULAR_RESPONSE_TO_MECHANICAL_STIMULUS	12.3965	7.6788e-15
CELL_CELL_JUNCTION_ORGANIZATION	5.9692	7.94258e-15
PALLIUM_DEVELOPMENT	6.68836	8.06508e-15
ORGANELLE_FISSION	3.67631	8.07401e-15
REGULATION_OF_RELEASE_OF_SEQUESTERED_CALCIUM_ION_INTO_CYTOSOL	11.2589	8.86047e-15
RESPONSE_TO_FIBROBLAST_GROWTH_FACTOR	8.51251	9.10981e-15
NEUROTRANSMITTER_SECRETION	7.26582	9.19022e-15
SKELETAL_MUSCLE_ORGAN_DEVELOPMENT	6.64176	9.50479e-15
PLATELET_DERIVED_GROWTH_FACTOR_RECEPTOR_SIGNALING_PATHWAY	14.9343	1.0059e-14
POSITIVE_REGULATION_OF_DNA_BIOSYNTHETIC_PROCESS	12.1643	1.03996e-14
MONOVALENT_INORGANIC_CATION_HOMEOSTASIS	6.90369	1.04384e-14
POSITIVE_REGULATION_OF_SMOOTH_MUSCLE_CELL_MIGRATION	19.2785	1.05566e-14
STEROL_BIOSYNTHETIC_PROCESS	13.3356	1.09857e-14
POSITIVE_REGULATION_OF_CELL_KILLING	13.3356	1.09857e-14
POSITIVE_REGULATION_OF_TRANSMEMBRANE_RECEPTOR_PROTEIN_SERINE_THREONINE_KINASE_SIGNALING_PATHWAY	8.42279	1.1253e-14
APOPTOTIC_CELL_CLEARANCE	16.7072	1.12825e-14
NEGATIVE_REGULATION_OF_CHOLESTEROL_STORAGE	304.683	1.15891e-14
REGULATION_OF_CALCIUM_MEDIATED_SIGNALING	11.0744	1.16938e-14
RESPONSE_TO_ATP	26.9883	1.18036e-14
NUCLEOSIDE_DIPHOSPHATE_METABOLIC_PROCESS	7.91835	1.268e-14
RESPONSE_TO_MANGANESE_ION	44.0651	1.31845e-14
NEGATIVE_REGULATION_OF_TISSUE_REMODELING	44.0651	1.31845e-14
NITRIC_OXIDE_SYNTHASE_BIOSYNTHETIC_PROCESS	44.0651	1.31845e-14
CELLULAR_RESPONSE_TO_LOW_DENSITY_LIPOPROTEIN_PARTICLE_STIMULUS	44.0651	1.31845e-14
MITOTIC_CELL_CYCLE_PHASE_TRANSITION	3.84558	1.39262e-14
NEGATIVE_REGULATION_OF_CALCIUM_ION_TRANSPORT	11.9315	1.40106e-14
POSITIVE_REGULATION_OF_MYELOID_LEUKOCYTE_DIFFERENTIATION	14.5606	1.43933e-14
NEGATIVE_REGULATION_OF_MAP_KINASE_ACTIVITY	14.5606	1.43933e-14
NEGATIVE_REGULATION_OF_FAT_CELL_DIFFERENTIATION	14.5606	1.43933e-14
REGULATION_OF_PROTEOLYSIS_INVOLVED_IN_PROTEIN_CATABOLIC_PROCESS	5.63405	1.47194e-14
NEGATIVE_REGULATION_OF_CHEMOKINE_PRODUCTION	32.8967	1.49273e-14
STEROID_HORMONE_SECRETION	32.8967	1.49273e-14
NEGATIVE_REGULATION_OF_BLOOD_CIRCULATION	32.8967	1.49273e-14
ACTION_POTENTIAL	7.43395	1.60021e-14
REGULATION_OF_CALCIUM_ION_TRANSPORT_INTO_CYTOSOL	60.945	1.6985e-14
REGULATION_OF_PROTEIN_LOCALIZATION_TO_PLASMA_MEMBRANE	9.33868	1.71564e-14
HISTONE_MODIFICATION	3.80907	1.95662e-14
REGULATION_OF_ENDOCRINE_PROCESS	21.2852	2.07422e-14
REGULATION_OF_LYMPHOCYTE_MIGRATION	12.7795	2.08762e-14
REGULATION_OF_RENAL_SYSTEM_PROCESS	25.4806	2.0999e-14
MULTICELLULAR_ORGANISMAL_SIGNALING	6.65459	2.40979e-14
REGULATION_OF_NECROTIC_CELL_DEATH	15.7535	2.45932e-14
POSITIVE_REGULATION_OF_ALPHA_BETA_T_CELL_DIFFERENTIATION	15.7535	2.45932e-14
REGULATION_OF_CYCLASE_ACTIVITY	11.5068	2.50467e-14
MAMMARY_GLAND_MORPHOGENESIS	17.9489	2.53324e-14
REGULATION_OF_PROTEIN_LOCALIZATION_TO_CELL_PERIPHERY	8.08214	2.56306e-14
POSITIVE_REGULATION_OF_JNK_CASCADE	9.67932	3.15908e-14
VASCULAR_ASSOCIATED_SMOOTH_MUSCLE_CELL_DIFFERENTIATION	20.3983	3.35435e-14
MACROPHAGE_CHEMOTAXIS	20.3983	3.35435e-14
RESPONSE_TO_OSMOTIC_STRESS	10.3922	3.40297e-14
REGULATION_OF_HEART_RATE	8.99652	3.40986e-14
EAR_DEVELOPMENT	5.61595	3.72787e-14
ENDOTHELIAL_CELL_DEVELOPMENT	12.2712	3.87272e-14
POSITIVE_REGULATION_OF_NUCLEOCYTOPLASMIC_TRANSPORT	13.5437	4.02694e-14
HIGH_DENSITY_LIPOPROTEIN_PARTICLE_CLEARANCE	83.8451	4.17922e-14
PROTEASOMAL_PROTEIN_CATABOLIC_PROCESS	3.61681	4.25117e-14
IRON_ION_HOMEOSTASIS	10.2341	4.40101e-14
DETECTION_OF_ABIOTIC_STIMULUS	7.41973	4.81858e-14
POSITIVE_REGULATION_OF_PHOSPHOLIPASE_ACTIVITY	14.9029	5.16119e-14
RESPONSE_TO_TUMOR_CELL	19.5824	5.33775e-14
NEGATIVE_REGULATION_OF_PEPTIDE_SECRETION	19.5824	5.33775e-14
DOPAMINE_METABOLIC_PROCESS	19.5824	5.33775e-14
CELL_REDOX_HOMEOSTASIS	19.5824	5.33775e-14
NEUTRAL_LIPID_CATABOLIC_PROCESS	19.5824	5.33775e-14
POSITIVE_REGULATION_OF_BLOOD_CIRCULATION	19.5824	5.33775e-14
B_CELL_MEDIATED_IMMUNITY	5.72311	5.45276e-14
REGULATION_OF_SMALL_GTPASE_MEDIATED_SIGNAL_TRANSDUCTION	4.65684	5.72359e-14
POSITIVE_REGULATION_OF_ORGANIC_ACID_TRANSPORT	16.7853	5.78462e-14
REGULATION_OF_BONE_REMODELING	16.7853	5.78462e-14
RESPONSE_TO_NERVE_GROWTH_FACTOR	16.7853	5.78462e-14
SKELETAL_SYSTEM_MORPHOGENESIS	5.49798	6.37857e-14
SULFUR_COMPOUND_METABOLIC_PROCESS	4.42783	6.39026e-14
TRIGLYCERIDE_RICH_LIPOPROTEIN_PARTICLE_REMODELING	152.694	6.75273e-14
CELLULAR_RESPONSE_TO_TOPOLOGICALLY_INCORRECT_PROTEIN	8.09329	7.71679e-14
DEFENSE_RESPONSE_TO_GRAM_POSITIVE_BACTERIUM	8.09329	7.71679e-14
INTESTINAL_ABSORPTION	18.8292	8.36646e-14
NEGATIVE_REGULATION_OF_STRIATED_MUSCLE_CELL_DIFFERENTIATION	18.8292	8.36646e-14
POSITIVE_REGULATION_OF_LYMPHOCYTE_MIGRATION	18.8292	8.36646e-14
PROSTANOID_METABOLIC_PROCESS	16.2615	8.59397e-14
REGULATION_OF_MITOTIC_CELL_CYCLE_PHASE_TRANSITION	4.28692	8.79719e-14
NEGATIVE_REGULATION_OF_CYSTEINE_TYPE_ENDOPEPTIDASE_ACTIVITY	9.78891	9.31238e-14
REGULATION_OF_SYNAPSE_STRUCTURE_OR_ACTIVITY	5.59707	9.43867e-14
SMAD_PROTEIN_SIGNAL_TRANSDUCTION	10.5626	9.86485e-14
T_CELL_LINEAGE_COMMITMENT	26.7395	9.89224e-14
INTERLEUKIN_1_MEDIATED_SIGNALING_PATHWAY	26.7395	9.89224e-14
POLYSACCHARIDE_METABOLIC_PROCESS	8.47887	1.01513e-13
VITAMIN_METABOLIC_PROCESS	8.47887	1.01513e-13
NEGATIVE_REGULATION_OF_PROTEIN_CATABOLIC_PROCESS	8.47887	1.01513e-13
POSITIVE_REGULATION_OF_UBIQUITIN_DEPENDENT_PROTEIN_CATABOLIC_PROCESS	8.47887	1.01513e-13
REGULATION_OF_MULTICELLULAR_ORGANISM_GROWTH	12.6596	1.05788e-13
REGULATION_OF_MICROGLIAL_CELL_ACTIVATION	45.7511	1.08613e-13
POST_EMBRYONIC_DEVELOPMENT	9.64886	1.18716e-13
CELLULAR_RESPONSE_TO_OXYGEN_RADICAL	33.0695	1.2604e-13
VASCULAR_ENDOTHELIAL_GROWTH_FACTOR_SIGNALING_PATHWAY	15.7692	1.26335e-13
REGULATION_OF_EXTRINSIC_APOPTOTIC_SIGNALING_PATHWAY_VIA_DEATH_DOMAIN_RECEPTORS	15.7692	1.26335e-13
REGULATION_OF_T_HELPER_CELL_DIFFERENTIATION	18.1319	1.29287e-13
REGULATION_OF_SMOOTH_MUSCLE_CELL_DIFFERENTIATION	18.1319	1.29287e-13
LOW_DENSITY_LIPOPROTEIN_PARTICLE_REMODELING	67.2164	1.29848e-13
BEHAVIORAL_RESPONSE_TO_PAIN	67.2164	1.29848e-13
CELLULAR_IRON_ION_HOMEOSTASIS	12.3925	1.44113e-13
RESPONSE_TO_FUNGUS	12.3925	1.44113e-13
POSITIVE_REGULATION_OF_MACROAUTOPHAGY	11.151	1.6504e-13
NEGATIVE_REGULATION_OF_REPRODUCTIVE_PROCESS	11.151	1.6504e-13
REGULATION_OF_PHOSPHATASE_ACTIVITY	10.2272	1.65679e-13
MODULATION_BY_HOST_OF_SYMBIONT_PROCESS	10.2272	1.65679e-13
GLANDULAR_EPITHELIAL_CELL_DEVELOPMENT	20.8474	1.68117e-13
EXCRETION	20.8474	1.68117e-13
NEGATIVE_REGULATION_OF_ENDOTHELIAL_CELL_APOPTOTIC_PROCESS	20.8474	1.68117e-13
TRIGLYCERIDE_CATABOLIC_PROCESS	25.1631	1.75066e-13
NEGATIVE_REGULATION_OF_TRANSMEMBRANE_RECEPTOR_PROTEIN_SERINE_THREONINE_KINASE_SIGNALING_PATHWAY	6.63255	1.82499e-13
OVULATION_CYCLE_PROCESS	15.3055	1.83862e-13
EPIDERMIS_DEVELOPMENT	4.17862	1.91103e-13
CELLULAR_RESPONSE_TO_HEAT	12.1361	1.95144e-13
NEUROTRANSMITTER_UPTAKE	17.4789	1.97133e-13
INTRINSIC_APOPTOTIC_SIGNALING_PATHWAY_IN_RESPONSE_TO_DNA_DAMAGE_BY_P53_CLASS_MEDIATOR	17.4789	1.97133e-13
REGULATION_OF_DIGESTIVE_SYSTEM_PROCESS	17.4789	1.97133e-13
POSITIVE_REGULATION_OF_MITOTIC_NUCLEAR_DIVISION	17.4789	1.97133e-13
T_HELPER_17_TYPE_IMMUNE_RESPONSE	17.4789	1.97133e-13
TRANSITION_METAL_ION_TRANSPORT	8.72208	1.9816e-13
CELLULAR_AMINO_ACID_METABOLIC_PROCESS	4.68301	2.01258e-13
STRIATED_MUSCLE_CELL_APOPTOTIC_PROCESS	13.4476	2.05484e-13
REGULATION_OF_PROTEIN_IMPORT_INTO_NUCLEUS	13.4476	2.05484e-13
POSITIVE_REGULATION_OF_NUCLEAR_DIVISION	13.4476	2.05484e-13
POSITIVE_REGULATION_OF_PROTEOLYSIS_INVOLVED_IN_PROTEIN_CATABOLIC_PROCESS	7.27018	2.09007e-13
POSITIVE_REGULATION_OF_PROTEIN_MODIFICATION_BY_SMALL_PROTEIN_CONJUGATION_OR_REMOVAL	7.27018	2.09007e-13
EYE_MORPHOGENESIS	6.58177	2.14819e-13
REGULATION_OF_LYASE_ACTIVITY	10.9518	2.17276e-13
REGULATION_OF_MEMBRANE_PERMEABILITY	10.9518	2.17276e-13
REGULATION_OF_UBIQUITIN_DEPENDENT_PROTEIN_CATABOLIC_PROCESS	6.2918	2.18791e-13
NEGATIVE_REGULATION_OF_ION_TRANSMEMBRANE_TRANSPORT	8.10587	2.32368e-13
NEGATIVE_REGULATION_OF_LIPID_CATABOLIC_PROCESS	30.5331	2.44674e-13
POSITIVE_REGULATION_OF_MACROPHAGE_MIGRATION	30.5331	2.44674e-13
PEPTIDYL_TYROSINE_AUTOPHOSPHORYLATION	40.6824	2.46021e-13
POSITIVE_REGULATION_OF_GLYCOLYTIC_PROCESS	40.6824	2.46021e-13
NEGATIVE_REGULATION_OF_RELEASE_OF_CYTOCHROME_C_FROM_MITOCHONDRIA	40.6824	2.46021e-13
REGULATION_OF_ACTIN_FILAMENT_ORGANIZATION	4.76744	2.55368e-13
UNSATURATED_FATTY_ACID_BIOSYNTHETIC_PROCESS	14.869	2.65035e-13
REGULATION_OF_PLATELET_ACTIVATION	14.869	2.65035e-13
T_CELL_CYTOKINE_PRODUCTION	19.941	2.69537e-13
SIGNALING_RECEPTOR_LIGAND_PRECURSOR_PROCESSING	19.941	2.69537e-13
POSITIVE_REGULATION_OF_EXOCYTOSIS	9.91309	2.73934e-13
REGULATION_OF_RECEPTOR_INTERNALIZATION	13.1271	2.84792e-13
REGULATION_OF_COLLAGEN_METABOLIC_PROCESS	16.8758	2.96814e-13
REPRODUCTIVE_BEHAVIOR	16.8758	2.96814e-13
POSITIVE_REGULATION_OF_PATTERN_RECOGNITION_RECEPTOR_SIGNALING_PATHWAY	16.8758	2.96814e-13
POSITIVE_REGULATION_OF_CD4_POSITIVE_ALPHA_BETA_T_CELL_ACTIVATION	16.8758	2.96814e-13
ORGANELLE_DISASSEMBLY	7.14033	2.98972e-13
CELLULAR_RESPONSE_TO_VIRUS	7.93144	3.46743e-13
LIPOPROTEIN_METABOLIC_PROCESS	7.07712	3.56675e-13
ARTERY_DEVELOPMENT	8.41027	3.76665e-13
REGULATION_OF_ALCOHOL_BIOSYNTHETIC_PROCESS	14.4556	3.78576e-13
XENOBIOTIC_METABOLIC_PROCESS	7.84701	4.22175e-13
EATING_BEHAVIOR	19.1102	4.25033e-13
REGULATION_OF_GLIAL_CELL_PROLIFERATION	19.1102	4.25033e-13
CAMERA_TYPE_EYE_MORPHOGENESIS	7.38918	4.37058e-13
T_HELPER_1_TYPE_IMMUNE_RESPONSE	16.314	4.41605e-13
REGULATION_OF_MUSCLE_TISSUE_DEVELOPMENT	16.314	4.41605e-13
REGULATION_OF_EXTRINSIC_APOPTOTIC_SIGNALING_PATHWAY_IN_ABSENCE_OF_LIGAND	16.314	4.41605e-13
CELL_DIVISION	3.18263	4.45057e-13
SYNAPTIC_TRANSMISSION_DOPAMINERGIC	28.3356	4.5801e-13
POSITIVE_REGULATION_OF_INTERLEUKIN_17_PRODUCTION	28.3356	4.5801e-13
POSITIVE_REGULATION_OF_VASCULAR_ENDOTHELIAL_CELL_PROLIFERATION	28.3356	4.5801e-13
REGULATION_OF_MITOCHONDRIAL_MEMBRANE_POTENTIAL	11.4164	4.68316e-13
CELLULAR_BIOGENIC_AMINE_METABOLIC_PROCESS	8.88613	4.76044e-13
INFLAMMATORY_RESPONSE_TO_ANTIGENIC_STIMULUS	10.3944	4.82465e-13
NEGATIVE_REGULATION_OF_CANONICAL_WNT_SIGNALING_PATHWAY	6.95431	5.05162e-13
POSITIVE_REGULATION_OF_VASOCONSTRICTION	22.5141	5.09137e-13
VIRAL_GENOME_REPLICATION	7.31881	5.24821e-13
NOREPINEPHRINE_TRANSPORT	36.585	5.25426e-13
REGULATION_OF_NMDA_RECEPTOR_ACTIVITY	36.585	5.25426e-13
REGULATION_OF_STEROID_HORMONE_SECRETION	36.585	5.25426e-13
REGULATION_OF_LYMPHOCYTE_APOPTOTIC_PROCESS	12.531	5.35827e-13
NEGATIVE_REGULATION_OF_NEURON_PROJECTION_DEVELOPMENT	6.8942	5.99747e-13
PIGMENT_METABOLIC_PROCESS	10.2204	6.24029e-13
RESPONSE_TO_BMP	5.99542	6.27569e-13
RESPONSE_TO_ANTIBIOTIC	15.7883	6.49656e-13
AMYLOID_FIBRIL_FORMATION	18.3458	6.59927e-13
DIGESTIVE_SYSTEM_DEVELOPMENT	6.83512	7.10928e-13
STEM_CELL_DEVELOPMENT	9.3372	7.16836e-13
INTRINSIC_APOPTOTIC_SIGNALING_PATHWAY_IN_RESPONSE_TO_ENDOPLASMIC_RETICULUM_STRESS	12.2549	7.27784e-13
NATURAL_KILLER_CELL_ACTIVATION	8.65804	7.38281e-13
NEGATIVE_REGULATION_OF_LEUKOCYTE_MIGRATION	13.6941	7.52806e-13
NEGATIVE_REGULATION_OF_G_PROTEIN_COUPLED_RECEPTOR_SIGNALING_PATHWAY	13.6941	7.52806e-13
PHOSPHOLIPID_BIOSYNTHETIC_PROCESS	4.82609	7.95556e-13
ESTABLISHMENT_OF_ORGANELLE_LOCALIZATION	3.70273	7.96439e-13
LEUKOCYTE_DEGRANULATION	10.0505	8.03825e-13
POSITIVE_REGULATION_OF_RECEPTOR_INTERNALIZATION	26.4628	8.29842e-13
RESPONSE_TO_ISOQUINOLINE_ALKALOID	26.4628	8.29842e-13
NEGATIVE_REGULATION_OF_SPROUTING_ANGIOGENESIS	26.4628	8.29842e-13
REGULATION_OF_SUPEROXIDE_METABOLIC_PROCESS	21.3884	8.40008e-13
REGULATION_OF_CARDIOCYTE_DIFFERENTIATION	21.3884	8.40008e-13
ENSHEATHMENT_OF_NEURONS	6.77704	8.41423e-13
CHEMOKINE_C_X_C_MOTIF_LIGAND_2_PRODUCTION	47.9111	8.91847e-13
NEGATIVE_REGULATION_OF_NEUROINFLAMMATORY_RESPONSE	47.9111	8.91847e-13
POSITIVE_REGULATION_OF_HISTONE_MODIFICATION	8.54834	9.15543e-13
POSITIVE_REGULATION_OF_PROTEIN_DEPHOSPHORYLATION	15.2951	9.45561e-13
SIGNAL_TRANSDUCTION_IN_RESPONSE_TO_DNA_DAMAGE	5.87742	9.69603e-13
PROTEIN_COMPLEX_OLIGOMERIZATION	4.9279	9.88926e-13
PROTEIN_DEPHOSPHORYLATION	4.7835	9.98355e-13
POSITIVE_REGULATION_OF_STEROID_BIOSYNTHETIC_PROCESS	33.2776	1.06651e-12
POSITIVE_REGULATION_OF_TISSUE_REMODELING	33.2776	1.06651e-12
INTESTINAL_LIPID_ABSORPTION	33.2776	1.06651e-12
STEM_CELL_PROLIFERATION	7.44714	1.09472e-12
REGULATION_OF_POTASSIUM_ION_TRANSPORT	7.84925	1.27276e-12
NEGATIVE_REGULATION_OF_CYTOKINE_PRODUCTION_INVOLVED_IN_IMMUNE_RESPONSE	20.3699	1.35873e-12
POSITIVE_REGULATION_OF_CD4_POSITIVE_ALPHA_BETA_T_CELL_DIFFERENTIATION	20.3699	1.35873e-12
POSITIVE_REGULATION_OF_CELL_MIGRATION_INVOLVED_IN_SPROUTING_ANGIOGENESIS	20.3699	1.35873e-12
RELAXATION_OF_MUSCLE	20.3699	1.35873e-12
NEGATIVE_REGULATION_OF_SIGNAL_TRANSDUCTION_IN_ABSENCE_OF_LIGAND	20.3699	1.35873e-12
POLYSACCHARIDE_BIOSYNTHETIC_PROCESS	10.5849	1.39942e-12
RETINA_DEVELOPMENT_IN_CAMERA_TYPE_EYE	6.29386	1.41286e-12
MIRNA_MEDIATED_GENE_SILENCING_BY_INHIBITION_OF_TRANSLATION	8.94768	1.4236e-12
T_CELL_APOPTOTIC_PROCESS	13.0088	1.45006e-12
POSITIVE_REGULATION_OF_VASCULAR_ENDOTHELIAL_GROWTH_FACTOR_PRODUCTION	24.8087	1.45992e-12
POSITIVE_REGULATION_OF_TOLL_LIKE_RECEPTOR_SIGNALING_PATHWAY	24.8087	1.45992e-12
POSITIVE_REGULATION_OF_ACTIVATED_T_CELL_PROLIFERATION	24.8087	1.45992e-12
PROTEIN_LIPID_COMPLEX_ASSEMBLY	24.8087	1.45992e-12
RESPONSE_TO_TESTOSTERONE	16.9814	1.52441e-12
CHROMATIN_ORGANIZATION	3.14739	1.60479e-12
COLLAGEN_BIOSYNTHETIC_PROCESS	14.3957	1.944e-12
POSITIVE_REGULATION_OF_EXTRINSIC_APOPTOTIC_SIGNALING_PATHWAY	14.3957	1.944e-12
CELLULAR_RESPIRATION	4.94268	1.94921e-12
CELL_MATURATION	5.68822	1.96092e-12
REGULATION_OF_TUMOR_NECROSIS_FACTOR_MEDIATED_SIGNALING_PATHWAY	12.6913	1.99027e-12
VASCULAR_ENDOTHELIAL_GROWTH_FACTOR_RECEPTOR_SIGNALING_PATHWAY	12.6913	1.99027e-12
CHRONIC_INFLAMMATORY_RESPONSE	41.9478	2.0566e-12
POSITIVE_REGULATION_OF_TRANSCRIPTION_FROM_RNA_POLYMERASE_II_PROMOTER_IN_RESPONSE_TO_STRESS	41.9478	2.0566e-12
CELL_ADHESION_MOLECULE_PRODUCTION	30.5114	2.07069e-12
POSITIVE_REGULATION_OF_ENDOTHELIAL_CELL_APOPTOTIC_PROCESS	30.5114	2.07069e-12
POSITIVE_REGULATION_OF_BLOOD_PRESSURE	19.4441	2.15783e-12
REGULATION_OF_GLYCOGEN_METABOLIC_PROCESS	19.4441	2.15783e-12
NEGATIVE_REGULATION_OF_NF_KAPPAB_TRANSCRIPTION_FACTOR_ACTIVITY	8.70561	2.21438e-12
NEURAL_PRECURSOR_CELL_PROLIFERATION	6.44823	2.24207e-12
TOR_SIGNALING	7.15794	2.26459e-12
NEPHRON_EPITHELIUM_DEVELOPMENT	7.59596	2.26851e-12
NEGATIVE_REGULATION_OF_CELLULAR_RESPONSE_TO_INSULIN_STIMULUS	16.3756	2.2718e-12
PATTERN_SPECIFICATION_PROCESS	3.52204	2.32573e-12
NEGATIVE_REGULATION_OF_WNT_SIGNALING_PATHWAY	5.8642	2.46207e-12
REGULATION_OF_GLUCAN_BIOSYNTHETIC_PROCESS	23.3492	2.50068e-12
GLYCEROPHOSPHOLIPID_BIOSYNTHETIC_PROCESS	5.22139	2.52351e-12
REGULATION_OF_CELLULAR_RESPONSE_TO_TRANSFORMING_GROWTH_FACTOR_BETA_STIMULUS	6.39649	2.6268e-12
DNA_MODIFICATION	7.08911	2.70335e-12
CEREBRAL_CORTEX_DEVELOPMENT	7.51168	2.73873e-12
REGIONALIZATION	3.97841	2.73879e-12
PROSTATE_GLAND_DEVELOPMENT	13.984	2.74863e-12
T_CELL_SELECTION	13.984	2.74863e-12
BROWN_FAT_CELL_DIFFERENTIATION	13.984	2.74863e-12
RESPONSE_TO_AMINO_ACID_STARVATION	13.984	2.74863e-12
POSITIVE_REGULATION_OF_CALCIUM_ION_IMPORT	60.8566	2.81416e-12
NEGATIVE_REGULATION_OF_INNATE_IMMUNE_RESPONSE	10.0349	3.02904e-12
ANTIGEN_PROCESSING_AND_PRESENTATION	7.94457	3.15105e-12
POSITIVE_REGULATION_OF_MITOTIC_CELL_CYCLE	7.02159	3.22135e-12
RESPONSE_TO_AMINE	15.8114	3.3449e-12
TOLL_LIKE_RECEPTOR_4_SIGNALING_PATHWAY	15.8114	3.3449e-12
RESPONSE_TO_MINERALOCORTICOID	18.5988	3.36895e-12
VASCULAR_TRANSPORT	9.1518	3.3896e-12
RHO_PROTEIN_SIGNAL_TRANSDUCTION	6.62418	3.50726e-12
CELLULAR_HORMONE_METABOLIC_PROCESS	6.62418	3.50726e-12
NEGATIVE_REGULATION_OF_CELL_CYCLE_PROCESS	4.21049	3.60989e-12
LYSOSOMAL_TRANSPORT	6.95564	3.83189e-12
RESPONSE_TO_CATECHOLAMINE	7.85216	3.83839e-12
RESPONSE_TO_ZINC_ION	13.5953	3.85246e-12
POSITIVE_REGULATION_OF_NATURAL_KILLER_CELL_ACTIVATION	28.1456	3.86574e-12
NEGATIVE_REGULATION_OF_MUSCLE_CONTRACTION	28.1456	3.86574e-12
NEGATIVE_REGULATION_OF_ERK1_AND_ERK2_CASCADE	9.86752	3.88488e-12
LYMPHOCYTE_HOMEOSTASIS	10.8111	4.0398e-12
RESPONSE_TO_ESTROGEN	10.8111	4.0398e-12
ANIMAL_ORGAN_FORMATION	10.8111	4.0398e-12
POSITIVE_REGULATION_OF_SMOOTH_MUSCLE_CONTRACTION	22.052	4.18029e-12
ANGIOGENESIS_INVOLVED_IN_WOUND_HEALING	22.052	4.18029e-12
ENERGY_RESERVE_METABOLIC_PROCESS	9.01707	4.25529e-12
ALPHA_AMINO_ACID_METABOLIC_PROCESS	5.28118	4.34679e-12
PROSTAGLANDIN_TRANSPORT	37.2441	4.43747e-12
REGULATION_OF_AMYLOID_BETA_CLEARANCE	37.2441	4.43747e-12
REGULATION_OF_GLIAL_CELL_MIGRATION	37.2441	4.43747e-12
FAT_SOLUBLE_VITAMIN_METABOLIC_PROCESS	15.2846	4.86895e-12
REGULATION_OF_DNA_TEMPLATED_TRANSCRIPTION_IN_RESPONSE_TO_STRESS	15.2846	4.86895e-12
RESPONSE_TO_INTERLEUKIN_6	15.2846	4.86895e-12
REGULATION_OF_MITOCHONDRIAL_MEMBRANE_PERMEABILITY	11.8228	4.94005e-12
CELLULAR_CARBOHYDRATE_BIOSYNTHETIC_PROCESS	9.70286	4.96231e-12
NEGATIVE_REGULATION_OF_CELL_PROJECTION_ORGANIZATION	5.44488	5.04435e-12
RENAL_TUBULE_DEVELOPMENT	8.25885	5.17417e-12
MATING_BEHAVIOR	17.824	5.17695e-12
NEGATIVE_REGULATION_OF_MUSCLE_HYPERTROPHY	17.824	5.17695e-12
REGULATION_OF_PROTEIN_ACETYLATION	8.88625	5.32449e-12
CELLULAR_RESPONSE_TO_GLUCOSE_STARVATION	13.2276	5.35467e-12
NEUROPEPTIDE_SIGNALING_PATHWAY	7.67365	5.65593e-12
CELLULAR_MODIFIED_AMINO_ACID_METABOLIC_PROCESS	5.63215	5.70316e-12
MUSCLE_ORGAN_MORPHOGENESIS	9.5436	6.31358e-12
CARDIAC_MUSCLE_CELL_PROLIFERATION	11.5609	6.60386e-12
REGULATION_OF_NUCLEAR_DIVISION	6.40279	6.67463e-12
NEGATIVE_REGULATION_OF_OSTEOCLAST_DIFFERENTIATION	20.8914	6.83383e-12
PROSTANOID_BIOSYNTHETIC_PROCESS	20.8914	6.83383e-12
REGULATION_OF_ASTROCYTE_DIFFERENTIATION	20.8914	6.83383e-12
NEGATIVE_REGULATION_OF_CELL_JUNCTION_ASSEMBLY	20.8914	6.83383e-12
POSITIVE_REGULATION_OF_SMALL_GTPASE_MEDIATED_SIGNAL_TRANSDUCTION	10.4002	6.85729e-12
REGULATION_OF_NATURAL_KILLER_CELL_PROLIFERATION	91.5954	6.884e-12
CELL_CELL_ADHESION_INVOLVED_IN_GASTRULATION	91.5954	6.884e-12
POSITIVE_REGULATION_OF_GLIAL_CELL_MIGRATION	91.5954	6.884e-12
STEROID_CATABOLIC_PROCESS	26.1536	6.96952e-12
POSITIVE_REGULATION_OF_OSTEOCLAST_DIFFERENTIATION	26.1536	6.96952e-12
SENSORY_PERCEPTION_OF_TEMPERATURE_STIMULUS	26.1536	6.96952e-12
NEGATIVE_REGULATION_OF_VASCULAR_ASSOCIATED_SMOOTH_MUSCLE_CELL_MIGRATION	26.1536	6.96952e-12
REGULATION_OF_METALLOPEPTIDASE_ACTIVITY	26.1536	6.96952e-12
EMBRYONIC_ORGAN_MORPHOGENESIS	4.30931	7.13375e-12
DENDRITE_DEVELOPMENT	4.81298	7.70356e-12
REGULATION_OF_SYSTEMIC_ARTERIAL_BLOOD_PRESSURE_BY_HORMONE	17.1055	7.83802e-12
RESPIRATORY_BURST	17.1055	7.83802e-12
MYOBLAST_DIFFERENTIATION	7.49965	8.25948e-12
POSITIVE_REGULATION_OF_FAT_CELL_DIFFERENTIATION	10.2067	8.87054e-12
POSITIVE_REGULATION_OF_GLIAL_CELL_PROLIFERATION	33.5317	9.04807e-12
REGULATION_OF_CELL_CELL_ADHESION_MEDIATED_BY_CADHERIN	33.5317	9.04807e-12
REGULATION_OF_CARDIAC_MUSCLE_CELL_DIFFERENTIATION	33.5317	9.04807e-12
WOUND_HEALING_INVOLVED_IN_INFLAMMATORY_RESPONSE	243.423	9.38722e-12
REGULATION_OF_ACTIVATION_OF_JANUS_KINASE_ACTIVITY	243.423	9.38722e-12
REGULATION_OF_RESPONSE_TO_DNA_DAMAGE_STIMULUS	4.15664	9.53588e-12
NEGATIVE_REGULATION_OF_PRODUCTION_OF_MOLECULAR_MEDIATOR_OF_IMMUNE_RESPONSE	14.3296	9.99319e-12
ER_NUCLEUS_SIGNALING_PATHWAY	14.3296	9.99319e-12
ALPHA_BETA_T_CELL_PROLIFERATION	14.3296	9.99319e-12
HYDROGEN_PEROXIDE_METABOLIC_PROCESS	12.5496	1.01039e-11
SODIUM_ION_HOMEOSTASIS	12.5496	1.01039e-11
REGULATION_OF_CELLULAR_SENESCENCE	12.5496	1.01039e-11
REGULATION_OF_BONE_MINERALIZATION	9.24028	1.01043e-11
AUTOPHAGY_OF_MITOCHONDRION	8.51569	1.0235e-11
MAINTENANCE_OF_PROTEIN_LOCATION	8.51569	1.0235e-11
REGULATION_OF_STEM_CELL_PROLIFERATION	8.51569	1.0235e-11
NEURON_DEATH_IN_RESPONSE_TO_OXIDATIVE_STRESS	19.847	1.09449e-11
REGULATION_OF_CHOLESTEROL_METABOLIC_PROCESS	16.4482	1.17031e-11
POSITIVE_REGULATION_OF_LIPID_STORAGE	24.4098	1.21787e-11
NEGATIVE_REGULATION_OF_AMINE_TRANSPORT	24.4098	1.21787e-11
POSITIVE_REGULATION_OF_RELEASE_OF_CYTOCHROME_C_FROM_MITOCHONDRIA	24.4098	1.21787e-11
NEGATIVE_REGULATION_OF_MYELOID_CELL_DIFFERENTIATION	8.39897	1.26491e-11
MYELOID_CELL_DEVELOPMENT	9.09575	1.27128e-11
ANTIMICROBIAL_HUMORAL_RESPONSE	6.85542	1.36555e-11
RESPONSE_TO_COCAINE	13.8951	1.41057e-11
REGULATION_OF_MITOCHONDRIAL_MEMBRANE_PERMEABILITY_INVOLVED_IN_APOPTOTIC_PROCESS	13.8951	1.41057e-11
REGULATION_OF_NEUTROPHIL_MIGRATION	13.8951	1.41057e-11
REGULATION_OF_T_CELL_MIGRATION	13.8951	1.41057e-11
SKIN_DEVELOPMENT	4.19479	1.41665e-11
ERYTHROCYTE_HOMEOSTASIS	6.46634	1.44695e-11
T_CELL_RECEPTOR_SIGNALING_PATHWAY	6.46634	1.44695e-11
MACROMOLECULE_DEACYLATION	6.46634	1.44695e-11
POSITIVE_REGULATION_OF_OSTEOBLAST_DIFFERENTIATION	9.84246	1.46445e-11
TETRAPYRROLE_METABOLIC_PROCESS	10.8409	1.52337e-11
CELLULAR_PROCESS_INVOLVED_IN_REPRODUCTION_IN_MULTICELLULAR_ORGANISM	3.53984	1.53849e-11
FORMATION_OF_PRIMARY_GERM_LAYER	6.78935	1.61747e-11
ANTIGEN_RECEPTOR_MEDIATED_SIGNALING_PATHWAY	4.65275	1.68455e-11
TYPE_I_INTERFERON_PRODUCTION	7.66875	1.70682e-11
REGULATION_OF_SIGNAL_TRANSDUCTION_BY_P53_CLASS_MEDIATOR	7.66875	1.70682e-11
RESPONSE_TO_HYDROPEROXIDE	43.4807	1.71891e-11
REGULATION_OF_LIPOPROTEIN_PARTICLE_CLEARANCE	18.902	1.72003e-11
DENDRITIC_CELL_MIGRATION	18.902	1.72003e-11
POSITIVE_REGULATION_OF_CALCIUM_MEDIATED_SIGNALING	15.8396	1.72478e-11
NEURON_CELLULAR_HOMEOSTASIS	15.8396	1.72478e-11
REGULATION_OF_SUPEROXIDE_ANION_GENERATION	30.4897	1.75707e-11
POSITIVE_REGULATION_OF_NITRIC_OXIDE_SYNTHASE_ACTIVITY	30.4897	1.75707e-11
CELLULAR_NITROGEN_COMPOUND_CATABOLIC_PROCESS	3.35005	1.83804e-11
PATHWAY_RESTRICTED_SMAD_PROTEIN_PHOSPHORYLATION	10.6161	1.99088e-11
POSITIVE_REGULATION_OF_NEUROBLAST_PROLIFERATION	22.8842	2.06904e-11
POSITIVE_REGULATION_OF_ACUTE_INFLAMMATORY_RESPONSE	22.8842	2.06904e-11
REGULATION_OF_TOLL_LIKE_RECEPTOR_4_SIGNALING_PATHWAY	22.8842	2.06904e-11
CELL_CELL_ADHESION_MEDIATED_BY_CADHERIN	22.8842	2.06904e-11
NEGATIVE_REGULATION_OF_MACROPHAGE_DERIVED_FOAM_CELL_DIFFERENTIATION	68.6419	2.17336e-11
POSITIVE_REGULATION_OF_CATECHOLAMINE_SECRETION	68.6419	2.17336e-11
PHOSPHOLIPID_EFFLUX	68.6419	2.17336e-11
REGULATION_OF_ANIMAL_ORGAN_MORPHOGENESIS	6.66094	2.25764e-11
CELLULAR_GLUCAN_METABOLIC_PROCESS	9.50268	2.37669e-11
IMMUNOGLOBULIN_PRODUCTION	4.88841	2.38458e-11
POSTSYNAPSE_ORGANIZATION	5.70865	2.42309e-11
ARACHIDONIC_ACID_METABOLIC_PROCESS	11.65	2.48122e-11
CELLULAR_RESPONSE_TO_NUTRIENT	15.2742	2.51095e-11
REGULATION_OF_NATURAL_KILLER_CELL_ACTIVATION	15.2742	2.51095e-11
G_PROTEIN_COUPLED_RECEPTOR_SIGNALING_PATHWAY_COUPLED_TO_CYCLIC_NUCLEOTIDE_SECOND_MESSENGER	10.4049	2.58848e-11
ANOIKIS	18.043	2.65612e-11
REGULATION_OF_PROGRAMMED_NECROTIC_CELL_DEATH	18.043	2.65612e-11
POSITIVE_REGULATION_OF_T_CELL_MIGRATION	18.043	2.65612e-11
POSITIVE_REGULATION_OF_LYASE_ACTIVITY	13.1005	2.73495e-11
REGULATION_OF_ACTIN_FILAMENT_BUNDLE_ASSEMBLY	7.40095	3.00085e-11
TUBE_FORMATION	5.90965	3.02684e-11
FIBROBLAST_GROWTH_FACTOR_RECEPTOR_SIGNALING_PATHWAY	8.56027	3.07796e-11
REGULATION_OF_PHOSPHOPROTEIN_PHOSPHATASE_ACTIVITY	11.3797	3.30352e-11
NEGATIVE_REGULATION_OF_LEUKOCYTE_MEDIATED_IMMUNITY	10.1999	3.34871e-11
REGULATION_OF_LIPID_KINASE_ACTIVITY	10.1999	3.34871e-11
POSITIVE_REGULATION_OF_ACTIVATION_OF_JANUS_KINASE_ACTIVITY	Inf	3.37267e-11
SLEEP	21.5381	3.42648e-11
RENAL_TUBULAR_SECRETION	21.5381	3.42648e-11
ORGANIC_ACID_TRANSMEMBRANE_TRANSPORT	5.86464	3.49603e-11
METENCEPHALON_DEVELOPMENT	7.31687	3.60564e-11
LACTATION	14.7482	3.61346e-11
REGULATION_OF_NUCLEOTIDE_BIOSYNTHETIC_PROCESS	14.7482	3.61346e-11
POSITIVE_REGULATION_OF_GLIAL_CELL_DIFFERENTIATION	14.7482	3.61346e-11
RESPONSE_TO_ELECTRICAL_STIMULUS	14.7482	3.61346e-11
REGULATION_OF_PHOSPHOLIPASE_C_ACTIVITY	14.7482	3.61346e-11
EOSINOPHIL_CHEMOTAXIS	38.0716	3.75608e-11
POSITIVE_REGULATION_OF_NEUROINFLAMMATORY_RESPONSE	38.0716	3.75608e-11
DOPAMINE_TRANSPORT	12.7363	3.75998e-11
MYELOID_LEUKOCYTE_CYTOKINE_PRODUCTION	12.7363	3.75998e-11
POSITIVE_REGULATION_OF_REGULATED_SECRETORY_PATHWAY	12.7363	3.75998e-11
PROTEIN_POLYMERIZATION	4.24598	3.76949e-11
NATURAL_KILLER_CELL_MEDIATED_IMMUNITY	9.18559	3.79564e-11
REGULATION_OF_GTPASE_ACTIVITY	3.69137	3.87927e-11
POSITIVE_REGULATION_OF_PHOSPHATASE_ACTIVITY	17.2531	4.03544e-11
CELLULAR_RESPONSE_TO_ALKALOID	17.2531	4.03544e-11
NEUROTRANSMITTER_REUPTAKE	17.2531	4.03544e-11
ISOPRENOID_METABOLIC_PROCESS	6.81794	4.098e-11
PROTEIN_FOLDING	4.7612	4.22763e-11
LONG_CHAIN_FATTY_ACID_METABOLIC_PROCESS	7.23469	4.32296e-11
REGULATION_OF_ACTION_POTENTIAL	11.1213	4.37126e-11
ESTABLISHMENT_OF_PROTEIN_LOCALIZATION_TO_MEMBRANE	4.32956	4.54985e-11
POSITIVE_REGULATION_OF_NATURAL_KILLER_CELL_PROLIFERATION	121.662	4.56097e-11
POSITIVE_REGULATION_OF_MYELOID_CELL_APOPTOTIC_PROCESS	121.662	4.56097e-11
RESPONSE_TO_LIPOTEICHOIC_ACID	121.662	4.56097e-11
REGULATION_OF_COA_TRANSFERASE_ACTIVITY	121.662	4.56097e-11
ARTERY_MORPHOGENESIS	9.03486	4.76924e-11
MALE_SEX_DIFFERENTIATION	5.5115	4.79462e-11
NEGATIVE_REGULATION_OF_MYELOID_LEUKOCYTE_DIFFERENTIATION	12.3944	5.12812e-11
POSITIVE_REGULATION_OF_MEMBRANE_PERMEABILITY	12.3944	5.12812e-11
NEGATIVE_REGULATION_OF_GLIOGENESIS	14.2562	5.14365e-11
FEMALE_GAMETE_GENERATION	5.7314	5.34807e-11
SODIUM_ION_TRANSPORT	4.42227	5.42346e-11
GLOMERULUS_DEVELOPMENT	9.81533	5.52509e-11
NEGATIVE_REGULATION_OF_T_CELL_PROLIFERATION	9.81533	5.52509e-11
REGULATION_OF_T_HELPER_1_TYPE_IMMUNE_RESPONSE	20.3417	5.54409e-11
T_HELPER_17_CELL_DIFFERENTIATION	20.3417	5.54409e-11
REGULATION_OF_JUN_KINASE_ACTIVITY	10.8755	5.74984e-11
RESPONSE_TO_CAMP	8.19841	5.77687e-11
DETECTION_OF_TEMPERATURE_STIMULUS	25.8001	5.86163e-11
CIRCADIAN_SLEEP_WAKE_CYCLE	25.8001	5.86163e-11
CD4_POSITIVE_OR_CD8_POSITIVE_ALPHA_BETA_T_CELL_LINEAGE_COMMITMENT	25.8001	5.86163e-11
REGULATION_OF_MEMBRANE_PROTEIN_ECTODOMAIN_PROTEOLYSIS	25.8001	5.86163e-11
POSITIVE_REGULATION_OF_TRIGLYCERIDE_METABOLIC_PROCESS	25.8001	5.86163e-11
POSITIVE_REGULATION_OF_MUSCLE_TISSUE_DEVELOPMENT	25.8001	5.86163e-11
REGULATION_OF_ENDOTHELIAL_CELL_CHEMOTAXIS	25.8001	5.86163e-11
REGULATION_OF_TRIGLYCERIDE_CATABOLIC_PROCESS	54.7841	5.91155e-11
POSITIVE_REGULATION_OF_MHC_CLASS_II_BIOSYNTHETIC_PROCESS	54.7841	5.91155e-11
MACROPHAGE_APOPTOTIC_PROCESS	54.7841	5.91155e-11
COMPLEMENT_DEPENDENT_CYTOTOXICITY	54.7841	5.91155e-11
REGULATION_OF_TAU_PROTEIN_KINASE_ACTIVITY	54.7841	5.91155e-11
NEGATIVE_REGULATION_OF_METALLOPEPTIDASE_ACTIVITY	54.7841	5.91155e-11
ENTEROENDOCRINE_CELL_DIFFERENTIATION	16.5346	6.03881e-11
SYNAPTIC_VESICLE_EXOCYTOSIS	7.07573	6.17493e-11
CELL_SUBSTRATE_JUNCTION_ORGANIZATION	7.56925	6.23394e-11
PEPTIDYL_LYSINE_ACETYLATION	5.00847	6.49696e-11
PORPHYRIN_CONTAINING_COMPOUND_METABOLIC_PROCESS	12.0616	6.94101e-11
ESTABLISHMENT_OF_ENDOTHELIAL_BARRIER	12.0616	6.94101e-11
GLUCAN_BIOSYNTHETIC_PROCESS	13.796	7.2467e-11
REGULATION_OF_PEPTIDYL_THREONINE_PHOSPHORYLATION	13.796	7.2467e-11
OUTFLOW_TRACT_MORPHOGENESIS	8.74782	7.4478e-11
REGULATION_OF_NEUROTRANSMITTER_RECEPTOR_ACTIVITY	10.636	7.52008e-11
POSITIVE_REGULATION_OF_MACROPHAGE_DERIVED_FOAM_CELL_DIFFERENTIATION	33.8469	7.70098e-11
INTESTINAL_CHOLESTEROL_ABSORPTION	33.8469	7.70098e-11
CORTICOSTEROID_HORMONE_SECRETION	33.8469	7.70098e-11
DETECTION_OF_TEMPERATURE_STIMULUS_INVOLVED_IN_SENSORY_PERCEPTION	33.8469	7.70098e-11
REGULATION_OF_SODIUM_ION_TRANSPORT	7.97375	8.66067e-11
POSITIVE_REGULATION_OF_PROTEIN_POLYMERIZATION	7.97375	8.66067e-11
TYPE_B_PANCREATIC_CELL_DIFFERENTIATION	19.2712	8.78161e-11
ENDOTHELIAL_CELL_CHEMOTAXIS	19.2712	8.78161e-11
REGULATION_OF_T_HELPER_17_TYPE_IMMUNE_RESPONSE	19.2712	8.78161e-11
RESPONSE_TO_FOOD	15.874	8.9098e-11
TYPE_2_IMMUNE_RESPONSE	15.874	8.9098e-11
POSITIVE_T_CELL_SELECTION	15.874	8.9098e-11
VESICLE_ORGANIZATION	3.72647	9.07752e-11
VACUOLAR_TRANSPORT	5.56509	9.27497e-11
EPIGENETIC_REGULATION_OF_GENE_EXPRESSION	5.56509	9.27497e-11
POSITIVE_REGULATION_OF_OSSIFICATION	11.7538	9.32664e-11
POTASSIUM_ION_TRANSPORT	4.44103	9.6962e-11
IMMUNE_RESPONSE_TO_TUMOR_CELL	23.9572	1.01635e-10
RENAL_SYSTEM_PROCESS_INVOLVED_IN_REGULATION_OF_SYSTEMIC_ARTERIAL_BLOOD_PRESSURE	23.9572	1.01635e-10
TYPE_B_PANCREATIC_CELL_DEVELOPMENT	23.9572	1.01635e-10
POSITIVE_REGULATION_OF_NUCLEOTIDE_BIOSYNTHETIC_PROCESS	23.9572	1.01635e-10
NEGATIVE_REGULATION_OF_INTERLEUKIN_10_PRODUCTION	23.9572	1.01635e-10
DETECTION_OF_STIMULUS_INVOLVED_IN_SENSORY_PERCEPTION_OF_PAIN	23.9572	1.01635e-10
POSITIVE_REGULATION_OF_AMYLOID_PRECURSOR_PROTEIN_CATABOLIC_PROCESS	23.9572	1.01635e-10
POSITIVE_REGULATION_OF_LEUKOCYTE_ADHESION_TO_VASCULAR_ENDOTHELIAL_CELL	23.9572	1.01635e-10
REGULATION_OF_VASCULAR_ASSOCIATED_SMOOTH_MUSCLE_CELL_DIFFERENTIATION	23.9572	1.01635e-10
NEGATIVE_REGULATION_OF_VASCULAR_ENDOTHELIAL_CELL_PROLIFERATION	23.9572	1.01635e-10
POSITIVE_REGULATION_OF_FATTY_ACID_TRANSPORT	23.9572	1.01635e-10
DICARBOXYLIC_ACID_TRANSPORT	7.86598	1.05596e-10
MICROTUBULE_BASED_PROCESS	2.49418	1.08757e-10
PHOSPHOLIPID_TRANSPORT	7.29568	1.08773e-10
DEFENSE_RESPONSE_TO_FUNGUS	11.4608	1.24452e-10
NEGATIVE_REGULATION_OF_LEUKOCYTE_APOPTOTIC_PROCESS	11.4608	1.24452e-10
POSITIVE_REGULATION_OF_NEURAL_PRECURSOR_CELL_PROLIFERATION	11.4608	1.24452e-10
MAINTENANCE_OF_PROTEIN_LOCATION_IN_CELL	10.193	1.26553e-10
ANTIGEN_PROCESSING_AND_PRESENTATION_OF_PEPTIDE_ANTIGEN	10.193	1.26553e-10
POSITIVE_REGULATION_OF_PROTEASOMAL_UBIQUITIN_DEPENDENT_PROTEIN_CATABOLIC_PROCESS	7.7611	1.28398e-10
PROTEIN_LOCALIZATION_TO_MITOCHONDRION	6.36668	1.28447e-10
RESPONSE_TO_PROGESTERONE	15.2638	1.29728e-10
ACTIN_FILAMENT_BUNDLE_ORGANIZATION	5.44642	1.38547e-10
NATURAL_KILLER_CELL_PROLIFERATION	45.6543	1.43568e-10
RESPIRATORY_BURST_INVOLVED_IN_DEFENSE_RESPONSE	45.6543	1.43568e-10
HIGH_DENSITY_LIPOPROTEIN_PARTICLE_ASSEMBLY	45.6543	1.43568e-10
PURINE_CONTAINING_COMPOUND_BIOSYNTHETIC_PROCESS	4.36008	1.46148e-10
REGULATION_OF_PROTEASOMAL_UBIQUITIN_DEPENDENT_PROTEIN_CATABOLIC_PROCESS	5.9822	1.4622e-10
REGULATION_OF_CIRCADIAN_SLEEP_WAKE_CYCLE	30.468	1.49582e-10
REGULATION_OF_LIPOPROTEIN_LIPASE_ACTIVITY	30.468	1.49582e-10
RESPONSE_TO_HYPEROXIA	30.468	1.49582e-10
FEVER_GENERATION	81.1267	1.62511e-10
SYNAPSE_PRUNING	81.1267	1.62511e-10
REGULATION_OF_MACROPHAGE_APOPTOTIC_PROCESS	81.1267	1.62511e-10
POSITIVE_REGULATION_OF_RESPONSE_TO_CYTOKINE_STIMULUS	9.98764	1.62903e-10
POSITIVE_REGULATION_OF_EPITHELIAL_TO_MESENCHYMAL_TRANSITION	11.1816	1.64962e-10
XENOBIOTIC_CATABOLIC_PROCESS	22.3601	1.71056e-10
NEGATIVE_REGULATION_OF_RECEPTOR_SIGNALING_PATHWAY_VIA_JAK_STAT	22.3601	1.71056e-10
REGULATION_OF_MITOTIC_NUCLEAR_DIVISION	6.63768	1.71583e-10
CYCLIC_NUCLEOTIDE_MEDIATED_SIGNALING	8.22532	1.74338e-10
PROTEIN_MODIFICATION_BY_SMALL_PROTEIN_CONJUGATION	2.51662	1.84967e-10
POSITIVE_REGULATION_OF_PROTEIN_IMPORT_INTO_NUCLEUS	14.6991	1.86555e-10
NEGATIVE_REGULATION_OF_CYTOKINE_PRODUCTION_INVOLVED_IN_INFLAMMATORY_RESPONSE	14.6991	1.86555e-10
REGULATION_OF_NEUROBLAST_PROLIFERATION	14.6991	1.86555e-10
NEGATIVE_REGULATION_OF_T_CELL_DIFFERENTIATION	12.5786	1.91496e-10
PHENOL_CONTAINING_COMPOUND_BIOSYNTHETIC_PROCESS	12.5786	1.91496e-10
NEGATIVE_REGULATION_OF_RECEPTOR_SIGNALING_PATHWAY_VIA_STAT	17.4307	2.08097e-10
GLUTATHIONE_METABOLIC_PROCESS	10.9159	2.17264e-10
ORGANIC_CATION_TRANSPORT	10.9159	2.17264e-10
REGULATION_OF_EXTRACELLULAR_MATRIX_ORGANIZATION	10.9159	2.17264e-10
POSITIVE_REGULATION_OF_WNT_SIGNALING_PATHWAY	5.83223	2.25831e-10
NEURAL_CREST_CELL_DIFFERENTIATION	7.45923	2.2723e-10
SYNAPSE_ASSEMBLY	5.05719	2.51264e-10
REGULATION_OF_CELLULAR_RESPIRATION	12.2223	2.60203e-10
DENDRITIC_CELL_DIFFERENTIATION	12.2223	2.60203e-10
RIBOSE_PHOSPHATE_BIOSYNTHETIC_PROCESS	4.3761	2.61759e-10
POSITIVE_REGULATION_OF_COA_TRANSFERASE_ACTIVITY	212.882	2.623e-10
MAINTENANCE_OF_PROTEIN_LOCALIZATION_IN_ORGANELLE	14.1737	2.65161e-10
NEUROBLAST_PROLIFERATION	9.5937	2.66002e-10
NEGATIVE_REGULATION_OF_SYSTEMIC_ARTERIAL_BLOOD_PRESSURE	27.7202	2.7734e-10
NEGATIVE_REGULATION_OF_GLUCOSE_TRANSMEMBRANE_TRANSPORT	27.7202	2.7734e-10
RESPONSE_TO_IMMOBILIZATION_STRESS	27.7202	2.7734e-10
CELLULAR_RESPONSE_TO_FLUID_SHEAR_STRESS	27.7202	2.7734e-10
DENDRITIC_CELL_CHEMOTAXIS	20.9627	2.80284e-10
GLUTAMINE_FAMILY_AMINO_ACID_CATABOLIC_PROCESS	20.9627	2.80284e-10
VASCULAR_ASSOCIATED_SMOOTH_MUSCLE_CONTRACTION	20.9627	2.80284e-10
PROTEIN_REFOLDING	20.9627	2.80284e-10
REGULATION_OF_LYMPHOCYTE_CHEMOTAXIS	20.9627	2.80284e-10
NEGATIVE_REGULATION_OF_ENDOCYTOSIS	10.6596	2.84399e-10
PIGMENT_BIOSYNTHETIC_PROCESS	10.6596	2.84399e-10
NEURON_PROJECTION_EXTENSION	5.22335	3.00534e-10
PURINERGIC_NUCLEOTIDE_RECEPTOR_SIGNALING_PATHWAY	16.6386	3.12223e-10
CELL_DEATH_IN_RESPONSE_TO_HYDROGEN_PEROXIDE	16.6386	3.12223e-10
REGULATION_OF_NEURON_PROJECTION_REGENERATION	16.6386	3.12223e-10
REGULATION_OF_NEUTROPHIL_CHEMOTAXIS	16.6386	3.12223e-10
GLIAL_CELL_APOPTOTIC_PROCESS	39.1391	3.18784e-10
REGULATION_OF_CORTICOSTEROID_HORMONE_SECRETION	39.1391	3.18784e-10
CELL_ADHESION_MEDIATED_BY_INTEGRIN	7.87278	3.19199e-10
CELLULAR_RESPONSE_TO_ACID_CHEMICAL	7.87278	3.19199e-10
REGULATION_OF_PROTEIN_POLYMERIZATION	4.79816	3.265e-10
POSITIVE_REGULATION_OF_AXONOGENESIS	8.52706	3.4561e-10
REGULATION_OF_CARDIAC_MUSCLE_CELL_PROLIFERATION	11.876	3.50757e-10
REGULATION_OF_BMP_SIGNALING_PATHWAY	6.73441	3.69099e-10
PROTEIN_EXPORT_FROM_NUCLEUS	10.4189	3.70091e-10
TRANSFORMING_GROWTH_FACTOR_BETA_PRODUCTION	13.6847	3.72771e-10
REGULATION_OF_RESPONSE_TO_REACTIVE_OXYGEN_SPECIES	13.6847	3.72771e-10
PROTEIN_TARGETING	3.76121	3.81604e-10
OLIGODENDROCYTE_DIFFERENTIATION	7.18311	3.93256e-10
POSITIVE_REGULATION_OF_EPITHELIAL_CELL_DIFFERENTIATION	9.23135	4.26431e-10
DNA_METHYLATION	8.38948	4.27297e-10
ADENYLATE_CYCLASE_INHIBITING_G_PROTEIN_COUPLED_RECEPTOR_SIGNALING_PATHWAY	8.38948	4.27297e-10
CELLULAR_AMINO_ACID_CATABOLIC_PROCESS	6.66106	4.35915e-10
POSITIVE_REGULATION_OF_COLLAGEN_METABOLIC_PROCESS	19.7298	4.48256e-10
T_CELL_CHEMOTAXIS	19.7298	4.48256e-10
NEGATIVE_REGULATION_OF_NECROTIC_CELL_DEATH	19.7298	4.48256e-10
POSITIVE_REGULATION_OF_SPROUTING_ANGIOGENESIS	19.7298	4.48256e-10
NEGATIVE_REGULATION_OF_DNA_METABOLIC_PROCESS	5.60079	4.54101e-10
REGULATION_OF_VIRAL_PROCESS	5.33875	4.54715e-10
MAINTENANCE_OF_BLOOD_BRAIN_BARRIER	15.9161	4.61264e-10
NEGATIVE_REGULATION_OF_OXIDOREDUCTASE_ACTIVITY	15.9161	4.61264e-10
POSITIVE_REGULATION_OF_MYELOID_LEUKOCYTE_CYTOKINE_PRODUCTION_INVOLVED_IN_IMMUNE_RESPONSE	15.9161	4.61264e-10
T_CELL_MEDIATED_CYTOTOXICITY	11.5561	4.69249e-10
NEGATIVE_REGULATION_OF_I_KAPPAB_KINASE_NF_KAPPAB_SIGNALING	11.5561	4.69249e-10
REGULATION_OF_MORPHOGENESIS_OF_A_BRANCHING_STRUCTURE	11.5561	4.69249e-10
NEGATIVE_REGULATION_OF_ACUTE_INFLAMMATORY_RESPONSE	60.7685	4.73766e-10
HORMONE_CATABOLIC_PROCESS	60.7685	4.73766e-10
THROMBIN_ACTIVATED_RECEPTOR_SIGNALING_PATHWAY	60.7685	4.73766e-10
REGULATION_OF_LOW_DENSITY_LIPOPROTEIN_PARTICLE_CLEARANCE	25.3914	4.93815e-10
OVULATION	25.3914	4.93815e-10
REGULATION_OF_NUCLEASE_ACTIVITY	25.3914	4.93815e-10
REGULATION_OF_ICOSANOID_SECRETION	25.3914	4.93815e-10
REGULATION_OF_EXCRETION	25.3914	4.93815e-10
RESPONSE_TO_LEPTIN	25.3914	4.93815e-10
VASCULAR_WOUND_HEALING	25.3914	4.93815e-10
EOSINOPHIL_MIGRATION	25.3914	4.93815e-10
ACTOMYOSIN_STRUCTURE_ORGANIZATION	4.68851	5.12105e-10
ENERGY_HOMEOSTASIS	13.2283	5.18647e-10
ADULT_LOCOMOTORY_BEHAVIOR	8.25628	5.26488e-10
POSITIVE_REGULATION_OF_CATION_CHANNEL_ACTIVITY	8.25628	5.26488e-10
MIDBRAIN_DEVELOPMENT	7.54929	5.69453e-10
NEURON_PROJECTION_ORGANIZATION	7.54929	5.69453e-10
CHONDROCYTE_DIFFERENTIATION	6.51904	6.0455e-10
REGULATION_OF_MYELOID_LEUKOCYTE_MEDIATED_IMMUNITY	9.96699	6.16291e-10
RECEPTOR_METABOLIC_PROCESS	9.96699	6.16291e-10
VASCULOGENESIS	8.12727	6.46553e-10
PROTEIN_NITROSYLATION	34.2463	6.58078e-10
HEAT_GENERATION	34.2463	6.58078e-10
PHENOTYPIC_SWITCHING	34.2463	6.58078e-10
ADHESION_OF_SYMBIONT_TO_HOST	34.2463	6.58078e-10
REPLICATIVE_SENESCENCE	34.2463	6.58078e-10
REGULATION_OF_CELLULAR_RESPONSE_TO_HYPOXIA	34.2463	6.58078e-10
REGULATION_OF_METALLOENDOPEPTIDASE_ACTIVITY	34.2463	6.58078e-10
REGULATION_OF_SENSORY_PERCEPTION	15.2533	6.71718e-10
POSITIVE_REGULATION_OF_LIPID_KINASE_ACTIVITY	15.2533	6.71718e-10
POSITIVE_REGULATION_OF_PEPTIDYL_THREONINE_PHOSPHORYLATION	18.6339	7.0125e-10
LIVER_REGENERATION	18.6339	7.0125e-10
INTEGRIN_MEDIATED_SIGNALING_PATHWAY	6.45027	7.09966e-10
MOLTING_CYCLE	6.45027	7.09966e-10
MITOCHONDRIAL_OUTER_MEMBRANE_PERMEABILIZATION_INVOLVED_IN_PROGRAMMED_CELL_DEATH	12.8013	7.14574e-10
NEGATIVE_REGULATION_OF_RESPONSE_TO_ENDOPLASMIC_RETICULUM_STRESS	12.8013	7.14574e-10
REGULATION_OF_MICROTUBULE_BASED_PROCESS	4.15852	7.7667e-10
CELL_CELL_JUNCTION_ASSEMBLY	5.42814	7.76788e-10
POLYOL_BIOSYNTHETIC_PROCESS	9.75331	7.8898e-10
REGULATION_OF_GLYCOPROTEIN_METABOLIC_PROCESS	9.75331	7.8898e-10
VISUAL_BEHAVIOR	10.9641	8.22046e-10
POSITIVE_REGULATION_OF_STRIATED_MUSCLE_CELL_DIFFERENTIATION	10.9641	8.22046e-10
REGULATION_OF_CYTOSOLIC_CALCIUM_ION_CONCENTRATION	10.9641	8.22046e-10
REGULATION_OF_TRANSCRIPTION_REGULATORY_REGION_DNA_BINDING	10.9641	8.22046e-10
CARDIAC_VENTRICLE_MORPHOGENESIS	8.73648	8.38357e-10
REGULATION_OF_CARTILAGE_DEVELOPMENT	8.73648	8.38357e-10
LIPID_DIGESTION	23.4382	8.48519e-10
POSITIVE_REGULATION_OF_FATTY_ACID_BIOSYNTHETIC_PROCESS	23.4382	8.48519e-10
CELL_JUNCTION_DISASSEMBLY	23.4382	8.48519e-10
DNA_METHYLATION_OR_DEMETHYLATION	6.76549	9.37213e-10
MACROPHAGE_CYTOKINE_PRODUCTION	14.6439	9.65156e-10
RESPONSE_TO_GROWTH_HORMONE	14.6439	9.65156e-10
NEGATIVE_REGULATION_OF_ALPHA_BETA_T_CELL_ACTIVATION	12.4035	9.75429e-10
REGULATION_OF_AMINO_ACID_TRANSPORT	12.4035	9.75429e-10
ALPHA_AMINO_ACID_CATABOLIC_PROCESS	7.24815	9.91735e-10
POSITIVE_REGULATION_OF_INTRINSIC_APOPTOTIC_SIGNALING_PATHWAY	9.54993	1.00497e-09
NEGATIVE_REGULATION_OF_BIOMINERALIZATION	17.6534	1.07514e-09
POSITIVE_REGULATION_OF_NK_T_CELL_ACTIVATION	106.319	1.1475e-09
MAMMARY_GLAND_INVOLUTION	106.319	1.1475e-09
NEGATIVE_REGULATION_OF_CELLULAR_RESPONSE_TO_HYPOXIA	106.319	1.1475e-09
INTRINSIC_APOPTOTIC_SIGNALING_PATHWAY_IN_RESPONSE_TO_HYPOXIA	106.319	1.1475e-09
NERVE_DEVELOPMENT	7.76339	1.17485e-09
POSITIVE_REGULATION_OF_CALCIUM_ION_TRANSPORT_INTO_CYTOSOL	48.6809	1.19702e-09
RESPONSE_TO_LAMINAR_FLUID_SHEAR_STRESS	48.6809	1.19702e-09
HEPATOCYTE_GROWTH_FACTOR_RECEPTOR_SIGNALING_PATHWAY	48.6809	1.19702e-09
NK_T_CELL_ACTIVATION	48.6809	1.19702e-09
NEGATIVE_REGULATION_OF_EXTRACELLULAR_MATRIX_ORGANIZATION	48.6809	1.19702e-09
NUCLEOSIDE_PHOSPHATE_BIOSYNTHETIC_PROCESS	3.75155	1.24227e-09
POSITIVE_REGULATION_OF_T_HELPER_1_TYPE_IMMUNE_RESPONSE	30.4464	1.2786e-09
SEQUESTERING_OF_TRIGLYCERIDE	30.4464	1.2786e-09
NEGATIVE_REGULATION_OF_BONE_REMODELING	30.4464	1.2786e-09
REGULATION_OF_NEUROTRANSMITTER_UPTAKE	30.4464	1.2786e-09
POSITIVE_REGULATION_OF_NITRIC_OXIDE_SYNTHASE_BIOSYNTHETIC_PROCESS	30.4464	1.2786e-09
POSITIVE_REGULATION_OF_LYMPHOCYTE_APOPTOTIC_PROCESS	30.4464	1.2786e-09
CELLULAR_RESPONSE_TO_ATP	30.4464	1.2786e-09
CATECHOLAMINE_UPTAKE	30.4464	1.2786e-09
IMMUNOGLOBULIN_PRODUCTION_INVOLVED_IN_IMMUNOGLOBULIN_MEDIATED_IMMUNE_RESPONSE	8.43511	1.28997e-09
DNA_DAMAGE_RESPONSE_SIGNAL_TRANSDUCTION_BY_P53_CLASS_MEDIATOR	8.43511	1.28997e-09
MODULATION_BY_HOST_OF_VIRAL_PROCESS	12.0214	1.31986e-09
NEGATIVE_REGULATION_OF_OSSIFICATION	14.0803	1.36949e-09
REGULATION_OF_INTRINSIC_APOPTOTIC_SIGNALING_PATHWAY_IN_RESPONSE_TO_DNA_DAMAGE	14.0803	1.36949e-09
STRIATED_MUSCLE_ADAPTATION	10.4289	1.40242e-09
POSITIVE_REGULATION_OF_NEUROTRANSMITTER_TRANSPORT	21.7642	1.41274e-09
POSITIVE_REGULATION_OF_MACROPHAGE_CYTOKINE_PRODUCTION	21.7642	1.41274e-09
MICROTUBULE_CYTOSKELETON_ORGANIZATION	2.69455	1.46248e-09
REGULATION_OF_EXTENT_OF_CELL_GROWTH	6.53699	1.53863e-09
CELLULAR_RESPONSE_TO_IONIZING_RADIATION	8.29211	1.59125e-09
NEGATIVE_REGULATION_OF_CELL_CYCLE_G1_S_PHASE_TRANSITION	6.97336	1.68891e-09
NEGATIVE_REGULATION_OF_PROTEIN_CONTAINING_COMPLEX_ASSEMBLY	5.44013	1.72279e-09
POSITIVE_REGULATION_OF_CELL_MATRIX_ADHESION	10.1794	1.81491e-09
REGULATION_OF_PHOSPHATIDYLINOSITOL_3_KINASE_ACTIVITY	10.1794	1.81491e-09
POSITIVE_REGULATION_OF_BIOMINERALIZATION	10.1794	1.81491e-09
NEGATIVE_REGULATION_OF_MITOTIC_CELL_CYCLE	4.11	1.86059e-09
REGULATION_OF_HORMONE_METABOLIC_PROCESS	13.5585	1.9205e-09
NEGATIVE_REGULATION_OF_ORGAN_GROWTH	13.5585	1.9205e-09
PROTEIN_LOCALIZATION_TO_CELL_JUNCTION	6.88603	2.00738e-09
NEGATIVE_REGULATION_OF_CELL_SUBSTRATE_ADHESION	8.98774	2.01849e-09
ORGANOPHOSPHATE_CATABOLIC_PROCESS	5.11339	2.1534e-09
ANTERIOR_POSTERIOR_PATTERN_SPECIFICATION	4.34392	2.26064e-09
REGULATION_OF_SYSTEMIC_ARTERIAL_BLOOD_PRESSURE_BY_RENIN_ANGIOTENSIN	20.3135	2.2868e-09
REGULATION_OF_INSULIN_LIKE_GROWTH_FACTOR_RECEPTOR_SIGNALING_PATHWAY	20.3135	2.2868e-09
NEGATIVE_REGULATION_OF_MYOBLAST_DIFFERENTIATION	20.3135	2.2868e-09
POSITIVE_REGULATION_OF_ALPHA_BETA_T_CELL_PROLIFERATION	20.3135	2.2868e-09
DECIDUALIZATION	20.3135	2.2868e-09
POSITIVE_REGULATION_OF_CELLULAR_RESPONSE_TO_INSULIN_STIMULUS	20.3135	2.2868e-09
MITOTIC_NUCLEAR_DIVISION	3.56317	2.33043e-09
REGULATION_OF_MYOTUBE_DIFFERENTIATION	11.3367	2.35778e-09
REGULATION_OF_MYELINATION	11.3367	2.35778e-09
PROTEIN_DESTABILIZATION	11.3367	2.35778e-09
REGULATION_OF_ENDOTHELIAL_CELL_DIFFERENTIATION	11.3367	2.35778e-09
ACID_SECRETION	11.3367	2.35778e-09
VITAMIN_TRANSPORT	11.3367	2.35778e-09
MACROPHAGE_ACTIVATION_INVOLVED_IN_IMMUNE_RESPONSE	27.4184	2.36002e-09
SEROTONIN_TRANSPORT	27.4184	2.36002e-09
NEGATIVE_REGULATION_OF_PLATELET_ACTIVATION	27.4184	2.36002e-09
RESPONSE_TO_HEPATOCYTE_GROWTH_FACTOR	27.4184	2.36002e-09
CD4_POSITIVE_ALPHA_BETA_T_CELL_CYTOKINE_PRODUCTION	27.4184	2.36002e-09
POSITIVE_REGULATION_OF_SMOOTH_MUSCLE_CELL_DIFFERENTIATION	27.4184	2.36002e-09
RENAL_SYSTEM_VASCULATURE_DEVELOPMENT	15.9683	2.39433e-09
REGULATION_OF_ENDOPLASMIC_RETICULUM_STRESS_INDUCED_INTRINSIC_APOPTOTIC_SIGNALING_PATHWAY	15.9683	2.39433e-09
ENDOPLASMIC_RETICULUM_UNFOLDED_PROTEIN_RESPONSE	8.02024	2.3959e-09
EXPORT_ACROSS_PLASMA_MEMBRANE	8.02024	2.3959e-09
REGULATION_OF_PEPTIDYL_LYSINE_ACETYLATION	8.02024	2.3959e-09
PROTEIN_MODIFICATION_BY_SMALL_PROTEIN_CONJUGATION_OR_REMOVAL	2.28623	2.42003e-09
ACTIN_CYTOSKELETON_REORGANIZATION	6.3234	2.48192e-09
STRESS_FIBER_ASSEMBLY	6.3234	2.48192e-09
B_CELL_ACTIVATION_INVOLVED_IN_IMMUNE_RESPONSE	7.32287	2.49953e-09
POSITIVE_REGULATION_OF_PROTEIN_LOCALIZATION_TO_CELL_PERIPHERY	8.81481	2.52401e-09
MITOCHONDRIAL_FISSION	13.074	2.66362e-09
POSITIVE_REGULATION_OF_ERBB_SIGNALING_PATHWAY	13.074	2.66362e-09
NERVOUS_SYSTEM_PROCESS_INVOLVED_IN_REGULATION_OF_SYSTEMIC_ARTERIAL_BLOOD_PRESSURE	40.567	2.71422e-09
REGULATION_OF_PROSTAGLANDIN_SECRETION	40.567	2.71422e-09
INDUCTION_OF_POSITIVE_CHEMOTAXIS	40.567	2.71422e-09
RESPONSE_TO_UV_A	40.567	2.71422e-09
NEGATIVE_REGULATION_OF_CARDIOCYTE_DIFFERENTIATION	40.567	2.71422e-09
OVARIAN_FOLLICLE_DEVELOPMENT	9.71734	2.98755e-09
IRON_ION_TRANSPORT	9.71734	2.98755e-09
NEGATIVE_REGULATION_OF_LYMPHOCYTE_DIFFERENTIATION	9.71734	2.98755e-09
REGULATION_OF_CELL_ADHESION_MEDIATED_BY_INTEGRIN	11.0221	3.11524e-09
REGULATION_OF_GENE_SILENCING_BY_RNA	11.0221	3.11524e-09
SYNCYTIUM_FORMATION	8.64842	3.14282e-09
ZYMOGEN_ACTIVATION	8.64842	3.14282e-09
HORMONE_BIOSYNTHETIC_PROCESS	8.64842	3.14282e-09
TERPENOID_METABOLIC_PROCESS	6.63669	3.32567e-09
CARDIAC_CONDUCTION	6.63669	3.32567e-09
CELL_CELL_ADHESION_VIA_PLASMA_MEMBRANE_ADHESION_MOLECULES	3.77093	3.41705e-09
POSITIVE_REGULATION_OF_SYNAPTIC_TRANSMISSION_GLUTAMATERGIC	15.243	3.48744e-09
TRANSEPITHELIAL_TRANSPORT	15.243	3.48744e-09
PROTEIN_TETRAMERIZATION	7.12239	3.58657e-09
REGULATION_OF_THE_FORCE_OF_HEART_CONTRACTION	19.0442	3.60915e-09
MODULATION_OF_PROCESS_OF_ANOTHER_ORGANISM	19.0442	3.60915e-09
NEGATIVE_REGULATION_OF_ALPHA_BETA_T_CELL_DIFFERENTIATION	19.0442	3.60915e-09
INFLAMMASOME_COMPLEX_ASSEMBLY	19.0442	3.60915e-09
NEGATIVE_REGULATION_OF_CELLULAR_SENESCENCE	19.0442	3.60915e-09
REGULATION_OF_T_CELL_MEDIATED_CYTOTOXICITY	12.6232	3.65608e-09
RESPONSE_TO_COPPER_ION	12.6232	3.65608e-09
REGULATION_OF_T_CELL_APOPTOTIC_PROCESS	12.6232	3.65608e-09
CARDIAC_CHAMBER_MORPHOGENESIS	5.77871	3.71751e-09
PERIPHERAL_NERVOUS_SYSTEM_AXON_REGENERATION	71.0806	3.71856e-09
RESPONSE_TO_FOLIC_ACID	71.0806	3.71856e-09
POSITIVE_REGULATION_OF_CARDIAC_MUSCLE_CONTRACTION	71.0806	3.71856e-09
REGULATION_OF_APOPTOTIC_CELL_CLEARANCE	71.0806	3.71856e-09
MESONEPHROS_DEVELOPMENT	6.55754	3.91826e-09
PLASMA_MEMBRANE_ORGANIZATION	4.93348	3.93722e-09
CELLULAR_MONOVALENT_INORGANIC_CATION_HOMEOSTASIS	6.1233	3.93775e-09
MITOCHONDRION_LOCALIZATION	10.7214	4.08654e-09
[truncated: 858 more rows]
