# Supplementary material for: Comorbidity Genes of Alzheimer’s Disease and Type 2 Diabetes Associated with Memory and Cognitive Function
Source: Int J Mol Sci. 2024 Feb 12;25(4):2211. doi: 10.3390/ijms25042211 (PMC10889845; doi:10.3390/ijms25042211)
Supplement: Supplementary file 1 [file ijms-25-02211-s001.zip › Table S3.xlsx]

## Sheet: Table S3
Pathway	Odds ratio	P value
KEGG_PATHWAYS_IN_CANCER	21.6277	9.21824e-41
KEGG_NEUROTROPHIN_SIGNALING_PATHWAY	36.6217	9.14184e-32
KEGG_LEISHMANIA_INFECTION	59.3255	2.16677e-30
KEGG_TOLL_LIKE_RECEPTOR_SIGNALING_PATHWAY	41.254	1.17877e-29
KEGG_CYTOKINE_CYTOKINE_RECEPTOR_INTERACTION	18.4529	1.46386e-28
KEGG_FOCAL_ADHESION	22.0403	2.64231e-27
KEGG_MAPK_SIGNALING_PATHWAY	17.6083	3.42101e-27
KEGG_COLORECTAL_CANCER	59.6652	1.10276e-26
KEGG_APOPTOSIS	42.6254	1.42648e-26
KEGG_PROSTATE_CANCER	41.362	2.48865e-26
KEGG_ADIPOCYTOKINE_SIGNALING_PATHWAY	53.2552	6.6855e-26
KEGG_PANCREATIC_CANCER	50.0945	1.82531e-25
KEGG_FC_EPSILON_RI_SIGNALING_PATHWAY	42.4891	2.79307e-24
KEGG_FC_GAMMA_R_MEDIATED_PHAGOCYTOSIS	35.1707	5.77351e-24
KEGG_CHEMOKINE_SIGNALING_PATHWAY	20.2863	7.10681e-24
KEGG_TYPE_II_DIABETES_MELLITUS	70.346	7.15678e-24
KEGG_VEGF_SIGNALING_PATHWAY	41.6318	5.15956e-23
KEGG_MTOR_SIGNALING_PATHWAY	60.3372	5.51716e-23
KEGG_INSULIN_SIGNALING_PATHWAY	24.0772	6.5584e-22
KEGG_ALDOSTERONE_REGULATED_SODIUM_REABSORPTION	68.5403	4.11216e-21
KEGG_GLIOMA	43.9802	4.25652e-21
KEGG_JAK_STAT_SIGNALING_PATHWAY	20.8164	1.0757e-20
KEGG_ERBB_SIGNALING_PATHWAY	32.4897	2.98172e-20
KEGG_ALZHEIMERS_DISEASE	19.2187	4.98714e-20
KEGG_T_CELL_RECEPTOR_SIGNALING_PATHWAY	26.6382	6.98674e-20
KEGG_RENAL_CELL_CARCINOMA	36.6946	6.75721e-19
KEGG_NOD_LIKE_RECEPTOR_SIGNALING_PATHWAY	39.4445	3.33492e-18
KEGG_ENDOMETRIAL_CANCER	45.3374	8.44203e-18
KEGG_AMYOTROPHIC_LATERAL_SCLEROSIS_ALS	44.1996	1.13864e-17
KEGG_MELANOMA	33.0798	3.06317e-17
KEGG_ACUTE_MYELOID_LEUKEMIA	40.0533	3.53644e-17
KEGG_NATURAL_KILLER_CELL_MEDIATED_CYTOTOXICITY	18.8287	1.49169e-16
KEGG_CHRONIC_MYELOID_LEUKEMIA	29.2255	1.50644e-15
KEGG_LEUKOCYTE_TRANSENDOTHELIAL_MIGRATION	19.9929	2.90576e-15
KEGG_SMALL_CELL_LUNG_CANCER	24.6141	1.19035e-14
KEGG_NON_SMALL_CELL_LUNG_CANCER	34.9902	2.43986e-14
KEGG_B_CELL_RECEPTOR_SIGNALING_PATHWAY	25.7298	6.26073e-14
KEGG_CALCIUM_SIGNALING_PATHWAY	13.0827	2.24078e-13
KEGG_NEUROACTIVE_LIGAND_RECEPTOR_INTERACTION	9.90095	2.41717e-13
KEGG_PROGESTERONE_MEDIATED_OOCYTE_MATURATION	22.1757	3.38933e-13
KEGG_TYPE_I_DIABETES_MELLITUS	36.9048	2.21717e-12
KEGG_REGULATION_OF_ACTIN_CYTOSKELETON	10.0801	4.15477e-11
KEGG_GNRH_SIGNALING_PATHWAY	16.4983	5.96566e-11
KEGG_HYPERTROPHIC_CARDIOMYOPATHY_HCM	18.6426	1.13379e-10
KEGG_HEMATOPOIETIC_CELL_LINEAGE	17.6553	1.90937e-10
KEGG_ADHERENS_JUNCTION	19.3212	5.75343e-10
KEGG_RENIN_ANGIOTENSIN_SYSTEM	65.8033	3.75793e-09
KEGG_VASCULAR_SMOOTH_MUSCLE_CONTRACTION	12.9012	3.93887e-09
KEGG_WNT_SIGNALING_PATHWAY	10.551	6.4519e-09
KEGG_LONG_TERM_DEPRESSION	17.9072	7.51951e-09
KEGG_MELANOGENESIS	13.3652	1.44628e-08
KEGG_PRION_DISEASES	30.2025	1.48412e-08
KEGG_PHOSPHATIDYLINOSITOL_SIGNALING_SYSTEM	16.3052	1.57629e-08
KEGG_ALLOGRAFT_REJECTION	28.1635	2.23984e-08
KEGG_TGF_BETA_SIGNALING_PATHWAY	14.1887	4.72802e-08
KEGG_GRAFT_VERSUS_HOST_DISEASE	24.856	4.75259e-08
KEGG_GAP_JUNCTION	13.478	7.05141e-08
KEGG_THYROID_CANCER	31.4278	1.32522e-07
KEGG_PPAR_SIGNALING_PATHWAY	13.6236	1.86595e-06
KEGG_RIG_I_LIKE_RECEPTOR_SIGNALING_PATHWAY	13.1991	2.26734e-06
KEGG_HUNTINGTONS_DISEASE	7.06235	3.5386e-06
KEGG_ASTHMA	24.0202	4.77429e-06
KEGG_INOSITOL_PHOSPHATE_METABOLISM	15.0535	6.04215e-06
KEGG_CYTOSOLIC_DNA_SENSING_PATHWAY	14.7468	6.73449e-06
KEGG_ARACHIDONIC_ACID_METABOLISM	13.8977	9.20652e-06
KEGG_REGULATION_OF_AUTOPHAGY	20.0131	1.05091e-05
KEGG_TIGHT_JUNCTION	7.86332	1.56756e-05
KEGG_EPITHELIAL_CELL_SIGNALING_IN_HELICOBACTER_PYLORI_INFECTION	11.6495	2.32082e-05
KEGG_COMPLEMENT_AND_COAGULATION_CASCADES	11.4643	2.52407e-05
KEGG_BLADDER_CANCER	16.2303	2.62477e-05
KEGG_LONG_TERM_POTENTIATION	11.2863	2.74141e-05
KEGG_VIRAL_MYOCARDITIS	11.2863	2.74141e-05
KEGG_INTESTINAL_IMMUNE_NETWORK_FOR_IGA_PRODUCTION	13.9689	5.07074e-05
KEGG_MATURITY_ONSET_DIABETES_OF_THE_YOUNG	22.8106	5.29593e-05
KEGG_LINOLEIC_ACID_METABOLISM	19.1666	9.68433e-05
KEGG_AXON_GUIDANCE	6.91641	0.000112659
KEGG_DILATED_CARDIOMYOPATHY	8.59371	0.000113162
