# Supplementary material for: Comorbidity Genes of Alzheimer’s Disease and Type 2 Diabetes Associated with Memory and Cognitive Function
Source: Int J Mol Sci. 2024 Feb 12;25(4):2211. doi: 10.3390/ijms25042211 (PMC10889845; doi:10.3390/ijms25042211)
Supplement: Supplementary file 1 [file ijms-25-02211-s001.zip › Table S6.xlsx]

## Sheet: Table S6
term ID	term description	observed gene count	background gene count	strength	false discovery rate	matching proteins in your network (IDs)	matching proteins in your network (labels)
GO:0045944	Positive regulation of transcription by RNA polymerase II	10	1250	1.2	1.73e-08	9606.ENSP00000249396,9606.ENSP00000263253,9606.ENSP00000305422,9606.ENSP00000340874,9606.ENSP00000357000,9606.ENSP00000368880,9606.ENSP00000379330,9606.ENSP00000381382,9606.ENSP00000453095,9606.ENSP00000498587	SIRT2,EP300,CEBPB,MEF2C,USF1,FOXO1,NFATC2,TCF4,MEF2A,NOTCH1
GO:0000122	Negative regulation of transcription by RNA polymerase II	8	971	1.21	2.33e-06	9606.ENSP00000249396,9606.ENSP00000263253,9606.ENSP00000305422,9606.ENSP00000340874,9606.ENSP00000368880,9606.ENSP00000379330,9606.ENSP00000453095,9606.ENSP00000498587	SIRT2,EP300,CEBPB,MEF2C,FOXO1,NFATC2,MEF2A,NOTCH1
GO:0070482	Response to oxygen levels	5	318	1.49	0.00013	9606.ENSP00000249396,9606.ENSP00000263253,9606.ENSP00000357000,9606.ENSP00000368880,9606.ENSP00000498587	SIRT2,EP300,USF1,FOXO1,NOTCH1
GO:0009719	Response to endogenous stimulus	7	1363	1.01	0.00037	9606.ENSP00000249396,9606.ENSP00000263253,9606.ENSP00000305422,9606.ENSP00000340874,9606.ENSP00000357000,9606.ENSP00000368880,9606.ENSP00000498587	SIRT2,EP300,CEBPB,MEF2C,USF1,FOXO1,NOTCH1
GO:0030154	Cell differentiation	9	3507	0.7	0.00066	9606.ENSP00000249396,9606.ENSP00000263253,9606.ENSP00000305422,9606.ENSP00000340874,9606.ENSP00000368880,9606.ENSP00000379330,9606.ENSP00000381382,9606.ENSP00000453095,9606.ENSP00000498587	SIRT2,EP300,CEBPB,MEF2C,FOXO1,NFATC2,TCF4,MEF2A,NOTCH1
GO:0033554	Cellular response to stress	7	1572	0.94	0.00081	9606.ENSP00000249396,9606.ENSP00000263253,9606.ENSP00000305422,9606.ENSP00000340874,9606.ENSP00000368880,9606.ENSP00000379330,9606.ENSP00000498587	SIRT2,EP300,CEBPB,MEF2C,FOXO1,NFATC2,NOTCH1
GO:0043618	Regulation of transcription from RNA polymerase II promoter in response to stress	3	49	2.08	0.00081	9606.ENSP00000249396,9606.ENSP00000305422,9606.ENSP00000498587	SIRT2,CEBPB,NOTCH1
GO:0045595	Regulation of cell differentiation	7	1582	0.94	0.00081	9606.ENSP00000249396,9606.ENSP00000305422,9606.ENSP00000340874,9606.ENSP00000368880,9606.ENSP00000379330,9606.ENSP00000381382,9606.ENSP00000498587	SIRT2,CEBPB,MEF2C,FOXO1,NFATC2,TCF4,NOTCH1
GO:0010243	Response to organonitrogen compound	6	963	1.09	0.0009	9606.ENSP00000249396,9606.ENSP00000305422,9606.ENSP00000340874,9606.ENSP00000357000,9606.ENSP00000368880,9606.ENSP00000498587	SIRT2,CEBPB,MEF2C,USF1,FOXO1,NOTCH1
GO:0061061	Muscle structure development	5	498	1.3	0.0009	9606.ENSP00000263253,9606.ENSP00000340874,9606.ENSP00000379330,9606.ENSP00000453095,9606.ENSP00000498587	EP300,MEF2C,NFATC2,MEF2A,NOTCH1
GO:0006351	Transcription, DNA-templated	5	518	1.28	0.001	9606.ENSP00000263253,9606.ENSP00000305422,9606.ENSP00000379330,9606.ENSP00000453095,9606.ENSP00000498587	EP300,CEBPB,NFATC2,MEF2A,NOTCH1
GO:0010611	Regulation of cardiac muscle hypertrophy	3	55	2.03	0.001	9606.ENSP00000368880,9606.ENSP00000453095,9606.ENSP00000498587	FOXO1,MEF2A,NOTCH1
GO:0006915	Apoptotic process	6	1041	1.06	0.0011	9606.ENSP00000263253,9606.ENSP00000305422,9606.ENSP00000340874,9606.ENSP00000368880,9606.ENSP00000453095,9606.ENSP00000498587	EP300,CEBPB,MEF2C,FOXO1,MEF2A,NOTCH1
GO:0048468	Cell development	7	1719	0.9	0.0011	9606.ENSP00000249396,9606.ENSP00000263253,9606.ENSP00000305422,9606.ENSP00000340874,9606.ENSP00000379330,9606.ENSP00000453095,9606.ENSP00000498587	SIRT2,EP300,CEBPB,MEF2C,NFATC2,MEF2A,NOTCH1
GO:0070887	Cellular response to chemical stimulus	8	2609	0.78	0.0011	9606.ENSP00000249396,9606.ENSP00000263253,9606.ENSP00000305422,9606.ENSP00000340874,9606.ENSP00000357000,9606.ENSP00000368880,9606.ENSP00000453095,9606.ENSP00000498587	SIRT2,EP300,CEBPB,MEF2C,USF1,FOXO1,MEF2A,NOTCH1
GO:0048583	Regulation of response to stimulus	9	3931	0.65	0.0012	9606.ENSP00000249396,9606.ENSP00000263253,9606.ENSP00000305422,9606.ENSP00000340874,9606.ENSP00000357000,9606.ENSP00000368880,9606.ENSP00000379330,9606.ENSP00000453095,9606.ENSP00000498587	SIRT2,EP300,CEBPB,MEF2C,USF1,FOXO1,NFATC2,MEF2A,NOTCH1
GO:0071216	Cellular response to biotic stimulus	4	232	1.53	0.0012	9606.ENSP00000249396,9606.ENSP00000305422,9606.ENSP00000340874,9606.ENSP00000498587	SIRT2,CEBPB,MEF2C,NOTCH1
GO:0042221	Response to chemical	9	4010	0.65	0.0013	9606.ENSP00000249396,9606.ENSP00000263253,9606.ENSP00000305422,9606.ENSP00000340874,9606.ENSP00000357000,9606.ENSP00000368880,9606.ENSP00000379330,9606.ENSP00000453095,9606.ENSP00000498587	SIRT2,EP300,CEBPB,MEF2C,USF1,FOXO1,NFATC2,MEF2A,NOTCH1
GO:0071417	Cellular response to organonitrogen compound	5	574	1.23	0.0013	9606.ENSP00000249396,9606.ENSP00000305422,9606.ENSP00000340874,9606.ENSP00000357000,9606.ENSP00000368880	SIRT2,CEBPB,MEF2C,USF1,FOXO1
GO:0071495	Cellular response to endogenous stimulus	6	1103	1.03	0.0013	9606.ENSP00000249396,9606.ENSP00000305422,9606.ENSP00000340874,9606.ENSP00000357000,9606.ENSP00000368880,9606.ENSP00000498587	SIRT2,CEBPB,MEF2C,USF1,FOXO1,NOTCH1
GO:0010628	Positive regulation of gene expression	6	1146	1.01	0.0016	9606.ENSP00000263253,9606.ENSP00000305422,9606.ENSP00000340874,9606.ENSP00000379330,9606.ENSP00000453095,9606.ENSP00000498587	EP300,CEBPB,MEF2C,NFATC2,MEF2A,NOTCH1
GO:0042692	Muscle cell differentiation	4	269	1.47	0.0017	9606.ENSP00000340874,9606.ENSP00000379330,9606.ENSP00000453095,9606.ENSP00000498587	MEF2C,NFATC2,MEF2A,NOTCH1
GO:0001666	Response to hypoxia	4	278	1.45	0.0018	9606.ENSP00000249396,9606.ENSP00000263253,9606.ENSP00000357000,9606.ENSP00000498587	SIRT2,EP300,USF1,NOTCH1
GO:0007517	Muscle organ development	4	303	1.42	0.0023	9606.ENSP00000263253,9606.ENSP00000340874,9606.ENSP00000453095,9606.ENSP00000498587	EP300,MEF2C,MEF2A,NOTCH1
GO:0071310	Cellular response to organic substance	7	2019	0.83	0.0023	9606.ENSP00000249396,9606.ENSP00000263253,9606.ENSP00000305422,9606.ENSP00000340874,9606.ENSP00000357000,9606.ENSP00000368880,9606.ENSP00000498587	SIRT2,EP300,CEBPB,MEF2C,USF1,FOXO1,NOTCH1
GO:2000177	Regulation of neural precursor cell proliferation	3	90	1.82	0.0024	9606.ENSP00000249396,9606.ENSP00000368880,9606.ENSP00000498587	SIRT2,FOXO1,NOTCH1
GO:0060537	Muscle tissue development	4	323	1.39	0.0029	9606.ENSP00000263253,9606.ENSP00000340874,9606.ENSP00000453095,9606.ENSP00000498587	EP300,MEF2C,MEF2A,NOTCH1
GO:0003211	Cardiac ventricle formation	2	10	2.6	0.003	9606.ENSP00000340874,9606.ENSP00000498587	MEF2C,NOTCH1
GO:0002237	Response to molecule of bacterial origin	4	333	1.37	0.0031	9606.ENSP00000249396,9606.ENSP00000305422,9606.ENSP00000340874,9606.ENSP00000498587	SIRT2,CEBPB,MEF2C,NOTCH1
GO:0051094	Positive regulation of developmental process	6	1332	0.95	0.0031	9606.ENSP00000249396,9606.ENSP00000305422,9606.ENSP00000340874,9606.ENSP00000379330,9606.ENSP00000381382,9606.ENSP00000498587	SIRT2,CEBPB,MEF2C,NFATC2,TCF4,NOTCH1
GO:0070167	Regulation of biomineral tissue development	3	100	1.77	0.0031	9606.ENSP00000305422,9606.ENSP00000340874,9606.ENSP00000498587	CEBPB,MEF2C,NOTCH1
GO:0007399	Nervous system development	7	2188	0.8	0.0035	9606.ENSP00000249396,9606.ENSP00000263253,9606.ENSP00000305422,9606.ENSP00000340874,9606.ENSP00000381382,9606.ENSP00000453095,9606.ENSP00000498587	SIRT2,EP300,CEBPB,MEF2C,TCF4,MEF2A,NOTCH1
GO:0009725	Response to hormone	5	762	1.11	0.0035	9606.ENSP00000263253,9606.ENSP00000340874,9606.ENSP00000357000,9606.ENSP00000368880,9606.ENSP00000498587	EP300,MEF2C,USF1,FOXO1,NOTCH1
GO:0080134	Regulation of response to stress	6	1373	0.93	0.0035	9606.ENSP00000249396,9606.ENSP00000263253,9606.ENSP00000305422,9606.ENSP00000340874,9606.ENSP00000357000,9606.ENSP00000368880	SIRT2,EP300,CEBPB,MEF2C,USF1,FOXO1
GO:0006366	Transcription by RNA polymerase II	4	357	1.34	0.0038	9606.ENSP00000263253,9606.ENSP00000305422,9606.ENSP00000379330,9606.ENSP00000498587	EP300,CEBPB,NFATC2,NOTCH1
GO:0061418	Regulation of transcription from RNA polymerase II promoter in response to hypoxia	2	12	2.52	0.0038	9606.ENSP00000249396,9606.ENSP00000498587	SIRT2,NOTCH1
GO:0006950	Response to stress	8	3358	0.67	0.0041	9606.ENSP00000249396,9606.ENSP00000263253,9606.ENSP00000305422,9606.ENSP00000340874,9606.ENSP00000357000,9606.ENSP00000368880,9606.ENSP00000379330,9606.ENSP00000498587	SIRT2,EP300,CEBPB,MEF2C,USF1,FOXO1,NFATC2,NOTCH1
GO:0035051	Cardiocyte differentiation	3	113	1.72	0.0041	9606.ENSP00000340874,9606.ENSP00000453095,9606.ENSP00000498587	MEF2C,MEF2A,NOTCH1
GO:0045444	Fat cell differentiation	3	118	1.7	0.0044	9606.ENSP00000263253,9606.ENSP00000305422,9606.ENSP00000368880	EP300,CEBPB,FOXO1
GO:0045667	Regulation of osteoblast differentiation	3	125	1.67	0.0052	9606.ENSP00000305422,9606.ENSP00000340874,9606.ENSP00000498587	CEBPB,MEF2C,NOTCH1
GO:0055012	Ventricular cardiac muscle cell differentiation	2	15	2.42	0.0052	9606.ENSP00000340874,9606.ENSP00000453095	MEF2C,MEF2A
GO:0035556	Intracellular signal transduction	6	1518	0.89	0.0055	9606.ENSP00000249396,9606.ENSP00000263253,9606.ENSP00000305422,9606.ENSP00000340874,9606.ENSP00000379330,9606.ENSP00000453095	SIRT2,EP300,CEBPB,MEF2C,NFATC2,MEF2A
GO:0007519	Skeletal muscle tissue development	3	133	1.65	0.006	9606.ENSP00000263253,9606.ENSP00000340874,9606.ENSP00000498587	EP300,MEF2C,NOTCH1
GO:0045597	Positive regulation of cell differentiation	5	876	1.05	0.006	9606.ENSP00000249396,9606.ENSP00000305422,9606.ENSP00000340874,9606.ENSP00000381382,9606.ENSP00000498587	SIRT2,CEBPB,MEF2C,TCF4,NOTCH1
GO:1901700	Response to oxygen-containing compound	6	1547	0.88	0.006	9606.ENSP00000249396,9606.ENSP00000305422,9606.ENSP00000340874,9606.ENSP00000357000,9606.ENSP00000368880,9606.ENSP00000498587	SIRT2,CEBPB,MEF2C,USF1,FOXO1,NOTCH1
GO:0045598	Regulation of fat cell differentiation	3	135	1.64	0.0061	9606.ENSP00000249396,9606.ENSP00000305422,9606.ENSP00000368880	SIRT2,CEBPB,FOXO1
GO:0051147	Regulation of muscle cell differentiation	3	137	1.63	0.0063	9606.ENSP00000340874,9606.ENSP00000379330,9606.ENSP00000498587	MEF2C,NFATC2,NOTCH1
GO:0048856	Anatomical structure development	9	5117	0.54	0.0064	9606.ENSP00000249396,9606.ENSP00000263253,9606.ENSP00000305422,9606.ENSP00000340874,9606.ENSP00000368880,9606.ENSP00000379330,9606.ENSP00000381382,9606.ENSP00000453095,9606.ENSP00000498587	SIRT2,EP300,CEBPB,MEF2C,FOXO1,NFATC2,TCF4,MEF2A,NOTCH1
GO:0072359	Circulatory system development	5	901	1.04	0.0064	9606.ENSP00000263253,9606.ENSP00000340874,9606.ENSP00000368880,9606.ENSP00000453095,9606.ENSP00000498587	EP300,MEF2C,FOXO1,MEF2A,NOTCH1
GO:0007154	Cell communication	9	5165	0.54	0.0066	9606.ENSP00000249396,9606.ENSP00000263253,9606.ENSP00000305422,9606.ENSP00000340874,9606.ENSP00000357000,9606.ENSP00000368880,9606.ENSP00000379330,9606.ENSP00000453095,9606.ENSP00000498587	SIRT2,EP300,CEBPB,MEF2C,USF1,FOXO1,NFATC2,MEF2A,NOTCH1
GO:0030220	Platelet formation	2	18	2.34	0.0066	9606.ENSP00000263253,9606.ENSP00000340874	EP300,MEF2C
GO:0071453	Cellular response to oxygen levels	3	152	1.59	0.0078	9606.ENSP00000249396,9606.ENSP00000368880,9606.ENSP00000498587	SIRT2,FOXO1,NOTCH1
GO:0032101	Regulation of response to external stimulus	5	964	1.01	0.0081	9606.ENSP00000249396,9606.ENSP00000263253,9606.ENSP00000305422,9606.ENSP00000357000,9606.ENSP00000498587	SIRT2,EP300,CEBPB,USF1,NOTCH1
GO:0042127	Regulation of cell population proliferation	6	1669	0.85	0.0081	9606.ENSP00000249396,9606.ENSP00000305422,9606.ENSP00000340874,9606.ENSP00000368880,9606.ENSP00000379330,9606.ENSP00000498587	SIRT2,CEBPB,MEF2C,FOXO1,NFATC2,NOTCH1
GO:0048519	Negative regulation of biological process	9	5313	0.52	0.0081	9606.ENSP00000249396,9606.ENSP00000263253,9606.ENSP00000305422,9606.ENSP00000340874,9606.ENSP00000357000,9606.ENSP00000368880,9606.ENSP00000379330,9606.ENSP00000453095,9606.ENSP00000498587	SIRT2,EP300,CEBPB,MEF2C,USF1,FOXO1,NFATC2,MEF2A,NOTCH1
GO:0055001	Muscle cell development	3	160	1.57	0.0088	9606.ENSP00000379330,9606.ENSP00000453095,9606.ENSP00000498587	NFATC2,MEF2A,NOTCH1
GO:0048731	System development	8	3867	0.61	0.0091	9606.ENSP00000249396,9606.ENSP00000263253,9606.ENSP00000305422,9606.ENSP00000340874,9606.ENSP00000368880,9606.ENSP00000381382,9606.ENSP00000453095,9606.ENSP00000498587	SIRT2,EP300,CEBPB,MEF2C,FOXO1,TCF4,MEF2A,NOTCH1
GO:0060045	Positive regulation of cardiac muscle cell proliferation	2	23	2.23	0.0092	9606.ENSP00000340874,9606.ENSP00000498587	MEF2C,NOTCH1
GO:0097150	Neuronal stem cell population maintenance	2	23	2.23	0.0092	9606.ENSP00000368880,9606.ENSP00000498587	FOXO1,NOTCH1
GO:1901522	Positive regulation of transcription from RNA polymerase II promoter involved in cellular response to chemical stimulus	2	23	2.23	0.0092	9606.ENSP00000263253,9606.ENSP00000498587	EP300,NOTCH1
GO:0032870	Cellular response to hormone stimulus	4	489	1.21	0.0093	9606.ENSP00000340874,9606.ENSP00000357000,9606.ENSP00000368880,9606.ENSP00000498587	MEF2C,USF1,FOXO1,NOTCH1
GO:0050673	Epithelial cell proliferation	3	170	1.54	0.0097	9606.ENSP00000305422,9606.ENSP00000340874,9606.ENSP00000498587	CEBPB,MEF2C,NOTCH1
GO:0036003	Positive regulation of transcription from RNA polymerase II promoter in response to stress	2	25	2.2	0.0102	9606.ENSP00000305422,9606.ENSP00000498587	CEBPB,NOTCH1
GO:0043065	Positive regulation of apoptotic process	4	507	1.19	0.0104	9606.ENSP00000249396,9606.ENSP00000340874,9606.ENSP00000368880,9606.ENSP00000498587	SIRT2,MEF2C,FOXO1,NOTCH1
GO:0051239	Regulation of multicellular organismal process	7	2749	0.7	0.0105	9606.ENSP00000249396,9606.ENSP00000305422,9606.ENSP00000340874,9606.ENSP00000357000,9606.ENSP00000368880,9606.ENSP00000453095,9606.ENSP00000498587	SIRT2,CEBPB,MEF2C,USF1,FOXO1,MEF2A,NOTCH1
GO:0048738	Cardiac muscle tissue development	3	179	1.52	0.0109	9606.ENSP00000340874,9606.ENSP00000453095,9606.ENSP00000498587	MEF2C,MEF2A,NOTCH1
GO:1901701	Cellular response to oxygen-containing compound	5	1057	0.97	0.0111	9606.ENSP00000249396,9606.ENSP00000305422,9606.ENSP00000340874,9606.ENSP00000357000,9606.ENSP00000368880	SIRT2,CEBPB,MEF2C,USF1,FOXO1
GO:0010614	Negative regulation of cardiac muscle hypertrophy	2	29	2.13	0.0126	9606.ENSP00000368880,9606.ENSP00000498587	FOXO1,NOTCH1
GO:0007507	Heart development	4	548	1.16	0.0131	9606.ENSP00000263253,9606.ENSP00000340874,9606.ENSP00000453095,9606.ENSP00000498587	EP300,MEF2C,MEF2A,NOTCH1
GO:0045664	Regulation of neuron differentiation	3	194	1.48	0.0131	9606.ENSP00000340874,9606.ENSP00000381382,9606.ENSP00000498587	MEF2C,TCF4,NOTCH1
GO:0000904	Cell morphogenesis involved in differentiation	4	554	1.15	0.0133	9606.ENSP00000263253,9606.ENSP00000340874,9606.ENSP00000453095,9606.ENSP00000498587	EP300,MEF2C,MEF2A,NOTCH1
GO:0002429	Immune response-activating cell surface receptor signaling pathway	3	197	1.48	0.0133	9606.ENSP00000263253,9606.ENSP00000340874,9606.ENSP00000379330	EP300,MEF2C,NFATC2
GO:0051146	Striated muscle cell differentiation	3	204	1.46	0.0142	9606.ENSP00000340874,9606.ENSP00000379330,9606.ENSP00000453095	MEF2C,NFATC2,MEF2A
GO:0071219	Cellular response to molecule of bacterial origin	3	205	1.46	0.0142	9606.ENSP00000249396,9606.ENSP00000305422,9606.ENSP00000340874	SIRT2,CEBPB,MEF2C
GO:0043537	Negative regulation of blood vessel endothelial cell migration	2	35	2.05	0.0163	9606.ENSP00000340874,9606.ENSP00000498587	MEF2C,NOTCH1
GO:0035850	Epithelial cell differentiation involved in kidney development	2	36	2.04	0.0171	9606.ENSP00000340874,9606.ENSP00000498587	MEF2C,NOTCH1
GO:0051145	Smooth muscle cell differentiation	2	37	2.03	0.0179	9606.ENSP00000340874,9606.ENSP00000498587	MEF2C,NOTCH1
GO:0071241	Cellular response to inorganic substance	3	227	1.42	0.0185	9606.ENSP00000340874,9606.ENSP00000368880,9606.ENSP00000453095	MEF2C,FOXO1,MEF2A
GO:0007166	Cell surface receptor signaling pathway	6	2040	0.76	0.0186	9606.ENSP00000249396,9606.ENSP00000263253,9606.ENSP00000340874,9606.ENSP00000368880,9606.ENSP00000379330,9606.ENSP00000498587	SIRT2,EP300,MEF2C,FOXO1,NFATC2,NOTCH1
GO:0030279	Negative regulation of ossification	2	38	2.02	0.0186	9606.ENSP00000340874,9606.ENSP00000498587	MEF2C,NOTCH1
GO:0031347	Regulation of defense response	4	638	1.09	0.0201	9606.ENSP00000249396,9606.ENSP00000263253,9606.ENSP00000305422,9606.ENSP00000340874	SIRT2,EP300,CEBPB,MEF2C
GO:0014014	Negative regulation of gliogenesis	2	41	1.98	0.0207	9606.ENSP00000249396,9606.ENSP00000498587	SIRT2,NOTCH1
GO:0050670	Regulation of lymphocyte proliferation	3	242	1.39	0.0212	9606.ENSP00000305422,9606.ENSP00000340874,9606.ENSP00000379330	CEBPB,MEF2C,NFATC2
GO:0002376	Immune system process	6	2121	0.75	0.0221	9606.ENSP00000249396,9606.ENSP00000263253,9606.ENSP00000305422,9606.ENSP00000340874,9606.ENSP00000379330,9606.ENSP00000498587	SIRT2,EP300,CEBPB,MEF2C,NFATC2,NOTCH1
GO:0022008	Neurogenesis	5	1290	0.88	0.0223	9606.ENSP00000249396,9606.ENSP00000305422,9606.ENSP00000340874,9606.ENSP00000453095,9606.ENSP00000498587	SIRT2,CEBPB,MEF2C,MEF2A,NOTCH1
GO:0048584	Positive regulation of response to stimulus	6	2131	0.74	0.0223	9606.ENSP00000263253,9606.ENSP00000305422,9606.ENSP00000340874,9606.ENSP00000357000,9606.ENSP00000379330,9606.ENSP00000498587	EP300,CEBPB,MEF2C,USF1,NFATC2,NOTCH1
GO:0030890	Positive regulation of B cell proliferation	2	45	1.94	0.0235	9606.ENSP00000340874,9606.ENSP00000379330	MEF2C,NFATC2
GO:0045596	Negative regulation of cell differentiation	4	685	1.06	0.0248	9606.ENSP00000249396,9606.ENSP00000368880,9606.ENSP00000379330,9606.ENSP00000498587	SIRT2,FOXO1,NFATC2,NOTCH1
GO:0030099	Myeloid cell differentiation	3	263	1.35	0.0253	9606.ENSP00000263253,9606.ENSP00000305422,9606.ENSP00000340874	EP300,CEBPB,MEF2C
GO:0051716	Cellular response to stimulus	9	6357	0.45	0.0253	9606.ENSP00000249396,9606.ENSP00000263253,9606.ENSP00000305422,9606.ENSP00000340874,9606.ENSP00000357000,9606.ENSP00000368880,9606.ENSP00000379330,9606.ENSP00000453095,9606.ENSP00000498587	SIRT2,EP300,CEBPB,MEF2C,USF1,FOXO1,NFATC2,MEF2A,NOTCH1
GO:1901861	Regulation of muscle tissue development	2	47	1.92	0.0253	9606.ENSP00000249396,9606.ENSP00000340874	SIRT2,MEF2C
GO:0007165	Signal transduction	8	4714	0.52	0.0272	9606.ENSP00000249396,9606.ENSP00000263253,9606.ENSP00000305422,9606.ENSP00000340874,9606.ENSP00000368880,9606.ENSP00000379330,9606.ENSP00000453095,9606.ENSP00000498587	SIRT2,EP300,CEBPB,MEF2C,FOXO1,NFATC2,MEF2A,NOTCH1
GO:0007611	Learning or memory	3	271	1.34	0.0272	9606.ENSP00000263253,9606.ENSP00000305422,9606.ENSP00000340874	EP300,CEBPB,MEF2C
GO:0008285	Negative regulation of cell population proliferation	4	713	1.04	0.0272	9606.ENSP00000249396,9606.ENSP00000305422,9606.ENSP00000340874,9606.ENSP00000498587	SIRT2,CEBPB,MEF2C,NOTCH1
GO:0050853	B cell receptor signaling pathway	2	50	1.9	0.0272	9606.ENSP00000340874,9606.ENSP00000379330	MEF2C,NFATC2
GO:0006111	Regulation of gluconeogenesis	2	51	1.89	0.0275	9606.ENSP00000263253,9606.ENSP00000368880	EP300,FOXO1
GO:0009607	Response to biotic stimulus	5	1375	0.86	0.0275	9606.ENSP00000249396,9606.ENSP00000263253,9606.ENSP00000305422,9606.ENSP00000340874,9606.ENSP00000498587	SIRT2,EP300,CEBPB,MEF2C,NOTCH1
GO:0045599	Negative regulation of fat cell differentiation	2	52	1.88	0.0283	9606.ENSP00000249396,9606.ENSP00000368880	SIRT2,FOXO1
GO:0070169	Positive regulation of biomineral tissue development	2	54	1.86	0.03	9606.ENSP00000305422,9606.ENSP00000340874	CEBPB,MEF2C
GO:0003179	Heart valve morphogenesis	2	55	1.86	0.0309	9606.ENSP00000340874,9606.ENSP00000498587	MEF2C,NOTCH1
GO:0032835	Glomerulus development	2	56	1.85	0.0316	9606.ENSP00000340874,9606.ENSP00000498587	MEF2C,NOTCH1
GO:0031349	Positive regulation of defense response	3	296	1.3	0.0318	9606.ENSP00000263253,9606.ENSP00000305422,9606.ENSP00000340874	EP300,CEBPB,MEF2C
GO:0009605	Response to external stimulus	6	2355	0.7	0.0331	9606.ENSP00000249396,9606.ENSP00000305422,9606.ENSP00000340874,9606.ENSP00000357000,9606.ENSP00000368880,9606.ENSP00000498587	SIRT2,CEBPB,MEF2C,USF1,FOXO1,NOTCH1
GO:0043388	Positive regulation of DNA binding	2	58	1.83	0.0332	9606.ENSP00000249396,9606.ENSP00000263253	SIRT2,EP300
GO:0042981	Regulation of apoptotic process	5	1462	0.83	0.034	9606.ENSP00000249396,9606.ENSP00000305422,9606.ENSP00000340874,9606.ENSP00000368880,9606.ENSP00000498587	SIRT2,CEBPB,MEF2C,FOXO1,NOTCH1
GO:0051148	Negative regulation of muscle cell differentiation	2	60	1.82	0.035	9606.ENSP00000379330,9606.ENSP00000498587	NFATC2,NOTCH1
GO:0032496	Response to lipopolysaccharide	3	314	1.27	0.0364	9606.ENSP00000305422,9606.ENSP00000340874,9606.ENSP00000498587	CEBPB,MEF2C,NOTCH1
GO:0044419	Biological process involved in interspecies interaction between organisms	5	1490	0.82	0.0364	9606.ENSP00000249396,9606.ENSP00000263253,9606.ENSP00000305422,9606.ENSP00000340874,9606.ENSP00000498587	SIRT2,EP300,CEBPB,MEF2C,NOTCH1
GO:0001947	Heart looping	2	63	1.8	0.0372	9606.ENSP00000340874,9606.ENSP00000498587	MEF2C,NOTCH1
GO:0051240	Positive regulation of multicellular organismal process	5	1505	0.82	0.0372	9606.ENSP00000305422,9606.ENSP00000340874,9606.ENSP00000357000,9606.ENSP00000453095,9606.ENSP00000498587	CEBPB,MEF2C,USF1,MEF2A,NOTCH1
GO:0055006	Cardiac cell development	2	63	1.8	0.0372	9606.ENSP00000453095,9606.ENSP00000498587	MEF2A,NOTCH1
GO:0031100	Animal organ regeneration	2	67	1.77	0.0406	9606.ENSP00000305422,9606.ENSP00000498587	CEBPB,NOTCH1
GO:0033993	Response to lipid	4	827	0.98	0.0406	9606.ENSP00000305422,9606.ENSP00000340874,9606.ENSP00000368880,9606.ENSP00000498587	CEBPB,MEF2C,FOXO1,NOTCH1
GO:0045669	Positive regulation of osteoblast differentiation	2	68	1.76	0.041	9606.ENSP00000305422,9606.ENSP00000340874	CEBPB,MEF2C
GO:0003002	Regionalization	3	341	1.24	0.0423	9606.ENSP00000263253,9606.ENSP00000340874,9606.ENSP00000498587	EP300,MEF2C,NOTCH1
GO:0010506	Regulation of autophagy	3	346	1.23	0.0437	9606.ENSP00000249396,9606.ENSP00000263253,9606.ENSP00000368880	SIRT2,EP300,FOXO1
GO:0014070	Response to organic cyclic compound	4	861	0.96	0.0452	9606.ENSP00000249396,9606.ENSP00000305422,9606.ENSP00000340874,9606.ENSP00000498587	SIRT2,CEBPB,MEF2C,NOTCH1
GO:0003151	Outflow tract morphogenesis	2	74	1.73	0.0466	9606.ENSP00000340874,9606.ENSP00000498587	MEF2C,NOTCH1
GO:0061515	Myeloid cell development	2	74	1.73	0.0466	9606.ENSP00000263253,9606.ENSP00000305422	EP300,CEBPB
GO:0014902	Myotube differentiation	2	76	1.71	0.0486	9606.ENSP00000340874,9606.ENSP00000379330	MEF2C,NFATC2
GO:0045661	Regulation of myoblast differentiation	2	77	1.71	0.0496	9606.ENSP00000340874,9606.ENSP00000498587	MEF2C,NOTCH1
